# Supplementary material for: Remotely-sensed, nocturnal, dew point correlates with malaria transmission in Southern Province, Zambia: a time-series study
Source: PubMed Central journal article supplement (PMC4078093; doi:10.1186/1475-2875-13-231), 2014-06-13
Supplement: 1475-2875-13-231-S1.pdf [file 1475-2875-13-231-S1.pdf]

Remotely sensed nocturnal dew point correlates with malaria transmission in Southern Province, Zambia: a time-series study.  
David Nygren

```

-----
name: LOGfile of High Zone - model creation.
log: C:\Users\David\Google Drive\Zambia - ISEX T10\Data Monze + Choma\FINAL MODELS -
GRAPHS AND DOFILES\Log-file - exemplifying the process using High Zone.smcl
log type: smcl
opened on: 27 Dec 2013, 12:38:45

. * Importing casedata and climate variables for the High Zone

.
. import excel "C:\Users\David\Google Drive\Zambia - ISEX T10\Data Monze +
Choma\GISexcel\INCwVariables.xlsx", sheet("HI") firstrow

.
. * Creating a time-series data-set.

.
. gen wtime1=substr(TIME, 1, 122)

.
. gen wtime=weekly(wtime1, "yw")

.
. format wtime %tw

.
. tsset wtime
time variable: wtime, 2011w19 to 2013w43
delta: 1 week

.
. * log-transforming incidence data for normalization

.
. gen lnHi= ln(Hi)
(7 missing values generated)

.
. hist lnHi
(bin=11, start=1.7295599, width=.32318029)

.
.
. * Evaluating need of further differentiating making data stationary, a requirement for ARIMA-
modeling

.
. dfuller lnHi

Dickey-Fuller test for unit root                               Number of obs   =       121

               Test               ----- Interpolated Dickey-Fuller -----
               Statistic           1% Critical   5% Critical   10% Critical
               Value               Value         Value         Value
-----
Z(t)           -2.193              -3.503        -2.889        -2.579
-----
MacKinnon approximate p-value for Z(t) = 0.2087

.
.
. * Here we see that there is still a unit root, i.e a stochastic trend and we need to
differentiate the incidence for it to be stationary.

```

```

.
.
.
. * Next step is to look at the univariate correlations between incidence and environmental
variables as well as which lag times that hold significant patterns.

.
. * We use var to analyze this and create lagged variables when associations less than or
similar to p=0.1 are seen. We look at lags 1-11 weeks prior to incidence

.
. * but only use those with a biologically plausible coefficient and lag time.

.
.
.
. var lnHi DWP if tin(2012w19, 2013w36), lags(1/11)

```

Vector autoregression

```

Sample: 2012w19 - 2013w36          No. of obs   =          70
Log likelihood = -145.0064         AIC         = 5.457326
FPE           = .8455142          HQIC        = 6.04424
Det(Sigma_ml) = .2159488         SBIC        = 6.934908

```

| Equation | Parms | RMSE    | R-sq   | chi2     | P>chi2 |
|----------|-------|---------|--------|----------|--------|
| lnHi     | 23    | .30326  | 0.9069 | 681.7289 | 0.0000 |
| DWP      | 23    | 2.30242 | 0.8791 | 508.9686 | 0.0000 |

|       | Coef.     | Std. Err. | z     | P> z  | [95% Conf. Interval] |           |
|-------|-----------|-----------|-------|-------|----------------------|-----------|
| ----- |           |           |       |       |                      |           |
| lnHi  |           |           |       |       |                      |           |
| lnHi  |           |           |       |       |                      |           |
| L1.   | .4478496  | .1150198  | 3.89  | 0.000 | .222415              | .6732842  |
| L2.   | .3354528  | .1251641  | 2.68  | 0.007 | .0901357             | .58077    |
| L3.   | -.0091347 | .1285797  | -0.07 | 0.943 | -.2611464            | .242877   |
| L4.   | -.1428361 | .1300393  | -1.10 | 0.272 | -.3977084            | .1120362  |
| L5.   | -.1707216 | .1274569  | -1.34 | 0.180 | -.4205326            | .0790893  |
| L6.   | -.0594373 | .1280258  | -0.46 | 0.642 | -.3103632            | .1914886  |
| L7.   | .1769897  | .127949   | 1.38  | 0.167 | -.0737858            | .4277652  |
| L8.   | -.0265747 | .1312195  | -0.20 | 0.840 | -.2837602            | .2306109  |
| L9.   | -.1629274 | .1299029  | -1.25 | 0.210 | -.4175323            | .0916775  |
| L10.  | -.1048561 | .1305525  | -0.80 | 0.422 | -.3607342            | .1510221  |
| L11.  | .1898408  | .1102198  | 1.72  | 0.085 | -.026186             | .4058677  |
| DWP   |           |           |       |       |                      |           |
| L1.   | -.0066701 | .0163248  | -0.41 | 0.683 | -.0386662            | .025326   |
| L2.   | .0021479  | .018726   | 0.11  | 0.909 | -.0345544            | .0388503  |
| L3.   | .0101005  | .0186378  | 0.54  | 0.588 | -.0264289            | .0466298  |
| L4.   | -.0131142 | .0170476  | -0.77 | 0.442 | -.0465268            | .0202985  |
| L5.   | .009305   | .0171747  | 0.54  | 0.588 | -.0243568            | .0429669  |
| L6.   | .0350728  | .0174658  | 2.01  | 0.045 | .0008405             | .0693052  |
| L7.   | .0273658  | .0175494  | 1.56  | 0.119 | -.0070303            | .061762   |
| L8.   | -.0172147 | .0176606  | -0.97 | 0.330 | -.0518288            | .0173993  |
| L9.   | -.0025995 | .0180603  | -0.14 | 0.886 | -.0379971            | .0327981  |
| L10.  | .0061923  | .0192034  | 0.32  | 0.747 | -.0314456            | .0438303  |
| L11.  | .0224036  | .0168475  | 1.33  | 0.184 | -.0106168            | .0554241  |
| _cons | 1.497839  | .4300111  | 3.48  | 0.000 | .6550326             | 2.340645  |
| ----- |           |           |       |       |                      |           |
| DWP   |           |           |       |       |                      |           |
| lnHi  |           |           |       |       |                      |           |
| L1.   | .1306424  | .8732582  | 0.15  | 0.881 | -1.580912            | 1.842197  |
| L2.   | .3712285  | .9502765  | 0.39  | 0.696 | -1.491279            | 2.233736  |
| L3.   | -2.136934 | .9762089  | -2.19 | 0.029 | -4.050268            | -.2235997 |
| L4.   | 1.519299  | .98729    | 1.54  | 0.124 | -.4157539            | 3.454352  |
| L5.   | -.699657  | .9676839  | -0.72 | 0.470 | -2.596283            | 1.196969  |

|       |  |           |          |       |       |           |           |
|-------|--|-----------|----------|-------|-------|-----------|-----------|
| L6.   |  | -.6808712 | .9720029 | -0.70 | 0.484 | -2.585962 | 1.22422   |
| L7.   |  | .5663852  | .9714204 | 0.58  | 0.560 | -1.337564 | 2.470334  |
| L8.   |  | .1146423  | .9962507 | 0.12  | 0.908 | -1.837973 | 2.067258  |
| L9.   |  | -.5955843 | .9862542 | -0.60 | 0.546 | -2.528607 | 1.337438  |
| L10.  |  | -1.401578 | .9911865 | -1.41 | 0.157 | -3.344268 | .5411119  |
| L11.  |  | .6365379  | .8368158 | 0.76  | 0.447 | -1.003591 | 2.276667  |
|       |  |           |          |       |       |           |           |
| DWP   |  |           |          |       |       |           |           |
| L1.   |  | .6057632  | .1239421 | 4.89  | 0.000 | .362841   | .8486853  |
| L2.   |  | .1949611  | .1421726 | 1.37  | 0.170 | -.0836921 | .4736144  |
| L3.   |  | -.1178905 | .1415024 | -0.83 | 0.405 | -.3952301 | .1594491  |
| L4.   |  | .0708605  | .1294294 | 0.55  | 0.584 | -.1828164 | .3245374  |
| L5.   |  | .1749345  | .1303949 | 1.34  | 0.180 | -.0806347 | .4305038  |
| L6.   |  | -.061729  | .1326048 | -0.47 | 0.642 | -.3216295 | .1981715  |
| L7.   |  | -.0328258 | .1332392 | -0.25 | 0.805 | -.2939697 | .2283182  |
| L8.   |  | .2647082  | .1340833 | 1.97  | 0.048 | .0019098  | .5275065  |
| L9.   |  | -.4156697 | .1371185 | -3.03 | 0.002 | -.684417  | -.1469225 |
| L10.  |  | .3383101  | .1457967 | 2.32  | 0.020 | .0525539  | .6240663  |
| L11.  |  | -.0165741 | .12791   | -0.13 | 0.897 | -.2672731 | .234125   |
|       |  |           |          |       |       |           |           |
| _cons |  | 7.745701  | 3.264749 | 2.37  | 0.018 | 1.34691   | 14.14449  |

```

.
. gen L6DWP=L6.DWP
(6 missing values generated)

.
. gen L7DWP=L7.DWP
(7 missing values generated)

.
.
. var lnHi EVI if tin(2012w19, 2013w36), lags(1/11)

```

Vector autoregression

Sample: 2012w19 - 2013w35  
Log likelihood = 174.8125  
FPE = .0000864  
Det(Sigma\_ml) = .0000216

No. of obs = 69  
AIC = -3.733695  
HQIC = -3.142799  
SBIC = -2.244291

| Equation | Parms | RMSE    | R-sq   | chi2     | P>chi2 |
|----------|-------|---------|--------|----------|--------|
| lnHi     | 23    | .326867 | 0.8891 | 553.4116 | 0.0000 |
| EVI      | 23    | .022266 | 0.9670 | 2023.436 | 0.0000 |

|       | Coef.     | Std. Err. | z     | P> z  | [95% Conf. Interval] |
|-------|-----------|-----------|-------|-------|----------------------|
| ----- |           |           |       |       |                      |
| lnHi  |           |           |       |       |                      |
| lnHi  |           |           |       |       |                      |
| L1.   | .7282734  | .1234437  | 5.90  | 0.000 | .4863283 .9702186    |
| L2.   | .2244119  | .1467237  | 1.53  | 0.126 | -.0631613 .5119851   |
| L3.   | -.1092487 | .1379237  | -0.79 | 0.428 | -.3795742 .1610768   |
| L4.   | .017089   | .1394745  | 0.12  | 0.902 | -.256276 .290454     |
| L5.   | -.140225  | .1364614  | -1.03 | 0.304 | -.4076845 .1272345   |
| L6.   | .0605324  | .1387878  | 0.44  | 0.663 | -.2114867 .3325514   |
| L7.   | .2432314  | .1435545  | 1.69  | 0.090 | -.0381303 .5245931   |
| L8.   | -.2545845 | .1457994  | -1.75 | 0.081 | -.5403461 .0311771   |
| L9.   | -.0457895 | .1537057  | -0.30 | 0.766 | -.3470472 .2554681   |
| L10.  | .0050498  | .1397251  | 0.04  | 0.971 | -.2688065 .278906    |
| L11.  | .124205   | .1187349  | 1.05  | 0.296 | -.1085111 .3569211   |
|       |           |           |       |       |                      |
| EVI   |           |           |       |       |                      |
| L1.   | -2.100534 | 1.810096  | -1.16 | 0.246 | -5.648258 1.44719    |
| L2.   | 4.209475  | 2.139173  | 1.97  | 0.049 | .0167735 8.402176    |
| L3.   | -1.840505 | 2.148687  | -0.86 | 0.392 | -6.051854 2.370845   |
| L4.   | 1.760354  | 2.022775  | 0.87  | 0.384 | -2.204213 5.724921   |

|       |           |          |       |       |           |           |
|-------|-----------|----------|-------|-------|-----------|-----------|
| L5.   | 3.480571  | 2.382102 | 1.46  | 0.144 | -1.188262 | 8.149405  |
| L6.   | -5.343221 | 2.340576 | -2.28 | 0.022 | -9.930665 | -.7557772 |
| L7.   | 2.603986  | 2.380513 | 1.09  | 0.274 | -2.061733 | 7.269706  |
| L8.   | .9706414  | 1.942472 | 0.50  | 0.617 | -2.836533 | 4.777816  |
| L9.   | -6.309196 | 2.031447 | -3.11 | 0.002 | -10.29076 | -2.327633 |
| L10.  | 4.716474  | 2.184002 | 2.16  | 0.031 | .4359098  | 8.997039  |
| L11.  | -1.217352 | 1.840499 | -0.66 | 0.508 | -4.824665 | 2.38996   |
| _cons | .2183677  | .2428276 | 0.90  | 0.369 | -.2575656 | .694301   |
| ----- |           |          |       |       |           |           |
| EVI   |           |          |       |       |           |           |
| lnHi  |           |          |       |       |           |           |
| L1.   | .0108323  | .0084089 | 1.29  | 0.198 | -.0056488 | .0273134  |
| L2.   | -.0108705 | .0099947 | -1.09 | 0.277 | -.0304598 | .0087187  |
| L3.   | .0003939  | .0093953 | 0.04  | 0.967 | -.0180205 | .0188083  |
| L4.   | .0032353  | .0095009 | 0.34  | 0.733 | -.0153861 | .0218567  |
| L5.   | .0044601  | .0092956 | 0.48  | 0.631 | -.0137591 | .0226792  |
| L6.   | -.0029292 | .0094541 | -0.31 | 0.757 | -.021459  | .0156005  |
| L7.   | .0037072  | .0097788 | 0.38  | 0.705 | -.015459  | .0228733  |
| L8.   | -.0040519 | .0099317 | -0.41 | 0.683 | -.0235177 | .015414   |
| L9.   | -.000224  | .0104703 | -0.02 | 0.983 | -.0207454 | .0202974  |
| L10.  | .0125508  | .009518  | 1.32  | 0.187 | -.0061041 | .0312057  |
| L11.  | -.0085834 | .0080881 | -1.06 | 0.289 | -.0244358 | .0072691  |
| EVI   |           |          |       |       |           |           |
| L1.   | .596644   | .1233023 | 4.84  | 0.000 | .3549758  | .8383121  |
| L2.   | .1977649  | .1457187 | 1.36  | 0.175 | -.0878386 | .4833684  |
| L3.   | .0999815  | .1463669 | 0.68  | 0.495 | -.1868923 | .3868553  |
| L4.   | .7328531  | .1377898 | 5.32  | 0.000 | .4627899  | 1.002916  |
| L5.   | -.2333653 | .1622669 | -1.44 | 0.150 | -.5514025 | .0846719  |
| L6.   | -.2627655 | .1594382 | -1.65 | 0.099 | -.5752585 | .0497276  |
| L7.   | -.1254759 | .1621587 | -0.77 | 0.439 | -.443301  | .1923492  |
| L8.   | -.329755  | .1323196 | -2.49 | 0.013 | -.5890967 | -.0704134 |
| L9.   | .059779   | .1383806 | 0.43  | 0.666 | -.2114419 | .3309999  |
| L10.  | .0990438  | .1487725 | 0.67  | 0.506 | -.1925448 | .3906325  |
| L11.  | .0192087  | .1253734 | 0.15  | 0.878 | -.2265186 | .2649359  |
| _cons | .0131866  | .0165412 | 0.80  | 0.425 | -.0192336 | .0456068  |
| ----- |           |          |       |       |           |           |

```

.
. gen L10EVI=L10.EVI
(10 missing values generated)
.
.
. var lnHi LST if tin(2012w19, 2013w36), lags(1/11)

```

Vector autoregression

```

Sample: 2012w19 - 2013w36          No. of obs   =      70
Log likelihood = -93.43695         AIC          =  3.983913
FPE           = .1937429          HQIC         =  4.570827
Det(Sigma_ml) = .049483          SBIC         =  5.461495

```

| Equation | Parms | RMSE    | R-sq   | chi2     | P>chi2 |
|----------|-------|---------|--------|----------|--------|
| lnHi     | 23    | .303745 | 0.9066 | 679.3304 | 0.0000 |
| LST      | 23    | 1.1214  | 0.9193 | 797.699  | 0.0000 |

|      | Coef.     | Std. Err. | z     | P> z  | [95% Conf. Interval] |
|------|-----------|-----------|-------|-------|----------------------|
| lnHi |           |           |       |       |                      |
| lnHi |           |           |       |       |                      |
| L1.  | .5954682  | .1159689  | 5.13  | 0.000 | .3681734 .822763     |
| L2.  | .4355438  | .1387415  | 3.14  | 0.002 | .1636155 .707472     |
| L3.  | -.0539089 | .1349101  | -0.40 | 0.689 | -.3183279 .2105101   |
| L4.  | -.1307362 | .1341624  | -0.97 | 0.330 | -.3936897 .1322173   |

|       |  |           |          |       |       |           |           |
|-------|--|-----------|----------|-------|-------|-----------|-----------|
| L5.   |  | -.0959831 | .1261795 | -0.76 | 0.447 | -.3432903 | .1513242  |
| L6.   |  | .0177119  | .1255749 | 0.14  | 0.888 | -.2284102 | .2638341  |
| L7.   |  | .1349108  | .1268597 | 1.06  | 0.288 | -.1137296 | .3835513  |
| L8.   |  | -.0562185 | .1340666 | -0.42 | 0.675 | -.3189842 | .2065471  |
| L9.   |  | -.2003127 | .1329589 | -1.51 | 0.132 | -.4609073 | .060282   |
| L10.  |  | .031677   | .1334977 | 0.24  | 0.812 | -.2299737 | .2933278  |
| L11.  |  | .209614   | .1183524 | 1.77  | 0.077 | -.0223525 | .4415805  |
|       |  |           |          |       |       |           |           |
| LST   |  |           |          |       |       |           |           |
| L1.   |  | .0401948  | .0320676 | 1.25  | 0.210 | -.0226565 | .1030462  |
| L2.   |  | -.0714051 | .0367968 | -1.94 | 0.052 | -.1435255 | .0007153  |
| L3.   |  | .0610564  | .0380978 | 1.60  | 0.109 | -.013614  | .1357268  |
| L4.   |  | -.0220908 | .0384823 | -0.57 | 0.566 | -.0975146 | .0533331  |
| L5.   |  | .0206853  | .03635   | 0.57  | 0.569 | -.0505593 | .09193    |
| L6.   |  | -.0035974 | .0377154 | -0.10 | 0.924 | -.0775183 | .0703234  |
| L7.   |  | .1039718  | .0385709 | 2.70  | 0.007 | .0283742  | .1795695  |
| L8.   |  | -.0182399 | .0407487 | -0.45 | 0.654 | -.098106  | .0616262  |
| L9.   |  | -.1044516 | .0413544 | -2.53 | 0.012 | -.1855047 | -.0233984 |
| L10.  |  | .0082784  | .0423192 | 0.20  | 0.845 | -.0746658 | .0912225  |
| L11.  |  | .0523438  | .0339324 | 1.54  | 0.123 | -.0141624 | .11885    |
|       |  |           |          |       |       |           |           |
| _cons |  | -.8539527 | .460909  | -1.85 | 0.064 | -1.757318 | .0494123  |
| ----- |  |           |          |       |       |           |           |
| LST   |  |           |          |       |       |           |           |
| lnHi  |  |           |          |       |       |           |           |
| L1.   |  | -.2465946 | .4281477 | -0.58 | 0.565 | -1.085749 | .5925593  |
| L2.   |  | .2460483  | .5122222 | 0.48  | 0.631 | -.7578887 | 1.249985  |
| L3.   |  | .1813626  | .4980773 | 0.36  | 0.716 | -.7948509 | 1.157576  |
| L4.   |  | -.2774781 | .4953167 | -0.56 | 0.575 | -1.248281 | .6933249  |
| L5.   |  | -.0956666 | .4658445 | -0.21 | 0.837 | -1.008705 | .8173718  |
| L6.   |  | .5219866  | .4636122 | 1.13  | 0.260 | -.3866765 | 1.43065   |
| L7.   |  | -1.03674  | .4683558 | -2.21 | 0.027 | -1.9547   | -.1187795 |
| L8.   |  | .5535659  | .4949629 | 1.12  | 0.263 | -.4165435 | 1.523675  |
| L9.   |  | .7364477  | .4908734 | 1.50  | 0.134 | -.2256465 | 1.698542  |
| L10.  |  | -.6686946 | .4928628 | -1.36 | 0.175 | -1.634688 | .2972988  |
| L11.  |  | -.7933353 | .4369476 | -1.82 | 0.069 | -1.649737 | .0630662  |
|       |  |           |          |       |       |           |           |
| LST   |  |           |          |       |       |           |           |
| L1.   |  | .6017886  | .118391  | 5.08  | 0.000 | .3697465  | .8338306  |
| L2.   |  | .2441571  | .1358508 | 1.80  | 0.072 | -.0221056 | .5104199  |
| L3.   |  | .0070809  | .1406541 | 0.05  | 0.960 | -.2685962 | .2827579  |
| L4.   |  | -.0809593 | .1420734 | -0.57 | 0.569 | -.359418  | .1974993  |
| L5.   |  | .0131396  | .1342012 | 0.10  | 0.922 | -.24989   | .2761692  |
| L6.   |  | -.001116  | .1392423 | -0.01 | 0.994 | -.274026  | .2717939  |
| L7.   |  | .1110869  | .1424008 | 0.78  | 0.435 | -.1680135 | .3901872  |
| L8.   |  | .0056032  | .1504411 | 0.04  | 0.970 | -.2892559 | .3004623  |
| L9.   |  | -.2095125 | .1526771 | -1.37 | 0.170 | -.5087542 | .0897291  |
| L10.  |  | -.0631968 | .1562391 | -0.40 | 0.686 | -.3694198 | .2430261  |
| L11.  |  | .1065035  | .1252755 | 0.85  | 0.395 | -.139032  | .352039   |
|       |  |           |          |       |       |           |           |
| _cons |  | 8.107776  | 1.701638 | 4.76  | 0.000 | 4.772626  | 11.44293  |
| ----- |  |           |          |       |       |           |           |

```

.
. gen L7LST=L7.LST
(7 missing values generated)
.
.
. var lnHi NDVI if tin(2012w19, 2013w36), lags(1/11)

```

Vector autoregression

|                |                   |            |   |           |
|----------------|-------------------|------------|---|-----------|
| Sample:        | 2012w19 - 2013w36 | No. of obs | = | 70        |
| Log likelihood | = 164.896         | AIC        | = | -3.397029 |
| FPE            | = .0001207        | HQIC       | = | -2.810115 |
| Det(Sigma_ml)  | = .0000308        | SBIC       | = | -1.919447 |

| Equation | Parms | RMSE | R-sq | chi2 | P>chi2 |
|----------|-------|------|------|------|--------|
| -----    |       |      |      |      |        |

|      |    |         |        |          |        |
|------|----|---------|--------|----------|--------|
| lnHi | 23 | .29801  | 0.9101 | 708.4448 | 0.0000 |
| NDVI | 23 | .028215 | 0.9642 | 1883.57  | 0.0000 |

|       | Coef.     | Std. Err. | z     | P> z  | [95% Conf. Interval] |
|-------|-----------|-----------|-------|-------|----------------------|
| lnHi  |           |           |       |       |                      |
| lnHi  |           |           |       |       |                      |
| L1.   | .6478695  | .1173855  | 5.52  | 0.000 | .417798 .8779409     |
| L2.   | .2670647  | .1352566  | 1.97  | 0.048 | .0019667 .5321627    |
| L3.   | -.0801773 | .1250103  | -0.64 | 0.521 | -.325193 .1648385    |
| L4.   | .032128   | .1238746  | 0.26  | 0.795 | -.2106618 .2749177   |
| L5.   | -.1499056 | .1216782  | -1.23 | 0.218 | -.3883905 .0885792   |
| L6.   | .0388958  | .1234998  | 0.31  | 0.753 | -.2031594 .280951    |
| L7.   | .2728254  | .1255873  | 2.17  | 0.030 | .0266789 .5189719    |
| L8.   | -.2182587 | .1333239  | -1.64 | 0.102 | -.4795688 .0430514   |
| L9.   | -.0844528 | .1339531  | -0.63 | 0.528 | -.3469962 .1780905   |
| L10.  | .0220908  | .1271504  | 0.17  | 0.862 | -.2271194 .2713009   |
| L11.  | .210367   | .1104641  | 1.90  | 0.057 | -.0061386 .4268726   |
| NDVI  |           |           |       |       |                      |
| L1.   | -2.055607 | 1.2305    | -1.67 | 0.095 | -4.467342 .3561281   |
| L2.   | 1.64827   | 1.446066  | 1.14  | 0.254 | -1.185967 4.482508   |
| L3.   | -1.271288 | 1.413702  | -0.90 | 0.369 | -4.042093 1.499517   |
| L4.   | 1.911812  | 1.382224  | 1.38  | 0.167 | -.7972977 4.620921   |
| L5.   | 3.800446  | 1.529686  | 2.48  | 0.013 | .8023167 6.798576    |
| L6.   | -2.352412 | 1.568563  | -1.50 | 0.134 | -5.42674 .7219156    |
| L7.   | 2.391342  | 1.583975  | 1.51  | 0.131 | -.7131909 5.495875   |
| L8.   | .7320028  | 1.38758   | 0.53  | 0.598 | -1.987605 3.451611   |
| L9.   | -6.259987 | 1.418803  | -4.41 | 0.000 | -9.040789 -3.479185  |
| L10.  | 2.472254  | 1.629339  | 1.52  | 0.129 | -.7211908 5.665699   |
| L11.  | -1.602208 | 1.384862  | -1.16 | 0.247 | -4.316487 1.112071   |
| _cons | .402037   | .2111031  | 1.90  | 0.057 | -.0117175 .8157915   |

|       |           |          |       |       |                    |
|-------|-----------|----------|-------|-------|--------------------|
| NDVI  |           |          |       |       |                    |
| lnHi  |           |          |       |       |                    |
| L1.   | .0109094  | .0111137 | 0.98  | 0.326 | -.010873 .0326918  |
| L2.   | -.0104558 | .0128057 | -0.82 | 0.414 | -.0355544 .0146429 |
| L3.   | .0027026  | .0118356 | 0.23  | 0.819 | -.0204947 .0258999 |
| L4.   | .0041993  | .0117281 | 0.36  | 0.720 | -.0187872 .0271859 |
| L5.   | .0082316  | .0115201 | 0.71  | 0.475 | -.0143474 .0308106 |
| L6.   | -.0074295 | .0116926 | -0.64 | 0.525 | -.0303466 .0154875 |
| L7.   | -.0005792 | .0118902 | -0.05 | 0.961 | -.0238836 .0227251 |
| L8.   | .0049267  | .0126227 | 0.39  | 0.696 | -.0198133 .0296667 |
| L9.   | -.0000739 | .0126823 | -0.01 | 0.995 | -.0249306 .0247829 |
| L10.  | .0136786  | .0120382 | 1.14  | 0.256 | -.0099159 .037273  |
| L11.  | -.0034295 | .0104584 | -0.33 | 0.743 | -.0239275 .0170686 |
| NDVI  |           |          |       |       |                    |
| L1.   | .5985058  | .1164998 | 5.14  | 0.000 | .3701704 .8268412  |
| L2.   | .1360931  | .1369089 | 0.99  | 0.320 | -.1322434 .4044297 |
| L3.   | .0463343  | .1338448 | 0.35  | 0.729 | -.2159967 .3086652 |
| L4.   | .5105407  | .1308646 | 3.90  | 0.000 | .2540509 .7670305  |
| L5.   | -.0702115 | .1448258 | -0.48 | 0.628 | -.3540649 .2136419 |
| L6.   | -.1388223 | .1485066 | -0.93 | 0.350 | -.4298898 .1522453 |
| L7.   | -.0512604 | .1499657 | -0.34 | 0.732 | -.3451877 .2426669 |
| L8.   | -.1965712 | .1313717 | -1.50 | 0.135 | -.454055 .0609126  |
| L9.   | .1306462  | .1343277 | 0.97  | 0.331 | -.1326313 .3939237 |
| L10.  | -.1127831 | .1542606 | -0.73 | 0.465 | -.4151282 .1895621 |
| L11.  | -.1088519 | .1311143 | -0.83 | 0.406 | -.3658312 .1481274 |
| _cons | .0424343  | .0199866 | 2.12  | 0.034 | .0032613 .0816072  |

. gen L5NDVI=L5.NDVI  
(5 missing values generated)

```

. gen L7NDVI=L7.NDVI
(7 missing values generated)

.
.
.
. var lnHi RAINFALL if tin(2012w19, 2013w36), lags(1/11)

```

Vector autoregression

```

Sample: 2012w19 - 2013w35          No. of obs   =          69
Log likelihood = -332.5476         AIC          =   10.97239
FPE           = 210.5241          HQIC        =   11.56329
Det(Sigma_ml) = 52.63102         SBIC        =   12.4618

```

| Equation | Parms | RMSE    | R-sq   | chi2     | P>chi2 |
|----------|-------|---------|--------|----------|--------|
| lnHi     | 23    | .33972  | 0.8803 | 507.2035 | 0.0000 |
| RAINFALL | 23    | 32.2359 | 0.8603 | 424.7591 | 0.0000 |

|          | Coef.     | Std. Err. | z     | P> z  | [95% Conf. Interval] |
|----------|-----------|-----------|-------|-------|----------------------|
| lnHi     |           |           |       |       |                      |
| lnHi     |           |           |       |       |                      |
| L1.      | .7666585  | .1203811  | 6.37  | 0.000 | .5307159 1.002601    |
| L2.      | .347196   | .1482184  | 2.34  | 0.019 | .0566933 .6376987    |
| L3.      | -.1072091 | .1433246  | -0.75 | 0.454 | -.3881202 .1737019   |
| L4.      | -.0537564 | .1437034  | -0.37 | 0.708 | -.3354098 .2278971   |
| L5.      | -.1139687 | .1432925  | -0.80 | 0.426 | -.3948169 .1668794   |
| L6.      | .1167411  | .1449544  | 0.81  | 0.421 | -.1673643 .4008466   |
| L7.      | .1667119  | .1489607  | 1.12  | 0.263 | -.1252457 .4586694   |
| L8.      | -.3121845 | .1491634  | -2.09 | 0.036 | -.6045394 -.0198295  |
| L9.      | -.0325593 | .1600052  | -0.20 | 0.839 | -.3461637 .2810451   |
| L10.     | .0459889  | .1482715  | 0.31  | 0.756 | -.2446179 .3365958   |
| L11.     | .0301317  | .1223463  | 0.25  | 0.805 | -.2096626 .2699259   |
| RAINFALL |           |           |       |       |                      |
| L1.      | -.0008884 | .0012091  | -0.73 | 0.463 | -.0032582 .0014815   |
| L2.      | .0003679  | .0015574  | 0.24  | 0.813 | -.0026846 .0034204   |
| L3.      | .0018237  | .0015504  | 1.18  | 0.239 | -.0012151 .0048625   |
| L4.      | -.0003084 | .0015416  | -0.20 | 0.841 | -.0033298 .002713    |
| L5.      | -.0005486 | .0015224  | -0.36 | 0.719 | -.0035325 .0024353   |
| L6.      | -.0002668 | .0015381  | -0.17 | 0.862 | -.0032813 .0027478   |
| L7.      | .0017351  | .0015345  | 1.13  | 0.258 | -.0012725 .0047427   |
| L8.      | .0015445  | .0015454  | 1.00  | 0.318 | -.0014845 .0045734   |
| L9.      | -.0054244 | .0015501  | -3.50 | 0.000 | -.0084625 -.0023862  |
| L10.     | .0027332  | .0016809  | 1.63  | 0.104 | -.0005613 .0060278   |
| L11.     | -.000067  | .0012595  | -0.05 | 0.958 | -.0025355 .0024015   |
| _cons    | .4656873  | .3299495  | 1.41  | 0.158 | -.1810018 1.112376   |
| RAINFALL |           |           |       |       |                      |
| lnHi     |           |           |       |       |                      |
| L1.      | 16.16858  | 11.42292  | 1.42  | 0.157 | -6.219933 38.5571    |
| L2.      | -9.373096 | 14.06439  | -0.67 | 0.505 | -36.93879 18.1926    |
| L3.      | 7.501239  | 13.60002  | 0.55  | 0.581 | -19.15431 34.15678   |
| L4.      | 16.7284   | 13.63596  | 1.23  | 0.220 | -9.997588 43.45439   |
| L5.      | -4.288894 | 13.59697  | -0.32 | 0.752 | -30.93847 22.36069   |
| L6.      | -1.730918 | 13.75467  | -0.13 | 0.900 | -28.68958 25.22774   |
| L7.      | -11.9689  | 14.13482  | -0.85 | 0.397 | -39.67264 15.73484   |
| L8.      | 18.89885  | 14.15406  | 1.34  | 0.182 | -8.842605 46.6403    |
| L9.      | -1.905748 | 15.18283  | -0.13 | 0.900 | -31.66355 27.85205   |
| L10.     | -8.187956 | 14.06943  | -0.58 | 0.561 | -35.76353 19.38762   |
| L11.     | 2.628069  | 11.60939  | 0.23  | 0.821 | -20.12592 25.38206   |
| RAINFALL |           |           |       |       |                      |
| L1.      | .806386   | .1147348  | 7.03  | 0.000 | .5815099 1.031262    |
| L2.      | -.0163885 | .1477828  | -0.11 | 0.912 | -.3060373 .2732604   |
| L3.      | -.0592322 | .1471198  | -0.40 | 0.687 | -.3475817 .2291174   |

|       |  |           |          |       |       |           |           |
|-------|--|-----------|----------|-------|-------|-----------|-----------|
| L4.   |  | -.0808102 | .1462784 | -0.55 | 0.581 | -.3675106 | .2058901  |
| L5.   |  | .1531967  | .1444602 | 1.06  | 0.289 | -.1299401 | .4363335  |
| L6.   |  | -.0475661 | .1459462 | -0.33 | 0.744 | -.3336155 | .2384833  |
| L7.   |  | -.0480017 | .1456082 | -0.33 | 0.742 | -.3333885 | .2373852  |
| L8.   |  | .0755903  | .1466449 | 0.52  | 0.606 | -.2118284 | .3630091  |
| L9.   |  | -.2400493 | .1470882 | -1.63 | 0.103 | -.528337  | .0482384  |
| L10.  |  | .1853549  | .1595005 | 1.16  | 0.245 | -.1272603 | .4979701  |
| L11.  |  | -.1739681 | .1195095 | -1.46 | 0.145 | -.4082023 | .0602662  |
|       |  |           |          |       |       |           |           |
| _cons |  | -64.1134  | 31.30879 | -2.05 | 0.041 | -125.4775 | -2.749304 |

```

.
. gen L10RAINFALL=L10.RAINFALL
(10 missing values generated)

.
.
. *** These environmental variables are then tested in multivariate ARIMA-models -> ARIMAX.
These are

.
. * compared regarding to the Akaike's information criteria, with the lowest indicating the best
fit. The two best multivariate

.
. * models are chosen for further evaluation. Estimates stats show an overview. All use 1,1,1 as
arima-parameters now.

.
.
. ** Testing ARIMA-models with different nondifferentiated variables

.
.
. arima lnHi L6DWP L7DWP L10EVI L7LST L5NDVI L7NDVI if tin(2012w19, 2013w36), arima(1,1,1)

```

```

(setting optimization to BHHH)
Iteration 0: log likelihood = -9.3104415
Iteration 1: log likelihood = -8.4921827
Iteration 2: log likelihood = -7.6024975
Iteration 3: log likelihood = -7.2907722
Iteration 4: log likelihood = -7.2122104
(switching optimization to BFGS)
Iteration 5: log likelihood = -7.1883553
Iteration 6: log likelihood = -7.1710588
Iteration 7: log likelihood = -7.1696317
Iteration 8: log likelihood = -7.16855
Iteration 9: log likelihood = -7.168534
Iteration 10: log likelihood = -7.1685148
Iteration 11: log likelihood = -7.1685143

```

```

ARIMA regression
Sample: 2012w19 - 2013w36 Number of obs = 70
Wald chi2(8) = 43.02
Log likelihood = -7.168514 Prob > chi2 = 0.0000

```

|        |       | OPG      |           |      |       |                      |
|--------|-------|----------|-----------|------|-------|----------------------|
| D.lnHi |       | Coef.    | Std. Err. | z    | P> z  | [95% Conf. Interval] |
| lnHi   | L6DWP |          |           |      |       |                      |
|        | D1.   | .0137968 | .0183838  | 0.75 | 0.453 | -.0222349 .0498284   |
|        | L7DWP |          |           |      |       |                      |
|        | D1.   | .027144  | .0159155  | 1.71 | 0.088 | -.0040498 .0583378   |



|        |           |          |       |       |           |           |  |
|--------|-----------|----------|-------|-------|-----------|-----------|--|
| L10EVI |           |          |       |       |           |           |  |
| D1.    | -.769521  | 1.691665 | -0.45 | 0.649 | -4.085124 | 2.546082  |  |
| L7LST  |           |          |       |       |           |           |  |
| D1.    | .0820248  | .032653  | 2.51  | 0.012 | .0180261  | .1460235  |  |
| L5NDVI |           |          |       |       |           |           |  |
| D1.    | 1.25172   | 1.013452 | 1.24  | 0.217 | -.7346093 | 3.238049  |  |
| L7NDVI |           |          |       |       |           |           |  |
| D1.    | 2.373584  | 1.277386 | 1.86  | 0.063 | -.1300453 | 4.877214  |  |
| _cons  | -.0077443 | .0257445 | -0.30 | 0.764 | -.0582026 | .042714   |  |
| -----  |           |          |       |       |           |           |  |
| ARMA   |           |          |       |       |           |           |  |
| ar     |           |          |       |       |           |           |  |
| L1.    | -.5491054 | .2400446 | -2.29 | 0.022 | -1.019584 | -.0786268 |  |
| ma     |           |          |       |       |           |           |  |
| L1.    | .0880126  | .3363914 | 0.26  | 0.794 | -.5713024 | .7473275  |  |
| -----  |           |          |       |       |           |           |  |
| /sigma | .2675588  | .0289992 | 9.23  | 0.000 | .2107214  | .3243962  |  |

Note: The test of the variance against zero is one sided, and the two-sided confidence interval is truncated at zero.

.  
. estat ic

| Model | Obs | ll(null) | ll(model) | df | AIC      | BIC      |
|-------|-----|----------|-----------|----|----------|----------|
| .     | 70  | .        | -7.168514 | 10 | 34.33703 | 56.82198 |

Note: N=Obs used in calculating BIC; see [R] BIC note

. estimates store M1

.  
.  
.  
. arima lnHi L6DWP L7DWP L7LST L5NDVI L7NDVI if tin(2012w19, 2013w36), arima(1,1,1)

(setting optimization to BHHH)  
Iteration 0: log likelihood = -8.723498  
Iteration 1: log likelihood = -8.0209724  
Iteration 2: log likelihood = -7.7574323  
Iteration 3: log likelihood = -7.4103456  
Iteration 4: log likelihood = -7.3931155  
(switching optimization to BFGS)  
Iteration 5: log likelihood = -7.3730476  
Iteration 6: log likelihood = -7.3555546  
Iteration 7: log likelihood = -7.3553441  
Iteration 8: log likelihood = -7.3552553  
Iteration 9: log likelihood = -7.3552321  
Iteration 10: log likelihood = -7.3552286  
Iteration 11: log likelihood = -7.3552284

ARIMA regression

|                            |               |   |        |
|----------------------------|---------------|---|--------|
| Sample: 2012w19 - 2013w36  | Number of obs | = | 70     |
|                            | Wald chi2(7)  | = | 39.76  |
| Log likelihood = -7.355228 | Prob > chi2   | = | 0.0000 |

| D.lnHi | Coef. | OPG Std. Err. | z | P> z | [95% Conf. Interval] |
|--------|-------|---------------|---|------|----------------------|
| lnHi   |       |               |   |      |                      |

|        |  |           |          |       |       |           |          |
|--------|--|-----------|----------|-------|-------|-----------|----------|
| L6DWP  |  |           |          |       |       |           |          |
| D1.    |  | .0124134  | .0183189 | 0.68  | 0.498 | -.0234909 | .0483178 |
| L7DWP  |  |           |          |       |       |           |          |
| D1.    |  | .0259898  | .0159425 | 1.63  | 0.103 | -.0052569 | .0572366 |
| L7LST  |  |           |          |       |       |           |          |
| D1.    |  | .0845866  | .0324404 | 2.61  | 0.009 | .0210046  | .1481687 |
| L5NDVI |  |           |          |       |       |           |          |
| D1.    |  | .9839166  | .9487261 | 1.04  | 0.300 | -.8755524 | 2.843386 |
| L7NDVI |  |           |          |       |       |           |          |
| D1.    |  | 2.192994  | 1.329916 | 1.65  | 0.099 | -.4135928 | 4.79958  |
| _cons  |  | -.0076684 | .0264469 | -0.29 | 0.772 | -.0595034 | .0441666 |
| -----  |  |           |          |       |       |           |          |
| ARMA   |  |           |          |       |       |           |          |
| ar     |  |           |          |       |       |           |          |
| L1.    |  | -.5214658 | .262344  | -1.99 | 0.047 | -1.035651 | -.007281 |
| ma     |  |           |          |       |       |           |          |
| L1.    |  | .0860998  | .3497618 | 0.25  | 0.806 | -.5994208 | .7716203 |
| -----  |  |           |          |       |       |           |          |
| /sigma |  | .2683345  | .0289748 | 9.26  | 0.000 | .211545   | .3251239 |
| -----  |  |           |          |       |       |           |          |

Note: The test of the variance against zero is one sided, and the two-sided confidence interval is truncated at zero.

. estat ic

| Model | Obs | ll(null) | ll(model) | df | AIC      | BIC      |
|-------|-----|----------|-----------|----|----------|----------|
| .     | 70  | .        | -7.355228 | 9  | 32.71046 | 52.94691 |

Note: N=Obs used in calculating BIC; see [R] BIC note

. estimates store M2

. arima lnHi L7DWP L7LST L5NDVI L7NDVI if tin(2012w19, 2013w36), arima(1,1,1)

(setting optimization to BHHH)  
Iteration 0: log likelihood = -9.1384455  
Iteration 1: log likelihood = -8.0710161  
Iteration 2: log likelihood = -7.763473  
Iteration 3: log likelihood = -7.7360739  
Iteration 4: log likelihood = -7.728834  
(switching optimization to BFGS)  
Iteration 5: log likelihood = -7.722913  
Iteration 6: log likelihood = -7.7170635  
Iteration 7: log likelihood = -7.7169507  
Iteration 8: log likelihood = -7.7169214  
Iteration 9: log likelihood = -7.7169148  
Iteration 10: log likelihood = -7.7169145

ARIMA regression

|                  |                   |               |   |        |
|------------------|-------------------|---------------|---|--------|
| Sample:          | 2012w19 - 2013w36 | Number of obs | = | 70     |
| Log likelihood = | -7.716914         | Wald chi2(6)  | = | 39.04  |
|                  |                   | Prob > chi2   | = | 0.0000 |

| D.lnHi | Coef. | Std. Err. | z | P> z | [95% Conf. Interval] |
|--------|-------|-----------|---|------|----------------------|
|        |       |           |   |      |                      |

| lnHi   |     |           |          |       |       |           |          |
|--------|-----|-----------|----------|-------|-------|-----------|----------|
| L7DWP  | D1. | .0270427  | .0167322 | 1.62  | 0.106 | -.0057517 | .0598371 |
| L7LST  | D1. | .0948768  | .0278555 | 3.41  | 0.001 | .0402811  | .1494725 |
| L5NDVI | D1. | 1.220218  | .8941401 | 1.36  | 0.172 | -.5322646 | 2.9727   |
| L7NDVI | D1. | 2.11968   | 1.307911 | 1.62  | 0.105 | -.4437791 | 4.683139 |
| _cons  |     | -.0084875 | .0261738 | -0.32 | 0.746 | -.0597873 | .0428123 |
| -----  |     |           |          |       |       |           |          |
| ARMA   |     |           |          |       |       |           |          |
| ar     | L1. | -.5004121 | .2638259 | -1.90 | 0.058 | -1.017501 | .0166772 |
| ma     | L1. | .0616274  | .3473492 | 0.18  | 0.859 | -.6191646 | .7424194 |
| /sigma |     | .2697287  | .0279892 | 9.64  | 0.000 | .214871   | .3245864 |

Note: The test of the variance against zero is one sided, and the two-sided confidence interval is truncated at zero.

.  
. estat ic

| Model | Obs | ll(null) | ll(model) | df | AIC      | BIC      |
|-------|-----|----------|-----------|----|----------|----------|
| .     | 70  | .        | -7.716914 | 8  | 31.43383 | 49.42179 |

Note: N=Obs used in calculating BIC; see [R] BIC note

. estimates store M3

.  
. arima lnHi L7DWP L7LST L7NDVI if tin(2012w19, 2013w36), arima(1,1,1)

(setting optimization to BHHH)  
Iteration 0: log likelihood = -9.7522477  
Iteration 1: log likelihood = -9.0313967  
Iteration 2: log likelihood = -8.7719251  
Iteration 3: log likelihood = -8.7102241  
Iteration 4: log likelihood = -8.7059065  
(switching optimization to BFGS)  
Iteration 5: log likelihood = -8.6825257  
Iteration 6: log likelihood = -8.6558003  
Iteration 7: log likelihood = -8.6556826  
Iteration 8: log likelihood = -8.6555932  
Iteration 9: log likelihood = -8.6555869  
Iteration 10: log likelihood = -8.6555858  
Iteration 11: log likelihood = -8.6555857

ARIMA regression

Sample: 2012w19 - 2013w36                      Number of obs        =        70  
                                                 Wald chi2(5)         =        41.82  
Log likelihood = -8.655586                      Prob > chi2         =        0.0000

| D.lnHi | OPG   |           | z | P> z | [95% Conf. Interval] |
|--------|-------|-----------|---|------|----------------------|
|        | Coef. | Std. Err. |   |      |                      |
| lnHi   |       |           |   |      |                      |

|        |  |           |          |       |       |           |          |
|--------|--|-----------|----------|-------|-------|-----------|----------|
| L7DWP  |  |           |          |       |       |           |          |
| D1.    |  | .0323079  | .01793   | 1.80  | 0.072 | -.0028342 | .06745   |
| L7LST  |  |           |          |       |       |           |          |
| D1.    |  | .0929454  | .0253781 | 3.66  | 0.000 | .0432053  | .1426855 |
| L7NDVI |  |           |          |       |       |           |          |
| D1.    |  | 1.960931  | 1.324157 | 1.48  | 0.139 | -.6343693 | 4.556231 |
| _cons  |  | -.0137697 | .0266529 | -0.52 | 0.605 | -.0660084 | .038469  |
| -----  |  |           |          |       |       |           |          |
| ARMA   |  |           |          |       |       |           |          |
| ar     |  |           |          |       |       |           |          |
| L1.    |  | -.4649715 | .2826193 | -1.65 | 0.100 | -1.018895 | .0889521 |
| ma     |  |           |          |       |       |           |          |
| L1.    |  | .0504677  | .361023  | 0.14  | 0.889 | -.6571243 | .7580597 |
| -----  |  |           |          |       |       |           |          |
| /sigma |  | .2734307  | .0260862 | 10.48 | 0.000 | .2223027  | .3245587 |
| -----  |  |           |          |       |       |           |          |

Note: The test of the variance against zero is one sided, and the two-sided confidence interval is truncated at zero.

.  
. estat ic

| Model | Obs | ll(null) | ll(model) | df | AIC      | BIC      |
|-------|-----|----------|-----------|----|----------|----------|
| .     | 70  | .        | -8.655586 | 7  | 31.31117 | 47.05064 |

Note: N=Obs used in calculating BIC; see [R] BIC note

. estimates store M4  
.  
.  
.  
. arima lnHi L7DWP L7LST if tin(2012w19, 2013w36), arima(1,1,1)

(setting optimization to BHHH)  
Iteration 0: log likelihood = -11.513957  
Iteration 1: log likelihood = -11.005714  
Iteration 2: log likelihood = -10.901356  
Iteration 3: log likelihood = -10.893997  
Iteration 4: log likelihood = -10.890163  
(switching optimization to BFGS)  
Iteration 5: log likelihood = -10.889136  
Iteration 6: log likelihood = -10.888497  
Iteration 7: log likelihood = -10.888494  
Iteration 8: log likelihood = -10.888494

ARIMA regression

Sample: 2012w19 - 2013w36                      Number of obs        =        70  
                                                 Wald chi2(4)         =        32.56  
Log likelihood = -10.88849                      Prob > chi2          =        0.0000

|        |       | OPG       |           |       |       |                      |
|--------|-------|-----------|-----------|-------|-------|----------------------|
| D.lnHi |       | Coef.     | Std. Err. | z     | P> z  | [95% Conf. Interval] |
| lnHi   | L7DWP |           |           |       |       |                      |
|        | D1.   | .0352464  | .0167862  | 2.10  | 0.036 | .002346 .0681468     |
|        | L7LST |           |           |       |       |                      |
|        | D1.   | .103655   | .0251477  | 4.12  | 0.000 | .0543665 .1529435    |
|        | _cons | -.0208092 | .0257976  | -0.81 | 0.420 | -.0713715 .0297531   |

```
-----
```

| ARMA   |    |           |          |       |       |                    |
|--------|----|-----------|----------|-------|-------|--------------------|
|        | ar |           |          |       |       |                    |
| L1.    |    | -.4149715 | .333382  | -1.24 | 0.213 | -1.068388 .2384452 |
|        | ma |           |          |       |       |                    |
| L1.    |    | .0601303  | .3979042 | 0.15  | 0.880 | -.7197476 .8400082 |
| /sigma |    | .2824101  | .0290265 | 9.73  | 0.000 | .2255192 .3393011  |

```
-----
```

Note: The test of the variance against zero is one sided, and the two-sided confidence interval is truncated at zero.

```
.
. estat ic
```

```
-----
```

| Model | Obs | ll(null) | ll(model) | df | AIC      | BIC      |
|-------|-----|----------|-----------|----|----------|----------|
| .     | 70  | .        | -10.88849 | 6  | 33.77699 | 47.26796 |

```
-----
```

Note: N=Obs used in calculating BIC; see [R] BIC note

```
.
. estimates store M5
.
.
.
. arima lnHi L7LST if tin(2012w19, 2013w36), arima(1,1,1)
```

```
(setting optimization to BHHH)
Iteration 0: log likelihood = -15.302867
Iteration 1: log likelihood = -14.664458
Iteration 2: log likelihood = -14.046832
Iteration 3: log likelihood = -14.018271
Iteration 4: log likelihood = -13.995699
(switching optimization to BFGS)
Iteration 5: log likelihood = -13.994925
Iteration 6: log likelihood = -13.994029
Iteration 7: log likelihood = -13.99401
Iteration 8: log likelihood = -13.99401
```

ARIMA regression

```
Sample: 2012w19 - 2013w36      Number of obs      =      70
                                Wald chi2(3)             =     33.39
Log likelihood = -13.99401     Prob > chi2        =     0.0000
```

```
-----
```

| D.lnHi |           |               |          |       |                      |                   |
|--------|-----------|---------------|----------|-------|----------------------|-------------------|
|        | Coef.     | OPG Std. Err. | z        | P> z  | [95% Conf. Interval] |                   |
| lnHi   |           |               |          |       |                      |                   |
| L7LST  |           |               |          |       |                      |                   |
| D1.    | .1235786  | .0249941      | 4.94     | 0.000 | .0745911             | .1725661          |
| _cons  |           |               |          |       |                      |                   |
|        | -.0260946 | .0278617      | -0.94    | 0.349 | -.0807026            | .0285133          |
| ARMA   |           |               |          |       |                      |                   |
|        | ar        |               |          |       |                      |                   |
| L1.    | -.4297409 | .3398264      | -1.26    | 0.206 | -1.095788            | .2363065          |
|        | ma        |               |          |       |                      |                   |
| L1.    | .1053449  | .3947713      | 0.27     | 0.790 | -.6683927            | .8790825          |
| /sigma |           | .2952518      | .0326295 | 9.05  | 0.000                | .2312992 .3592044 |

```
-----
```

Note: The test of the variance against zero is one sided, and the two-sided confidence interval is truncated at zero.

```
. estat ic
```

| Model | Obs | ll(null) | ll(model) | df | AIC      | BIC     |
|-------|-----|----------|-----------|----|----------|---------|
| .     | 70  | .        | -13.99401 | 5  | 37.98802 | 49.2305 |

Note: N=Obs used in calculating BIC; see [R] BIC note

```
. estimates store M6
```

```
.
.
.
. arima lnHi if tin(2012w19, 2013w36), arima(1,1,1)
```

```
(setting optimization to BHHH)
Iteration 0: log likelihood = -22.53879
Iteration 1: log likelihood = -21.170514
Iteration 2: log likelihood = -21.110811
Iteration 3: log likelihood = -21.107847
Iteration 4: log likelihood = -21.1073
(switching optimization to BFGS)
Iteration 5: log likelihood = -21.107196
Iteration 6: log likelihood = -21.107167
Iteration 7: log likelihood = -21.107166
```

ARIMA regression

```
Sample: 2012w19 - 2013w36      Number of obs   =      70
                               Wald chi2(2)        =      6.75
Log likelihood = -21.10717     Prob > chi2    =     0.0342
```

|      | D.lnHi | Coef.     | OPG<br>Std. Err. | z     | P> z  | [95% Conf. Interval] |
|------|--------|-----------|------------------|-------|-------|----------------------|
| lnHi |        |           |                  |       |       |                      |
|      | _cons  | -.033687  | .0345996         | -0.97 | 0.330 | -.101501 .034127     |
| ARMA |        |           |                  |       |       |                      |
|      | ar     |           |                  |       |       |                      |
|      | L1.    | -.4880343 | .4129426         | -1.18 | 0.237 | -1.297387 .3213185   |
|      | ma     |           |                  |       |       |                      |
|      | L1.    | .2669846  | .4758861         | 0.56  | 0.575 | -.665735 1.199704    |
|      | /sigma | .3269661  | .0317527         | 10.30 | 0.000 | .264732 .3892003     |

Note: The test of the variance against zero is one sided, and the two-sided confidence interval is truncated at zero.

```
. estat ic
```

| Model | Obs | ll(null) | ll(model) | df | AIC      | BIC      |
|-------|-----|----------|-----------|----|----------|----------|
| .     | 70  | .        | -21.10717 | 4  | 50.21433 | 59.20831 |

Note: N=Obs used in calculating BIC; see [R] BIC note

```
. estimates store M7
```

```
.
.
.
. arima lnHi L7DWP L7NDVI if tin(2012w19, 2013w36), arima(1,1,1)
```

```

(setting optimization to BHHH)
Iteration 0: log likelihood = -15.58843
Iteration 1: log likelihood = -13.845294
Iteration 2: log likelihood = -13.628197
Iteration 3: log likelihood = -13.627994
Iteration 4: log likelihood = -13.587902
(switching optimization to BFGS)
Iteration 5: log likelihood = -13.437526
Iteration 6: log likelihood = -13.423772
Iteration 7: log likelihood = -13.422658
Iteration 8: log likelihood = -13.422509
Iteration 9: log likelihood = -13.422478
Iteration 10: log likelihood = -13.422458
Iteration 11: log likelihood = -13.422458

```

ARIMA regression

```

Sample: 2012w19 - 2013w36           Number of obs   =       70
                                   Wald chi2(4)       =       27.07
Log likelihood = -13.42246          Prob > chi2     =       0.0000

```

|        |        | OPG       |           |       |       |                      |          |
|--------|--------|-----------|-----------|-------|-------|----------------------|----------|
| D.lnHi |        | Coef.     | Std. Err. | z     | P> z  | [95% Conf. Interval] |          |
| -----  |        |           |           |       |       |                      |          |
| lnHi   |        |           |           |       |       |                      |          |
|        | L7DWP  |           |           |       |       |                      |          |
|        | D1.    | .0439282  | .0181694  | 2.42  | 0.016 | .0083169             | .0795395 |
|        | L7NDVI |           |           |       |       |                      |          |
|        | D1.    | 2.41869   | 1.321015  | 1.83  | 0.067 | -.1704517            | 5.007831 |
|        | _cons  | -.0152533 | .0295543  | -0.52 | 0.606 | -.0731786            | .042672  |
| -----  |        |           |           |       |       |                      |          |
| ARMA   |        |           |           |       |       |                      |          |
|        | ar     |           |           |       |       |                      |          |
|        | L1.    | -.4179664 | .3009655  | -1.39 | 0.165 | -1.007848            | .171915  |
|        | ma     |           |           |       |       |                      |          |
|        | L1.    | .0186104  | .3658031  | 0.05  | 0.959 | -.6983506            | .7355714 |
| -----  |        |           |           |       |       |                      |          |
|        | /sigma | .2927459  | .0226054  | 12.95 | 0.000 | .2484402             | .3370517 |
| -----  |        |           |           |       |       |                      |          |

Note: The test of the variance against zero is one sided, and the two-sided confidence interval is truncated at zero.

```

.
. estat ic

```

| Model | Obs | ll(null) | ll(model) | df | AIC      | BIC      |
|-------|-----|----------|-----------|----|----------|----------|
| .     | 70  | .        | -13.42246 | 6  | 38.84492 | 52.33589 |

Note: N=Obs used in calculating BIC; see [R] BIC note

```

.
. estimates store M101
.
.
. arima lnHi L7DWP if tin(2012w19, 2013w36), arima(1,1,1)

```

```

(setting optimization to BHHH)
Iteration 0: log likelihood = -17.93083
Iteration 1: log likelihood = -16.578535
Iteration 2: log likelihood = -16.466147
Iteration 3: log likelihood = -16.454106
Iteration 4: log likelihood = -16.425622

```

```
(switching optimization to BFGS)
Iteration 5: log likelihood = -16.424587
Iteration 6: log likelihood = -16.42428
Iteration 7: log likelihood = -16.424235
Iteration 8: log likelihood = -16.424235
```

ARIMA regression

```
Sample: 2012w19 - 2013w36      Number of obs   =      70
                                Wald chi2(3)         =     14.18
Log likelihood = -16.42423     Prob > chi2      =     0.0027
```

```
-----+-----
```

|      | D.lnHi | Coef.     | OPG<br>Std. Err. | z     | P> z  | [95% Conf. Interval] |          |
|------|--------|-----------|------------------|-------|-------|----------------------|----------|
| lnHi |        |           |                  |       |       |                      |          |
|      | L7DWP  |           |                  |       |       |                      |          |
|      | D1.    | .048054   | .0183351         | 2.62  | 0.009 | .0121179             | .0839901 |
|      | _cons  | -.0247632 | .0286251         | -0.87 | 0.387 | -.0808674            | .031341  |
| ARMA |        |           |                  |       |       |                      |          |
|      | ar     |           |                  |       |       |                      |          |
|      | L1.    | -.3643952 | .3575193         | -1.02 | 0.308 | -1.06512             | .3363298 |
|      | ma     |           |                  |       |       |                      |          |
|      | L1.    | .0340069  | .4052951         | 0.08  | 0.933 | -.7603569            | .8283707 |
|      | /sigma | .3056916  | .0257309         | 11.88 | 0.000 | .2552599             | .3561233 |

```
-----+-----
```

Note: The test of the variance against zero is one sided, and the two-sided confidence interval is truncated at zero.

```
. estat ic
```

```
-----+-----
```

| Model | Obs | ll(null) | ll(model) | df | AIC      | BIC      |
|-------|-----|----------|-----------|----|----------|----------|
| .     | 70  | .        | -16.42423 | 5  | 42.84847 | 54.09095 |

```
-----+-----
```

Note: N=Obs used in calculating BIC; see [R] BIC note

```
. estimates store M102
```

```
. arima lnHi L7LST L7NDVI if tin(2012w19, 2013w36), arima(1,1,1)
```

```
(setting optimization to BHHH)
Iteration 0: log likelihood = -13.815654
Iteration 1: log likelihood = -12.731133
Iteration 2: log likelihood = -11.513754
Iteration 3: log likelihood = -11.490257
Iteration 4: log likelihood = -11.477087
(switching optimization to BFGS)
Iteration 5: log likelihood = -11.476879
Iteration 6: log likelihood = -11.476568
Iteration 7: log likelihood = -11.476554
Iteration 8: log likelihood = -11.476545
Iteration 9: log likelihood = -11.476545
```

ARIMA regression

```
Sample: 2012w19 - 2013w36      Number of obs   =      70
                                Wald chi2(4)         =     32.35
Log likelihood = -11.47655     Prob > chi2      =     0.0000
```



```
-----
```

|        |        | OPG       |           | z     | P> z  | [95% Conf. Interval] |          |
|--------|--------|-----------|-----------|-------|-------|----------------------|----------|
| D.lnHi |        | Coef.     | Std. Err. |       |       |                      |          |
| lnHi   | L7LST  |           |           |       |       |                      |          |
|        | D1.    | .1116425  | .024086   | 4.64  | 0.000 | .0644349             | .1588501 |
|        | L7NDVI |           |           |       |       |                      |          |
|        | D1.    | 2.187114  | 1.369869  | 1.60  | 0.110 | -.4977796            | 4.872007 |
|        | _cons  | -.0177045 | .0268065  | -0.66 | 0.509 | -.0702442            | .0348353 |
| -----  |        |           |           |       |       |                      |          |
| ARMA   | ar     |           |           |       |       |                      |          |
|        | L1.    | -.4805499 | .2554347  | -1.88 | 0.060 | -.9811928            | .0200929 |
|        | ma     |           |           |       |       |                      |          |
|        | L1.    | .0831911  | .3110307  | 0.27  | 0.789 | -.5264178            | .6928    |
| -----  |        |           |           |       |       |                      |          |
|        | /sigma | .2846963  | .0287175  | 9.91  | 0.000 | .228411              | .3409816 |

Note: The test of the variance against zero is one sided, and the two-sided confidence interval is truncated at zero.

```
.
. estat ic
```

```
-----
```

| Model | Obs | ll(null) | ll(model) | df | AIC      | BIC      |
|-------|-----|----------|-----------|----|----------|----------|
| .     | 70  | .        | -11.47655 | 6  | 34.95309 | 48.44406 |

```
-----
```

Note: N=Obs used in calculating BIC; see [R] BIC note

```
.
. estimates store M103
.
.
.
.
.
.
.
. estimates stats M1 M2 M3 M4 M5 M6 M7 M101 M102 M103
```

```
-----
```

| Model | Obs | ll(null) | ll(model) | df | AIC      | BIC      |
|-------|-----|----------|-----------|----|----------|----------|
| M1    | 70  | .        | -7.168514 | 10 | 34.33703 | 56.82198 |
| M2    | 70  | .        | -7.355228 | 9  | 32.71046 | 52.94691 |
| M3    | 70  | .        | -7.716914 | 8  | 31.43383 | 49.42179 |
| M4    | 70  | .        | -8.655586 | 7  | 31.31117 | 47.05064 |
| M5    | 70  | .        | -10.88849 | 6  | 33.77699 | 47.26796 |
| M6    | 70  | .        | -13.99401 | 5  | 37.98802 | 49.2305  |
| M7    | 70  | .        | -21.10717 | 4  | 50.21433 | 59.20831 |
| M101  | 70  | .        | -13.42246 | 6  | 38.84492 | 52.33589 |
| M102  | 70  | .        | -16.42423 | 5  | 42.84847 | 54.09095 |
| M103  | 70  | .        | -11.47655 | 6  | 34.95309 | 48.44406 |

```
-----
```

Note: N=Obs used in calculating BIC; see [R] BIC note

```
.
.
.
. * the next step is to further evaluate M3 and M4, due to them having the lowest AIC-values.
.
. * Here we perform modeling of these with different ARIMA-parameters, thereafter again looking
```

. \* at an overview and choosing the best model.

. arima lnHi L7DWP L7LST L7NDVI if tin(2012w19, 2013w36), arima(1,1,1)

(setting optimization to BHHH)  
 Iteration 0: log likelihood = -9.7522477  
 Iteration 1: log likelihood = -9.0313967  
 Iteration 2: log likelihood = -8.7719251  
 Iteration 3: log likelihood = -8.7102241  
 Iteration 4: log likelihood = -8.7059065  
 (switching optimization to BFGS)  
 Iteration 5: log likelihood = -8.6825257  
 Iteration 6: log likelihood = -8.6558003  
 Iteration 7: log likelihood = -8.6556826  
 Iteration 8: log likelihood = -8.6555932  
 Iteration 9: log likelihood = -8.6555869  
 Iteration 10: log likelihood = -8.6555858  
 Iteration 11: log likelihood = -8.6555857

ARIMA regression

Sample: 2012w19 - 2013w36                      Number of obs        =        70  
                                                  Wald chi2(5)        =        41.82  
 Log likelihood = -8.655586                      Prob > chi2         =        0.0000

|       |        | Coef.     | OPG<br>Std. Err. | z     | P> z  | [95% Conf. Interval] |          |
|-------|--------|-----------|------------------|-------|-------|----------------------|----------|
| ----- |        |           |                  |       |       |                      |          |
| lnHi  |        |           |                  |       |       |                      |          |
|       | L7DWP  |           |                  |       |       |                      |          |
|       | D1.    | .0323079  | .01793           | 1.80  | 0.072 | -.0028342            | .06745   |
|       | L7LST  |           |                  |       |       |                      |          |
|       | D1.    | .0929454  | .0253781         | 3.66  | 0.000 | .0432053             | .1426855 |
|       | L7NDVI |           |                  |       |       |                      |          |
|       | D1.    | 1.960931  | 1.324157         | 1.48  | 0.139 | -.6343693            | 4.556231 |
|       | _cons  | -.0137697 | .0266529         | -0.52 | 0.605 | -.0660084            | .038469  |
| ----- |        |           |                  |       |       |                      |          |
| ARMA  |        |           |                  |       |       |                      |          |
|       | ar     |           |                  |       |       |                      |          |
|       | L1.    | -.4649715 | .2826193         | -1.65 | 0.100 | -1.018895            | .0889521 |
|       | ma     |           |                  |       |       |                      |          |
|       | L1.    | .0504677  | .361023          | 0.14  | 0.889 | -.6571243            | .7580597 |
| ----- |        |           |                  |       |       |                      |          |
|       | /sigma | .2734307  | .0260862         | 10.48 | 0.000 | .2223027             | .3245587 |
| ----- |        |           |                  |       |       |                      |          |

Note: The test of the variance against zero is one sided, and the two-sided confidence interval is truncated at zero.

. estat ic

| Model | Obs | ll(null) | ll(model) | df | AIC      | BIC      |
|-------|-----|----------|-----------|----|----------|----------|
| .     | 70  | .        | -8.655586 | 7  | 31.31117 | 47.05064 |

Note: N=Obs used in calculating BIC; see [R] BIC note

. estimates store M8

.  
 .  
 .

. arima lnHi L7DWP L7LST L7NDVI if tin(2012w19, 2013w36), arima(2,1,1)

```
(setting optimization to BHHH)
Iteration 0: log likelihood = -10.3389
Iteration 1: log likelihood = -9.3532444
Iteration 2: log likelihood = -8.8555994
Iteration 3: log likelihood = -8.5710963
Iteration 4: log likelihood = -8.3680095
(switching optimization to BFGS)
Iteration 5: log likelihood = -8.3051507
Iteration 6: log likelihood = -8.0178239
Iteration 7: log likelihood = -7.9551909
Iteration 8: log likelihood = -7.9491677
Iteration 9: log likelihood = -7.9485272
Iteration 10: log likelihood = -7.9480986
Iteration 11: log likelihood = -7.9480278
Iteration 12: log likelihood = -7.9479546
Iteration 13: log likelihood = -7.9479522
Iteration 14: log likelihood = -7.9479505
(switching optimization to BHHH)
Iteration 15: log likelihood = -7.9479504
Iteration 16: log likelihood = -7.9479504 (backed up)
Iteration 17: log likelihood = -7.9479504 (not concave)
Iteration 18: log likelihood = -7.9479504
Iteration 19: log likelihood = -7.9479504 (backed up)
(switching optimization to BFGS)
Iteration 20: log likelihood = -7.9479504
```

ARIMA regression

```
Sample: 2012w19 - 2013w36      Number of obs   =      70
                                Wald chi2(6)        =     573.60
Log likelihood = -7.94795      Prob > chi2     =     0.0000
```

| D.lnHi |        | Coef.     | OPG<br>Std. Err. | z      | P> z  | [95% Conf. Interval] |           |
|--------|--------|-----------|------------------|--------|-------|----------------------|-----------|
| -----  |        |           |                  |        |       |                      |           |
| lnHi   |        |           |                  |        |       |                      |           |
|        | L7DWP  |           |                  |        |       |                      |           |
|        | D1.    | .0288628  | .0159798         | 1.81   | 0.071 | -.0024571            | .0601827  |
|        | L7LST  |           |                  |        |       |                      |           |
|        | D1.    | .0983511  | .0256379         | 3.84   | 0.000 | .0481017             | .1486005  |
|        | L7NDVI |           |                  |        |       |                      |           |
|        | D1.    | 1.814922  | 1.331916         | 1.36   | 0.173 | -.7955845            | 4.425429  |
|        | _cons  | -.0146129 | .0268041         | -0.55  | 0.586 | -.067148             | .0379222  |
| -----  |        |           |                  |        |       |                      |           |
| ARMA   |        |           |                  |        |       |                      |           |
|        | ar     |           |                  |        |       |                      |           |
|        | L1.    | -1.395268 | .1244441         | -11.21 | 0.000 | -1.639174            | -1.151362 |
|        | L2.    | -.4495805 | .1279622         | -3.51  | 0.000 | -.7003819            | -.1987791 |
|        | ma     |           |                  |        |       |                      |           |
|        | L1.    | .9999995  | 3869.844         | 0.00   | 1.000 | -7583.754            | 7585.754  |
| -----  |        |           |                  |        |       |                      |           |
|        | /sigma | .2677417  | 518.0446         | 0.00   | 0.500 | 0                    | 1015.617  |
| -----  |        |           |                  |        |       |                      |           |

Note: The test of the variance against zero is one sided, and the two-sided confidence interval is truncated at zero.

. estat ic

| Model | Obs | ll (null) | ll (model) | df | AIC     | BIC      |
|-------|-----|-----------|------------|----|---------|----------|
| .     | 70  | .         | -7.94795   | 8  | 31.8959 | 49.88386 |

Note: N=Obs used in calculating BIC; see [R] BIC note

```
. estimates store M9
.
.
.
. arima lnHi L7DWP L7LST L7NDVI if tin(2012w19, 2013w36), arima(1,1,2)
```

```
(setting optimization to BHHH)
Iteration 0: log likelihood = -8.8282908
Iteration 1: log likelihood = -7.7223218
Iteration 2: log likelihood = -7.5110544
Iteration 3: log likelihood = -7.4622259
Iteration 4: log likelihood = -7.3925485
(switching optimization to BFGS)
Iteration 5: log likelihood = -7.3866382
Iteration 6: log likelihood = -7.2243717
Iteration 7: log likelihood = -7.2086414
Iteration 8: log likelihood = -7.2064282
Iteration 9: log likelihood = -7.2041966
Iteration 10: log likelihood = -7.2038888
Iteration 11: log likelihood = -7.2038337
Iteration 12: log likelihood = -7.2038288
Iteration 13: log likelihood = -7.2038283
```

ARIMA regression

```
Sample: 2012w19 - 2013w36      Number of obs   =      70
                                Wald chi2(6)       =      46.38
Log likelihood = -7.203828     Prob > chi2    =      0.0000
```

|       |        | Coef.     | OPG<br>Std. Err. | z     | P> z  | [95% Conf. Interval] |          |
|-------|--------|-----------|------------------|-------|-------|----------------------|----------|
| ----- |        |           |                  |       |       |                      |          |
| lnHi  |        |           |                  |       |       |                      |          |
|       | L7DWP  |           |                  |       |       |                      |          |
|       | D1.    | .0345842  | .0156407         | 2.21  | 0.027 | .0039291             | .0652394 |
|       | L7LST  |           |                  |       |       |                      |          |
|       | D1.    | .1037044  | .027102          | 3.83  | 0.000 | .0505854             | .1568234 |
|       | L7NDVI |           |                  |       |       |                      |          |
|       | D1.    | 1.455246  | 1.175361         | 1.24  | 0.216 | -.8484194            | 3.758911 |
|       | _cons  | -.0136808 | .0368981         | -0.37 | 0.711 | -.0859997            | .0586381 |
| ----- |        |           |                  |       |       |                      |          |
| ARMA  |        |           |                  |       |       |                      |          |
|       | ar     |           |                  |       |       |                      |          |
|       | L1.    | .0423816  | .4368381         | 0.10  | 0.923 | -.8138054            | .8985686 |
|       | ma     |           |                  |       |       |                      |          |
|       | L1.    | -.4547861 | .4207564         | -1.08 | 0.280 | -1.279454            | .3698813 |
|       | L2.    | .3788203  | .157377          | 2.41  | 0.016 | .070367              | .6872735 |
| ----- |        |           |                  |       |       |                      |          |
|       | /sigma | .2674568  | .0276677         | 9.67  | 0.000 | .213229              | .3216845 |
| ----- |        |           |                  |       |       |                      |          |

Note: The test of the variance against zero is one sided, and the two-sided confidence interval is truncated at zero.

```
. estat ic
```

| Model | Obs | ll(null) | ll(model) | df | AIC      | BIC      |
|-------|-----|----------|-----------|----|----------|----------|
| .     | 70  | .        | -7.203828 | 8  | 30.40766 | 48.39562 |

Note: N=Obs used in calculating BIC; see [R] BIC note

```

. estimates store M10
.
.
.
. arima lnHi L7DWP L7LST L7NDVI if tin(2012w19, 2013w36), arima(3,1,1)

```

```

(setting optimization to BHHH)
Iteration 0: log likelihood = -9.8947282
Iteration 1: log likelihood = -7.9661504
Iteration 2: log likelihood = -7.9512108
Iteration 3: log likelihood = -7.9031224
Iteration 4: log likelihood = -7.7439446
(switching optimization to BFGS)
Iteration 5: log likelihood = -7.7340261
Iteration 6: log likelihood = -7.7332886
Iteration 7: log likelihood = -7.7292862
Iteration 8: log likelihood = -7.7272856
Iteration 9: log likelihood = -7.7259551
Iteration 10: log likelihood = -7.7259339
Iteration 11: log likelihood = -7.7259325
Iteration 12: log likelihood = -7.7259321

```

ARIMA regression

```

Sample: 2012w19 - 2013w36      Number of obs   =      70
                                Wald chi2(7)         =      46.09
Log likelihood = -7.725932     Prob > chi2      =      0.0000

```

|       |        | Coef.     | OPG<br>Std. Err. | z     | P> z  | [95% Conf. Interval] |          |
|-------|--------|-----------|------------------|-------|-------|----------------------|----------|
| ----- |        |           |                  |       |       |                      |          |
| lnHi  |        |           |                  |       |       |                      |          |
|       | L7DWP  |           |                  |       |       |                      |          |
|       | D1.    | .0345932  | .0176804         | 1.96  | 0.050 | -.0000598            | .0692462 |
|       | L7LST  |           |                  |       |       |                      |          |
|       | D1.    | .1002924  | .0267256         | 3.75  | 0.000 | .0479112             | .1526735 |
|       | L7NDVI |           |                  |       |       |                      |          |
|       | D1.    | 1.636917  | 1.24242          | 1.32  | 0.188 | -.7981826            | 4.072016 |
|       | _cons  | -.0139367 | .0340507         | -0.41 | 0.682 | -.0806747            | .0528014 |
| ----- |        |           |                  |       |       |                      |          |
| ARMA  |        |           |                  |       |       |                      |          |
|       | ar     |           |                  |       |       |                      |          |
|       | L1.    | -.3819334 | .9156339         | -0.42 | 0.677 | -2.176543            | 1.412676 |
|       | L2.    | .1164578  | .3879549         | 0.30  | 0.764 | -.6439197            | .8768354 |
|       | L3.    | .1705258  | .1185227         | 1.44  | 0.150 | -.0617745            | .4028261 |
|       | ma     |           |                  |       |       |                      |          |
|       | L1.    | -.0254976 | .9083686         | -0.03 | 0.978 | -1.805867            | 1.754872 |
| ----- |        |           |                  |       |       |                      |          |
|       | /sigma | .2696637  | .02742           | 9.83  | 0.000 | .2159215             | .3234059 |
| ----- |        |           |                  |       |       |                      |          |

Note: The test of the variance against zero is one sided, and the two-sided confidence interval is truncated at zero.

```

. estat ic

```

| Model | Obs | ll(null) | ll(model) | df | AIC      | BIC      |
|-------|-----|----------|-----------|----|----------|----------|
| .     | 70  | .        | -7.725932 | 9  | 33.45186 | 53.68832 |

Note: N=Obs used in calculating BIC; see [R] BIC note

```

. estimates store M11
.
.
. arima lnHi L7DWP L7LST L7NDVI if tin(2012w19, 2013w36), arima(1,1,3)

```

```

(setting optimization to BHHH)
Iteration 0: log likelihood = -9.0124757
Iteration 1: log likelihood = -7.6920569
Iteration 2: log likelihood = -7.1923682
Iteration 3: log likelihood = -7.156605
Iteration 4: log likelihood = -6.7850828
(switiching optimization to BFGS)
Iteration 5: log likelihood = -6.6404728
Iteration 6: log likelihood = -6.4705557
Iteration 7: log likelihood = -6.3715012
Iteration 8: log likelihood = -6.3343358
Iteration 9: log likelihood = -6.3262272
Iteration 10: log likelihood = -6.3213961
Iteration 11: log likelihood = -6.320881
Iteration 12: log likelihood = -6.3207013
Iteration 13: log likelihood = -6.3206908
Iteration 14: log likelihood = -6.3206901
(switiching optimization to BHHH)
Iteration 15: log likelihood = -6.32069
Iteration 16: log likelihood = -6.32069 (not concave)
Iteration 17: log likelihood = -6.32069
Iteration 18: log likelihood = -6.32069 (not concave)
Iteration 19: log likelihood = -6.32069
(switiching optimization to BFGS)
Iteration 20: log likelihood = -6.32069

```

ARIMA regression

```

Sample: 2012w19 - 2013w36          Number of obs   =          70
                                   Wald chi2(6)       =        168.54
Log likelihood = -6.32069          Prob > chi2    =         0.0000

```

|       |        | Coef.     | OPG<br>Std. Err. | z     | P> z  | [95% Conf. Interval] |           |
|-------|--------|-----------|------------------|-------|-------|----------------------|-----------|
| ----- |        |           |                  |       |       |                      |           |
| lnHi  |        |           |                  |       |       |                      |           |
|       | L7DWP  |           |                  |       |       |                      |           |
|       | D1.    | .0317592  | .0149325         | 2.13  | 0.033 | .0024921             | .0610264  |
|       | L7LST  |           |                  |       |       |                      |           |
|       | D1.    | .1101422  | .0278721         | 3.95  | 0.000 | .0555139             | .1647705  |
|       | L7NDVI |           |                  |       |       |                      |           |
|       | D1.    | 1.155587  | 1.214763         | 0.95  | 0.341 | -1.225305            | 3.53648   |
|       | _cons  | -.0145485 | .0397178         | -0.37 | 0.714 | -.0923939            | .063297   |
| ----- |        |           |                  |       |       |                      |           |
| ARMA  |        |           |                  |       |       |                      |           |
|       | ar     |           |                  |       |       |                      |           |
|       | L1.    | -.8914096 | .0922778         | -9.66 | 0.000 | -1.072271            | -.7105485 |
|       | ma     |           |                  |       |       |                      |           |
|       | L1.    | .5483937  | .                | .     | .     | .                    | .         |
|       | L2.    | -.0278404 | .2268625         | -0.12 | 0.902 | -.4724827            | .4168019  |
|       | L3.    | .4237658  | .1728267         | 2.45  | 0.014 | .0850316             | .7624999  |
| ----- |        |           |                  |       |       |                      |           |
|       | /sigma | .2611169  | .0355956         | 7.34  | 0.000 | .1913508             | .3308831  |
| ----- |        |           |                  |       |       |                      |           |

Note: The test of the variance against zero is one sided, and the two-sided confidence interval is truncated at zero.

. estat ic

| Model | Obs | ll(null) | ll(model) | df | AIC      | BIC      |
|-------|-----|----------|-----------|----|----------|----------|
| .     | 70  | .        | -6.32069  | 8  | 28.64138 | 46.62934 |

Note: N=Obs used in calculating BIC; see [R] BIC note

. estimates store M12

.

.

. arima lnHi L7DWP L7LST L7NDVI if tin(2012w19, 2013w36), arima(3,1,2)

(setting optimization to BHHH)

Iteration 0: log likelihood = -8.6528383

Iteration 1: log likelihood = -7.0150709

Iteration 2: log likelihood = -5.015495

Iteration 3: log likelihood = -3.9813145

Iteration 4: log likelihood = -3.0855802

(switching optimization to BFGS)

Iteration 5: log likelihood = -2.9508502

Iteration 6: log likelihood = -2.8920121

Iteration 7: log likelihood = -2.831044

Iteration 8: log likelihood = -2.788252

Iteration 9: log likelihood = -2.7751375

Iteration 10: log likelihood = -2.7676815

Iteration 11: log likelihood = -2.7671597

Iteration 12: log likelihood = -2.7670839

Iteration 13: log likelihood = -2.7670828

Iteration 14: log likelihood = -2.7670819

(switching optimization to BHHH)

Iteration 15: log likelihood = -2.7670818

Iteration 16: log likelihood = -2.7670818 (not concave)

Iteration 17: log likelihood = -2.7670818

Iteration 18: log likelihood = -2.7670818 (not concave)

Iteration 19: log likelihood = -2.7670818 (not concave)

(switching optimization to BFGS)

Iteration 20: log likelihood = -2.7670818

ARIMA regression

|                            |               |   |        |
|----------------------------|---------------|---|--------|
| Sample: 2012w19 - 2013w36  | Number of obs | = | 70     |
|                            | Wald chi2(7)  | = | 193.48 |
| Log likelihood = -2.767082 | Prob > chi2   | = | 0.0000 |

| D.lnHi | Coef.     | OPG Std. Err. | z     | P> z  | [95% Conf. Interval] |
|--------|-----------|---------------|-------|-------|----------------------|
| lnHi   |           |               |       |       |                      |
| L7DWP  |           |               |       |       |                      |
| D1.    | .0348577  | .0096329      | 3.62  | 0.000 | .0159775 .0537379    |
| L7LST  |           |               |       |       |                      |
| D1.    | .0769016  | .0237688      | 3.24  | 0.001 | .0303156 .1234876    |
| L7NDVI |           |               |       |       |                      |
| D1.    | .8263544  | .8516829      | 0.97  | 0.332 | -.8429134 2.495622   |
| _cons  | -.0172087 | .0325314      | -0.53 | 0.597 | -.080969 .0465517    |

ARMA

| ar  |           |          |       |       |           |           |
|-----|-----------|----------|-------|-------|-----------|-----------|
| L1. | -.1348012 | .1681095 | -0.80 | 0.423 | -.4642897 | .1946873  |
| L2. | -.5763686 | .1472674 | -3.91 | 0.000 | -.8650074 | -.2877298 |
| L3. | -.0719062 | .1325071 | -0.54 | 0.587 | -.3316154 | .1878029  |

|        |  |           |          |       |       |           |           |
|--------|--|-----------|----------|-------|-------|-----------|-----------|
| ma     |  |           |          |       |       |           |           |
| L1.    |  | -.2892138 | .1261007 | -2.29 | 0.022 | -.5363667 | -.0420609 |
| L2.    |  | .9999992  | .        | .     | .     | .         | .         |
| -----  |  |           |          |       |       |           |           |
| /sigma |  | .2424099  | .0252213 | 9.61  | 0.000 | .1929769  | .2918428  |
| -----  |  |           |          |       |       |           |           |

Note: The test of the variance against zero is one sided, and the two-sided confidence interval is truncated at zero.

.  
. estat ic

|       |  |     |          |           |    |          |          |
|-------|--|-----|----------|-----------|----|----------|----------|
| Model |  | Obs | ll(null) | ll(model) | df | AIC      | BIC      |
| .     |  | 70  | .        | -2.767082 | 9  | 23.53416 | 43.77062 |

Note: N=Obs used in calculating BIC; see [R] BIC note

. estimates store M13

. arima lnHi L7DWP L7LST L7NDVI if tin(2012w19, 2013w36), arima(2,1,3)

(setting optimization to BHHH)

Iteration 0: log likelihood = -8.0199815  
 Iteration 1: log likelihood = -7.9145683  
 Iteration 2: log likelihood = -5.1392213  
 Iteration 3: log likelihood = -4.4336346  
 Iteration 4: log likelihood = -3.578524

(switching optimization to BFGS)

Iteration 5: log likelihood = -3.3759562  
 Iteration 6: log likelihood = -3.0840791  
 Iteration 7: log likelihood = -2.9784461  
 Iteration 8: log likelihood = -2.8304522  
 Iteration 9: log likelihood = -2.8060936  
 Iteration 10: log likelihood = -2.7941439  
 Iteration 11: log likelihood = -2.7927727  
 Iteration 12: log likelihood = -2.7923574  
 Iteration 13: log likelihood = -2.7923339  
 Iteration 14: log likelihood = -2.7923294

(switching optimization to BHHH)

Iteration 15: log likelihood = -2.7923285 (not concave)  
 Iteration 16: log likelihood = -2.7923284 (not concave)  
 Iteration 17: log likelihood = -2.7923284 (not concave)  
 Iteration 18: log likelihood = -2.7923284 (not concave)  
 Iteration 19: log likelihood = -2.7923284 (not concave)

(switching optimization to BFGS)

Iteration 20: log likelihood = -2.7923284

ARIMA regression

Sample: 2012w19 - 2013w36                      Number of obs        =        70  
                                                  Wald chi2(8)        =        166.96  
 Log likelihood = -2.792328                      Prob > chi2         =        0.0000

|        |  |          |           |      |       |                      |          |
|--------|--|----------|-----------|------|-------|----------------------|----------|
| -----  |  |          |           |      |       |                      |          |
|        |  | OPG      |           |      |       |                      |          |
| D.lnHi |  | Coef.    | Std. Err. | z    | P> z  | [95% Conf. Interval] |          |
| -----  |  |          |           |      |       |                      |          |
| lnHi   |  |          |           |      |       |                      |          |
| L7DWP  |  |          |           |      |       |                      |          |
| D1.    |  | .0349159 | .0103958  | 3.36 | 0.001 | .0145406             | .0552912 |
| L7LST  |  |          |           |      |       |                      |          |
| D1.    |  | .076839  | .0242775  | 3.17 | 0.002 | .0292559             | .124422  |
| L7NDVI |  |          |           |      |       |                      |          |



|        |  |           |          |       |       |           |           |
|--------|--|-----------|----------|-------|-------|-----------|-----------|
| D1.    |  | .8044022  | .8430883 | 0.95  | 0.340 | -.8480205 | 2.456825  |
| _cons  |  | -.0172645 | .0327839 | -0.53 | 0.598 | -.0815198 | .0469907  |
| -----  |  |           |          |       |       |           |           |
| ARMA   |  |           |          |       |       |           |           |
| ar     |  |           |          |       |       |           |           |
| L1.    |  | -.0193171 | .2970429 | -0.07 | 0.948 | -.6015105 | .5628764  |
| L2.    |  | -.5627712 | .1675782 | -3.36 | 0.001 | -.8912184 | -.2343239 |
| ma     |  |           |          |       |       |           |           |
| L1.    |  | -.3991312 | 205.9648 | -0.00 | 0.998 | -404.0828 | 403.2846  |
| L2.    |  | 1.031316  | 1434.685 | 0.00  | 0.999 | -2810.9   | 2812.963  |
| L3.    |  | -.1072889 | 151.3947 | -0.00 | 0.999 | -296.8354 | 296.6208  |
| -----  |  |           |          |       |       |           |           |
| /sigma |  | .2424148  | 171.2294 | 0.00  | 0.499 | 0         | 335.8458  |
| -----  |  |           |          |       |       |           |           |

Note: The test of the variance against zero is one sided, and the two-sided confidence interval is truncated at zero.

```
.
. estat ic
```

| Model | Obs | ll(null) | ll(model) | df | AIC      | BIC      |
|-------|-----|----------|-----------|----|----------|----------|
| .     | 70  | .        | -2.792328 | 10 | 25.58466 | 48.06961 |

Note: N=Obs used in calculating BIC; see [R] BIC note

```
.
. estimates store M14
.
.
.
. arima lnHi L7DWP L7LST L7NDVI if tin(2012w19, 2013w36), arima(3,1,3)
```

```
(setting optimization to BHHH)
Iteration 0: log likelihood = -8.6164103
Iteration 1: log likelihood = -5.9962298
Iteration 2: log likelihood = -5.3176578
Iteration 3: log likelihood = -5.011704
Iteration 4: log likelihood = -4.8691457
(switching optimization to BFGS)
Iteration 5: log likelihood = -3.7712148
Iteration 6: log likelihood = -3.6981822
Iteration 7: log likelihood = -3.6091857
Iteration 8: log likelihood = -3.1931136
Iteration 9: log likelihood = -3.0671351
Iteration 10: log likelihood = -3.040837
Iteration 11: log likelihood = -3.0315237
Iteration 12: log likelihood = -3.0242991
Iteration 13: log likelihood = -2.731562
Iteration 14: log likelihood = -2.7181047
(switching optimization to BHHH)
Iteration 15: log likelihood = -2.6839524
Iteration 16: log likelihood = -2.6804678
Iteration 17: log likelihood = -2.6795559 (backed up)
Iteration 18: log likelihood = -2.6794514 (backed up)
Iteration 19: log likelihood = -2.6793132 (backed up)
(switching optimization to BFGS)
Iteration 20: log likelihood = -2.6793074 (backed up)
Iteration 21: log likelihood = -2.6782521
Iteration 22: log likelihood = -2.6753716
Iteration 23: log likelihood = -2.6728943
Iteration 24: log likelihood = -2.6711223
Iteration 25: log likelihood = -2.6703488
Iteration 26: log likelihood = -2.670318
Iteration 27: log likelihood = -2.670309
Iteration 28: log likelihood = -2.6703087
```

ARIMA regression

Sample: 2012w19 - 2013w36                      Number of obs        =        70  
 Wald chi2(8)                                    =        168.32  
 Log likelihood = -2.670309                    Prob > chi2           =        0.0000

```
-----+-----
```

|             |        | OPG       |           |       |       |           | [95% Conf. Interval] |  |
|-------------|--------|-----------|-----------|-------|-------|-----------|----------------------|--|
| D.lnHi      |        | Coef.     | Std. Err. | z     | P> z  |           |                      |  |
| -----+----- |        |           |           |       |       |           |                      |  |
| lnHi        |        |           |           |       |       |           |                      |  |
|             | L7DWP  |           |           |       |       |           |                      |  |
|             | D1.    | .0329735  | .0095359  | 3.46  | 0.001 | .0142836  | .0516635             |  |
|             | L7LST  |           |           |       |       |           |                      |  |
|             | D1.    | .0822982  | .0247753  | 3.32  | 0.001 | .0337395  | .1308569             |  |
|             | L7NDVI |           |           |       |       |           |                      |  |
|             | D1.    | .5561476  | .8133168  | 0.68  | 0.494 | -1.037924 | 2.150219             |  |
|             | _cons  | -.0180114 | .0358244  | -0.50 | 0.615 | -.088226  | .0522031             |  |
| -----+----- |        |           |           |       |       |           |                      |  |
| ARMA        |        |           |           |       |       |           |                      |  |
|             | ar     |           |           |       |       |           |                      |  |
|             | L1.    | -1.031663 | .184019   | -5.61 | 0.000 | -1.392334 | -.6709928            |  |
|             | L2.    | -.6238293 | .2429746  | -2.57 | 0.010 | -1.100051 | -.1476079            |  |
|             | L3.    | -.5086514 | .1744341  | -2.92 | 0.004 | -.8505359 | -.1667668            |  |
|             | ma     |           |           |       |       |           |                      |  |
|             | L1.    | .7009178  | .2783042  | 2.52  | 0.012 | .1554515  | 1.246384             |  |
|             | L2.    | .6902129  | .2758946  | 2.50  | 0.012 | .1494694  | 1.230956             |  |
|             | L3.    | 1.008189  | .         | .     | .     | .         | .                    |  |
|             | /sigma | .2384445  | .0282472  | 8.44  | 0.000 | .183081   | .2938081             |  |
| -----+----- |        |           |           |       |       |           |                      |  |

Note: The test of the variance against zero is one sided, and the two-sided confidence interval is truncated at zero.

. estat ic

```
-----+-----
```

| Model | Obs | ll(null) | ll(model) | df | AIC      | BIC      |
|-------|-----|----------|-----------|----|----------|----------|
| .     | 70  | .        | -2.670309 | 10 | 25.34062 | 47.82557 |

```
-----+-----
```

Note: N=Obs used in calculating BIC; see [R] BIC note

. estimates store M15  
 .  
 .  
 .  
 . arima lnHi L7DWP L7LST L7NDVI if tin(2012w19, 2013w36), arima(4,1,3)

(setting optimization to BHHH)  
 Iteration 0: log likelihood = -8.949288  
 Iteration 1: log likelihood = -7.2044002  
 Iteration 2: log likelihood = -4.8597779  
 Iteration 3: log likelihood = -4.4064908  
 Iteration 4: log likelihood = -3.9327419  
 (switching optimization to BFGS)  
 Iteration 5: log likelihood = -3.9194041  
 Iteration 6: log likelihood = -3.7087738  
 Iteration 7: log likelihood = -2.732742  
 Iteration 8: log likelihood = -2.6252262  
 Iteration 9: log likelihood = -2.5779896  
 Iteration 10: log likelihood = -2.4880842  
 Iteration 11: log likelihood = -2.3682911  
 Iteration 12: log likelihood = -2.3226854

```

Iteration 13: log likelihood = -2.3126716
Iteration 14: log likelihood = -2.310756
(switcing optimization to BHHH)
Iteration 15: log likelihood = -2.3098801
Iteration 16: log likelihood = -2.3098793 (backed up)
Iteration 17: log likelihood = -2.3098791 (backed up)
Iteration 18: log likelihood = -2.3098786 (backed up)
Iteration 19: log likelihood = -2.3098786 (backed up)
(switcing optimization to BFGS)
Iteration 20: log likelihood = -2.3098786 (backed up)
Iteration 21: log likelihood = -2.3097655
Iteration 22: log likelihood = -2.309695
Iteration 23: log likelihood = -2.3096902
Iteration 24: log likelihood = -2.3096118
Iteration 25: log likelihood = -2.3096052
Iteration 26: log likelihood = -2.3095915
Iteration 27: log likelihood = -2.3095913

```

ARIMA regression

```

Sample: 2012w19 - 2013w36      Number of obs   =      70
                               Wald chi2(9)         =     153.60
Log likelihood = -2.309591     Prob > chi2      =      0.0000

```

|       |        | Coef.     | OPG<br>Std. Err. | z     | P> z  | [95% Conf. Interval] |           |
|-------|--------|-----------|------------------|-------|-------|----------------------|-----------|
| ----- |        |           |                  |       |       |                      |           |
| lnHi  |        |           |                  |       |       |                      |           |
|       | L7DWP  |           |                  |       |       |                      |           |
|       | D1.    | .0321944  | .0096359         | 3.34  | 0.001 | .0133083             | .0510804  |
|       | L7LST  |           |                  |       |       |                      |           |
|       | D1.    | .0852062  | .0253795         | 3.36  | 0.001 | .0354633             | .134949   |
|       | L7NDVI |           |                  |       |       |                      |           |
|       | D1.    | .6550234  | .8970877         | 0.73  | 0.465 | -1.103236            | 2.413283  |
|       | _cons  | -.01816   | .033887          | -0.54 | 0.592 | -.0845773            | .0482572  |
| ----- |        |           |                  |       |       |                      |           |
| ARMA  |        |           |                  |       |       |                      |           |
|       | ar     |           |                  |       |       |                      |           |
|       | L1.    | -1.074796 | .1888255         | -5.69 | 0.000 | -1.444887            | -.7047045 |
|       | L2.    | -.692571  | .2729863         | -2.54 | 0.011 | -1.227614            | -.1575276 |
|       | L3.    | -.6216079 | .2113414         | -2.94 | 0.003 | -1.035829            | -.2073863 |
|       | L4.    | -.1127244 | .1497059         | -0.75 | 0.451 | -.4061425            | .1806936  |
|       | ma     |           |                  |       |       |                      |           |
|       | L1.    | .6923859  | 277.1136         | 0.00  | 0.998 | -542.4404            | 543.8251  |
|       | L2.    | .6923966  | 277.1392         | 0.00  | 0.998 | -542.4905            | 543.8752  |
|       | L3.    | .9999917  | .                | .     | .     | .                    | .         |
|       | /sigma | .2386096  | .0294169         | 8.11  | 0.000 | .1809535             | .2962658  |
| ----- |        |           |                  |       |       |                      |           |

Note: The test of the variance against zero is one sided, and the two-sided confidence interval is truncated at zero.

```

. estat ic

```

| Model | Obs | ll(null) | ll(model) | df | AIC      | BIC      |
|-------|-----|----------|-----------|----|----------|----------|
| .     | 70  | .        | -2.309591 | 11 | 26.61918 | 51.35263 |

Note: N=Obs used in calculating BIC; see [R] BIC note

```

. estimates store M16

```

```
.  
. arima lnHi L7DWP L7LST L7NDVI if tin(2012w19, 2013w36), arima(3,1,4)
```

```
(setting optimization to BHHH)  
Iteration 0: log likelihood = -9.3827505  
Iteration 1: log likelihood = -9.1189029  
Iteration 2: log likelihood = -8.0685974  
Iteration 3: log likelihood = -8.0377924  
Iteration 4: log likelihood = -7.4603563  
(switching optimization to BFGS)  
Iteration 5: log likelihood = -4.3254709  
Iteration 6: log likelihood = -3.9883552  
Iteration 7: log likelihood = -3.9393892  
Iteration 8: log likelihood = -3.1549791  
Iteration 9: log likelihood = -2.9573042  
Iteration 10: log likelihood = -2.3665009  
Iteration 11: log likelihood = -1.8867526  
Iteration 12: log likelihood = -1.7922045  
Iteration 13: log likelihood = -1.7311258  
Iteration 14: log likelihood = -1.5885524  
(switching optimization to BHHH)  
Iteration 15: log likelihood = -1.4741346  
Iteration 16: log likelihood = -1.3672796  
Iteration 17: log likelihood = -1.1883708  
Iteration 18: log likelihood = -1.0896302  
Iteration 19: log likelihood = -.95133313  
(switching optimization to BFGS)  
Iteration 20: log likelihood = -.56232136  
Iteration 21: log likelihood = -.34832387  
Iteration 22: log likelihood = -.11111049  
Iteration 23: log likelihood = -.08789023  
Iteration 24: log likelihood = .22166144  
Iteration 25: log likelihood = .33353928  
Iteration 26: log likelihood = .39507182  
Iteration 27: log likelihood = .44010958  
Iteration 28: log likelihood = .45838253  
Iteration 29: log likelihood = .46087788  
(switching optimization to BHHH)  
Iteration 30: log likelihood = .46529517  
Iteration 31: log likelihood = .46598436 (backed up)  
Iteration 32: log likelihood = .46598683 (backed up)  
Iteration 33: log likelihood = .4659948 (backed up)  
Iteration 34: log likelihood = .46599507 (backed up)  
(switching optimization to BFGS)  
Iteration 35: log likelihood = .4659954 (backed up)  
Iteration 36: log likelihood = .4674284  
Iteration 37: log likelihood = .46762752  
Iteration 38: log likelihood = .46789905  
Iteration 39: log likelihood = .46797455  
Iteration 40: log likelihood = .46803834  
Iteration 41: log likelihood = .4680605  
Iteration 42: log likelihood = .46807355  
Iteration 43: log likelihood = .46807411  
Iteration 44: log likelihood = .46807872  
(switching optimization to BHHH)  
Iteration 45: log likelihood = .46807887 (not concave)  
Iteration 46: log likelihood = .46807894 (not concave)  
Iteration 47: log likelihood = .46807895 (not concave)  
Iteration 48: log likelihood = .46807896 (not concave)  
Iteration 49: log likelihood = .46807896 (not concave)  
(switching optimization to BFGS)  
Iteration 50: log likelihood = .46807896  
Iteration 51: log likelihood = .46807896
```

ARIMA regression

```
Sample: 2012w19 - 2013w36  
Log likelihood = .468079  
Number of obs = 70  
Wald chi2(9) = 1.65e+06  
Prob > chi2 = 0.0000
```

|        |        | OPG       |           |        |       |                      |
|--------|--------|-----------|-----------|--------|-------|----------------------|
| D.lnHi |        | Coef.     | Std. Err. | z      | P> z  | [95% Conf. Interval] |
| lnHi   | L7DWP  |           |           |        |       |                      |
|        | D1.    | .034341   | .0104383  | 3.29   | 0.001 | .0138823 .0547996    |
|        | L7LST  |           |           |        |       |                      |
|        | D1.    | .0906228  | .025188   | 3.60   | 0.000 | .0412553 .1399903    |
|        | L7NDVI |           |           |        |       |                      |
|        | D1.    | 1.147173  | .6944325  | 1.65   | 0.099 | -.2138892 2.508236   |
|        | _cons  | -.0110905 | .0415753  | -0.27  | 0.790 | -.0925766 .0703957   |
| ARMA   | ar     |           |           |        |       |                      |
|        | L1.    | -.5645081 | .2146319  | -2.63  | 0.009 | -.9851789 -.1438372  |
|        | L2.    | -1.073145 | .0758612  | -14.15 | 0.000 | -1.22183 -.9244596   |
|        | L3.    | -.2058557 | .2080339  | -0.99  | 0.322 | -.6135946 .2018832   |
|        | ma     |           |           |        |       |                      |
|        | L1.    | .2389678  | .1924707  | 1.24   | 0.214 | -.1382677 .6162034   |
|        | L2.    | 1.660302  | .         | .      | .     | .                    |
|        | L3.    | .1293803  | .1883829  | 0.69   | 0.492 | -.2398434 .4986039   |
|        | L4.    | .7197922  | .0816351  | 8.82   | 0.000 | .5597904 .8797941    |
|        | /sigma | .2268819  | .0254074  | 8.93   | 0.000 | .1770844 .2766794    |

Note: The test of the variance against zero is one sided, and the two-sided confidence interval is truncated at zero.

```
. estat ic
```

| Model | Obs | ll(null) | ll(model) | df | AIC      | BIC      |
|-------|-----|----------|-----------|----|----------|----------|
| .     | 70  | .        | .468079   | 11 | 21.06384 | 45.79729 |

Note: N=Obs used in calculating BIC; see [R] BIC note

```
. estimates store M17
```

```
.
.
.
.
. arima lnHi L7DWP L7LST L7NDVI if tin(2012w19, 2013w36), arima(4,1,4)
```

```
(setting optimization to BHHH)
Iteration 0: log likelihood = -7.4185338
Iteration 1: log likelihood = -6.7065407
Iteration 2: log likelihood = -6.6487751 (backed up)
Iteration 3: log likelihood = -5.029474
Iteration 4: log likelihood = -4.2432919
(swimming optimization to BFGS)
Iteration 5: log likelihood = -3.2087299
Iteration 6: log likelihood = -3.0656215
Iteration 7: log likelihood = -1.6122322
Iteration 8: log likelihood = -1.5177742 (backed up)
Iteration 9: log likelihood = -1.2153631
Iteration 10: log likelihood = -.97954177
Iteration 11: log likelihood = -.91109133
Iteration 12: log likelihood = -.87299925
Iteration 13: log likelihood = -.85220552
Iteration 14: log likelihood = -.83489047
(swimming optimization to BHHH)
Iteration 15: log likelihood = -.81889539
Iteration 16: log likelihood = -.81886883 (backed up)
```

```

Iteration 17: log likelihood = -.81883558 (backed up)
Iteration 18: log likelihood = -.81882925 (backed up)
Iteration 19: log likelihood = -.81882563 (backed up)
(switching optimization to BFGS)
Iteration 20: log likelihood = -.81882558 (backed up)
Iteration 21: log likelihood = -.81641083
Iteration 22: log likelihood = -.81536936
Iteration 23: log likelihood = -.81474346
Iteration 24: log likelihood = -.81445366
Iteration 25: log likelihood = -.81444099
Iteration 26: log likelihood = -.81442041
Iteration 27: log likelihood = -.81441586
Iteration 28: log likelihood = -.8144144
Iteration 29: log likelihood = -.81441431

```

ARIMA regression

```

Sample: 2012w19 - 2013w36           Number of obs   =           70
                                   Wald chi2(10)      =          142.62
Log likelihood = -.8144143          Prob > chi2     =           0.0000

```

|        |           | OPG       |       |       |                      |  |
|--------|-----------|-----------|-------|-------|----------------------|--|
| D.lnHi | Coef.     | Std. Err. | z     | P> z  | [95% Conf. Interval] |  |
| -----  |           |           |       |       |                      |  |
| lnHi   |           |           |       |       |                      |  |
| L7DWP  |           |           |       |       |                      |  |
| D1.    | .0354344  | .0109965  | 3.22  | 0.001 | .0138817 .056987     |  |
| L7LST  |           |           |       |       |                      |  |
| D1.    | .08113    | .0240324  | 3.38  | 0.001 | .0340273 .1282327    |  |
| L7NDVI |           |           |       |       |                      |  |
| D1.    | .8966042  | .7538393  | 1.19  | 0.234 | -.5808937 2.374102   |  |
| _cons  | -.0105454 | .0093561  | -1.13 | 0.260 | -.028883 .0077923    |  |
| -----  |           |           |       |       |                      |  |
| ARMA   |           |           |       |       |                      |  |
| ar     |           |           |       |       |                      |  |
| L1.    | -.1652131 | .2014606  | -0.82 | 0.412 | -.5600686 .2296424   |  |
| L2.    | .2569096  | .2240266  | 1.15  | 0.251 | -.1821745 .6959936   |  |
| L3.    | -.0211734 | .1923321  | -0.11 | 0.912 | -.3981373 .3557905   |  |
| L4.    | .3959794  | .1987356  | 1.99  | 0.046 | .0064648 .785494     |  |
| ma     |           |           |       |       |                      |  |
| L1.    | -.2766778 | 2891.702  | -0.00 | 1.000 | -5667.908 5667.355   |  |
| L2.    | -.0254686 | 5840.076  | -0.00 | 1.000 | -11446.36 11446.31   |  |
| L3.    | .3217963  | 2948.522  | 0.00  | 1.000 | -5778.674 5779.318   |  |
| L4.    | -1.01965  | .         | .     | .     | .                    |  |
| /sigma | .2271688  | .0294384  | 7.72  | 0.000 | .1694706 .2848669    |  |
| -----  |           |           |       |       |                      |  |

Note: The test of the variance against zero is one sided, and the two-sided confidence interval is truncated at zero.

```
. estat ic
```

| Model | Obs | ll(null) | ll(model) | df | AIC      | BIC      |
|-------|-----|----------|-----------|----|----------|----------|
| .     | 70  | .        | -.8144143 | 12 | 25.62883 | 52.61077 |

Note: N=Obs used in calculating BIC; see [R] BIC note

```
. estimates store M18
```

```
.
.
.
```

. arima lnHi L7DWP L7LST L7NDVI if tin(2012w19, 2013w36), arima(5,1,4)

```
(setting optimization to BHHH)
Iteration 0: log likelihood = -8.6660413
Iteration 1: log likelihood = -7.4933281
Iteration 2: log likelihood = -6.6001479
Iteration 3: log likelihood = -4.9265265
Iteration 4: log likelihood = -3.0815571
(swimming optimization to BFGS)
Iteration 5: log likelihood = -3.0497983
Iteration 6: log likelihood = -2.4608418
Iteration 7: log likelihood = -2.1256286
Iteration 8: log likelihood = -1.9522951
Iteration 9: log likelihood = -1.9092147
Iteration 10: log likelihood = -1.8852196
Iteration 11: log likelihood = -1.8651819
Iteration 12: log likelihood = -1.8484328
Iteration 13: log likelihood = -1.751299
Iteration 14: log likelihood = -1.6314613
(swimming optimization to BHHH)
Iteration 15: log likelihood = -1.6254892
Iteration 16: log likelihood = -1.6123204 (backed up)
Iteration 17: log likelihood = -1.5871101
Iteration 18: log likelihood = -1.5610015
Iteration 19: log likelihood = -1.5532594 (backed up)
(swimming optimization to BFGS)
Iteration 20: log likelihood = -1.546313 (backed up)
Iteration 21: log likelihood = -1.5287667
Iteration 22: log likelihood = -1.4694058
Iteration 23: log likelihood = -1.3165206
Iteration 24: log likelihood = -1.2329469
Iteration 25: log likelihood = -1.1991476
Iteration 26: log likelihood = -1.1990275
Iteration 27: log likelihood = -1.1867903
Iteration 28: log likelihood = -1.1867751
Iteration 29: log likelihood = -1.1865219
(swimming optimization to BHHH)
Iteration 30: log likelihood = -1.1865143
Iteration 31: log likelihood = -1.1865141 (backed up)
Iteration 32: log likelihood = -1.1865141 (backed up)
Iteration 33: log likelihood = -1.1865141 (backed up)
Iteration 34: log likelihood = -1.186514 (backed up)
(swimming optimization to BFGS)
Iteration 35: log likelihood = -1.186514 (backed up)
Iteration 36: log likelihood = -1.1865129 (backed up)
Iteration 37: log likelihood = -1.1865098
Iteration 38: log likelihood = -1.1865075
Iteration 39: log likelihood = -1.1865071
Iteration 40: log likelihood = -1.186507
```

ARIMA regression

```
Sample: 2012w19 - 2013w36          Number of obs   =          70
                                Wald chi2(10)        =        302.86
Log likelihood = -1.186507         Prob > chi2      =         0.0000
```

|      |        | Coef.     | OPG<br>Std. Err. | z     | P> z  | [95% Conf. Interval] |          |
|------|--------|-----------|------------------|-------|-------|----------------------|----------|
| lnHi |        |           |                  |       |       |                      |          |
|      | L7DWP  |           |                  |       |       |                      |          |
|      | D1.    | .0280905  | .0123336         | 2.28  | 0.023 | .0039171             | .052264  |
|      | L7LST  |           |                  |       |       |                      |          |
|      | D1.    | .097955   | .0231786         | 4.23  | 0.000 | .0525259             | .1433842 |
|      | L7NDVI |           |                  |       |       |                      |          |
|      | D1.    | 1.237662  | .9204173         | 1.34  | 0.179 | -.5663227            | 3.041647 |
|      | _cons  | -.0122279 | .034179          | -0.36 | 0.721 | -.0792175            | .0547617 |

```
-----
```

| ARMA   |           |          |       |       |           |           |
|--------|-----------|----------|-------|-------|-----------|-----------|
| ar     |           |          |       |       |           |           |
| L1.    | -1.494209 | .539063  | -2.77 | 0.006 | -2.550754 | -.4376654 |
| L2.    | -1.232403 | .7607255 | -1.62 | 0.105 | -2.723398 | .2585914  |
| L3.    | -.8083907 | .7093903 | -1.14 | 0.254 | -2.19877  | .5819888  |
| L4.    | .050606   | .5727281 | 0.09  | 0.930 | -1.07192  | 1.173132  |
| L5.    | .2338987  | .1857721 | 1.26  | 0.208 | -.130208  | .5980053  |
| ma     |           |          |       |       |           |           |
| L1.    | 1.153361  | .        | .     | .     | .         | .         |
| L2.    | 1.152874  | .4760735 | 2.42  | 0.015 | .2197872  | 2.085961  |
| L3.    | 1.155986  | .        | .     | .     | .         | .         |
| L4.    | .1564729  | .5045041 | 0.31  | 0.756 | -.8323369 | 1.145283  |
| /sigma |           |          |       |       |           |           |
|        | .2330919  | .0744154 | 3.13  | 0.001 | .0872404  | .3789435  |

```
-----
```

Note: The test of the variance against zero is one sided, and the two-sided confidence interval is truncated at zero.

```
. estat ic
```

```
-----
```

| Model | Obs | ll(null) | ll(model) | df | AIC      | BIC      |
|-------|-----|----------|-----------|----|----------|----------|
| .     | 70  | .        | -1.186507 | 12 | 26.37301 | 53.35496 |

```
-----
```

Note: N=Obs used in calculating BIC; see [R] BIC note

```
. estimates store M19
```

```
.
.
.
.
. arima lnHi L7DWP L7LST L7NDVI if tin(2012w19, 2013w36), arima(4,1,5)
```

```
(setting optimization to BHHH)
Iteration 0: log likelihood = -8.3758502
Iteration 1: log likelihood = -7.2040162
Iteration 2: log likelihood = -6.9245898
Iteration 3: log likelihood = -5.4282582
Iteration 4: log likelihood = -5.4101131
(switching optimization to BFGS)
Iteration 5: log likelihood = -4.4119618
Iteration 6: log likelihood = -3.9043452 (backed up)
Iteration 7: log likelihood = -3.7229266 (backed up)
Iteration 8: log likelihood = -3.4317284
Iteration 9: log likelihood = -3.2365334
Iteration 10: log likelihood = -3.014677
Iteration 11: log likelihood = -2.1755105
Iteration 12: log likelihood = -1.9069537
Iteration 13: log likelihood = -1.7637311
Iteration 14: log likelihood = -1.5559286
(switching optimization to BHHH)
Iteration 15: log likelihood = -1.4732786
Iteration 16: log likelihood = -1.2539688
Iteration 17: log likelihood = -1.2513287
Iteration 18: log likelihood = -1.1434955
Iteration 19: log likelihood = -.91513965
(switching optimization to BFGS)
Iteration 20: log likelihood = -.55701077
Iteration 21: log likelihood = -.13032222
Iteration 22: log likelihood = -.06174204
Iteration 23: log likelihood = .03395064
Iteration 24: log likelihood = .04272021
Iteration 25: log likelihood = .19725636
Iteration 26: log likelihood = .27626549
Iteration 27: log likelihood = .35741815
Iteration 28: log likelihood = .47111688
```



Iteration 29: log likelihood = .50297974  
(switching optimization to BHHH)  
Iteration 30: log likelihood = .66206583  
Iteration 31: log likelihood = .66275296 (backed up)  
Iteration 32: log likelihood = .70532878  
Iteration 33: log likelihood = .99362873  
Iteration 34: log likelihood = .99743614 (backed up)  
(switching optimization to BFGS)  
Iteration 35: log likelihood = 1.1032547  
Iteration 36: log likelihood = 1.2091644  
Iteration 37: log likelihood = 1.3606033  
Iteration 38: log likelihood = 1.4093994  
Iteration 39: log likelihood = 1.4178106 (backed up)  
Iteration 40: log likelihood = 1.5967605  
Iteration 41: log likelihood = 1.6475316  
Iteration 42: log likelihood = 1.7164017  
Iteration 43: log likelihood = 1.7409038  
Iteration 44: log likelihood = 1.7464563  
(switching optimization to BHHH)  
Iteration 45: log likelihood = 1.7492166  
Iteration 46: log likelihood = 1.7492174 (backed up)  
Iteration 47: log likelihood = 1.7492176 (not concave)  
Iteration 48: log likelihood = 1.7621849  
Iteration 49: log likelihood = 1.7623786 (backed up)  
(switching optimization to BFGS)  
Iteration 50: log likelihood = 1.7647331 (backed up)  
Iteration 51: log likelihood = 1.7704945  
Iteration 52: log likelihood = 1.7741873  
Iteration 53: log likelihood = 1.775171  
Iteration 54: log likelihood = 1.7756693  
Iteration 55: log likelihood = 1.7777921  
Iteration 56: log likelihood = 1.7810642  
Iteration 57: log likelihood = 1.7812222  
Iteration 58: log likelihood = 1.781691  
Iteration 59: log likelihood = 1.7817063  
(switching optimization to BHHH)  
Iteration 60: log likelihood = 1.7818446  
Iteration 61: log likelihood = 1.7818449 (backed up)  
Iteration 62: log likelihood = 1.781845 (not concave)  
Iteration 63: log likelihood = 1.7818503  
Iteration 64: log likelihood = 1.7818504 (not concave)  
(switching optimization to BFGS)  
Iteration 65: log likelihood = 1.7818511  
Iteration 66: log likelihood = 1.7818511 (backed up)  
Iteration 67: log likelihood = 1.7818511 (backed up)  
Iteration 68: log likelihood = 1.7818519 (backed up)  
Iteration 69: log likelihood = 1.7818521 (backed up)  
Iteration 70: log likelihood = 1.7818522 (backed up)  
Iteration 71: log likelihood = 1.7818525 (backed up)  
Iteration 72: log likelihood = 1.7818526 (backed up)  
Iteration 73: log likelihood = 1.7818526 (backed up)  
Iteration 74: log likelihood = 1.7818531  
(switching optimization to BHHH)  
Iteration 75: log likelihood = 1.7818533 (not concave)  
Iteration 76: log likelihood = 1.7818537  
Iteration 77: log likelihood = 1.7818537 (not concave)  
Iteration 78: log likelihood = 1.7818538 (not concave)  
Iteration 79: log likelihood = 1.7818539 (not concave)  
(switching optimization to BFGS)  
Iteration 80: log likelihood = 1.7818539  
Iteration 81: log likelihood = 1.7818542 (backed up)  
Iteration 82: log likelihood = 1.7818544 (backed up)  
Iteration 83: log likelihood = 1.7818545 (backed up)  
Iteration 84: log likelihood = 1.7818545 (backed up)  
Iteration 85: log likelihood = 1.7818545 (backed up)  
Iteration 86: log likelihood = 1.7818545 (backed up)  
Iteration 87: log likelihood = 1.7818545 (backed up)  
Iteration 88: log likelihood = 1.7818546 (backed up)  
Iteration 89: log likelihood = 1.7818546 (backed up)  
(switching optimization to BHHH)  
Iteration 90: log likelihood = 1.7818546 (not concave)

```

Iteration 91: log likelihood = 1.7818546 (not concave)
Iteration 92: log likelihood = 1.7818546 (not concave)
Iteration 93: log likelihood = 1.7818546 (not concave)
Iteration 94: log likelihood = 1.7818546 (not concave)
(switching optimization to BFGS)
Iteration 95: log likelihood = 1.7818546
Iteration 96: log likelihood = 1.7818546 (backed up)
Iteration 97: log likelihood = 1.7818546 (backed up)
Iteration 98: log likelihood = 1.7818547 (backed up)
Iteration 99: log likelihood = 1.7818547 (backed up)
Iteration 100: log likelihood = 1.7818547 (backed up)
Iteration 101: log likelihood = 1.7818547 (backed up)
Iteration 102: log likelihood = 1.7818547 (backed up)
Iteration 103: log likelihood = 1.7818547 (backed up)
Iteration 104: log likelihood = 1.7818547 (backed up)
(switching optimization to BHHH)
Iteration 105: log likelihood = 1.7818547 (not concave)
Iteration 106: log likelihood = 1.7818547 (not concave)
Iteration 107: log likelihood = 1.7818547 (not concave)
Iteration 108: log likelihood = 1.7818547 (not concave)
Iteration 109: log likelihood = 1.7818547 (not concave)
(switching optimization to BFGS)
Iteration 110: log likelihood = 1.7818547

```

ARIMA regression

```

Sample: 2012w19 - 2013w36
Number of obs = 70
Wald chi2(10) = 56195.43
Log likelihood = 1.781855
Prob > chi2 = 0.0000

```

|        |        | OPG       |           |       |       |                      |
|--------|--------|-----------|-----------|-------|-------|----------------------|
| D.lnHi |        | Coef.     | Std. Err. | z     | P> z  | [95% Conf. Interval] |
| -----  |        |           |           |       |       |                      |
| lnHi   |        |           |           |       |       |                      |
|        | L7DWP  |           |           |       |       |                      |
|        | D1.    | .0323207  | .0106787  | 3.03  | 0.002 | .0113909 .0532506    |
|        | L7LST  |           |           |       |       |                      |
|        | D1.    | .0928433  | .0281087  | 3.30  | 0.001 | .0377513 .1479352    |
|        | L7NDVI |           |           |       |       |                      |
|        | D1.    | 1.094203  | .739757   | 1.48  | 0.139 | -.3556938 2.5441     |
|        | _cons  | -.011172  | .0423245  | -0.26 | 0.792 | -.0941265 .0717825   |
| -----  |        |           |           |       |       |                      |
| ARMA   |        |           |           |       |       |                      |
|        | ar     |           |           |       |       |                      |
|        | L1.    | -1.539203 | .2180173  | -7.06 | 0.000 | -1.966509 -1.111897  |
|        | L2.    | -1.708601 | .3009988  | -5.68 | 0.000 | -2.298548 -1.118655  |
|        | L3.    | -1.282053 | .2871917  | -4.46 | 0.000 | -1.844939 -.719168   |
|        | L4.    | -.2866432 | .2204006  | -1.30 | 0.193 | -.7186204 .145334    |
|        | ma     |           |           |       |       |                      |
|        | L1.    | 1.228624  | .2058173  | 5.97  | 0.000 | .825229 1.632018     |
|        | L2.    | 2.494192  | .         | .     | .     | .                    |
|        | L3.    | 2.631736  | .         | .     | .     | .                    |
|        | L4.    | 1.704252  | .1995554  | 8.54  | 0.000 | 1.313131 2.095374    |
|        | L5.    | 1.338078  | .4764923  | 2.81  | 0.005 | .4041704 2.271986    |
|        | /sigma | .1641459  | .0281133  | 5.84  | 0.000 | .1090449 .2192469    |
| -----  |        |           |           |       |       |                      |

Note: The test of the variance against zero is one sided, and the two-sided confidence interval is truncated at zero.

```

. estat ic

```

| Model | Obs | ll(null) | ll(model) | df | AIC | BIC |
|-------|-----|----------|-----------|----|-----|-----|
| ----- |     |          |           |    |     |     |

. | 70 . 1.781855 12 20.43629 47.41823

-----  
Note: N=Obs used in calculating BIC; see [R] BIC note

. estimates store M20

.

.

. arima lnHi L7DWP L7LST L7NDVI if tin(2012w19, 2013w36), arima(5,1,5)

(setting optimization to BHHH)

Iteration 0: log likelihood = -8.4349939  
Iteration 1: log likelihood = -7.2929985  
Iteration 2: log likelihood = -6.5863412  
Iteration 3: log likelihood = -5.198018  
Iteration 4: log likelihood = -4.0494248

(switching optimization to BFGS)

Iteration 5: log likelihood = -3.9987961  
Iteration 6: log likelihood = -3.7656007  
Iteration 7: log likelihood = -3.6407504  
Iteration 8: log likelihood = -2.7862247  
Iteration 9: log likelihood = -2.7182202  
Iteration 10: log likelihood = -2.3577141  
Iteration 11: log likelihood = -1.3342342  
Iteration 12: log likelihood = -1.1211243  
Iteration 13: log likelihood = -.47931093  
Iteration 14: log likelihood = -.00159409

(switching optimization to BHHH)

Iteration 15: log likelihood = .64498609  
Iteration 16: log likelihood = .66912387 (backed up)  
Iteration 17: log likelihood = .74859167 (backed up)  
Iteration 18: log likelihood = .82555073 (backed up)  
Iteration 19: log likelihood = .83916954 (backed up)

(switching optimization to BFGS)

Iteration 20: log likelihood = .88300907  
Iteration 21: log likelihood = 1.5047942  
Iteration 22: log likelihood = 1.9491435  
Iteration 23: log likelihood = 2.0303644  
Iteration 24: log likelihood = 2.1974149  
Iteration 25: log likelihood = 2.3363449  
Iteration 26: log likelihood = 2.5476129  
Iteration 27: log likelihood = 2.6654187  
Iteration 28: log likelihood = 2.7043335  
Iteration 29: log likelihood = 2.7059103

(switching optimization to BHHH)

Iteration 30: log likelihood = 2.7155059  
Iteration 31: log likelihood = 2.7160107 (backed up)  
Iteration 32: log likelihood = 2.716388 (backed up)  
Iteration 33: log likelihood = 2.7170746 (backed up)  
Iteration 34: log likelihood = 2.7174297 (backed up)

(switching optimization to BFGS)

Iteration 35: log likelihood = 2.7175773 (backed up)  
Iteration 36: log likelihood = 2.725268  
Iteration 37: log likelihood = 2.7316458  
Iteration 38: log likelihood = 2.740707  
Iteration 39: log likelihood = 2.7421546  
Iteration 40: log likelihood = 2.7440569  
Iteration 41: log likelihood = 2.7447739  
Iteration 42: log likelihood = 2.7456595  
Iteration 43: log likelihood = 2.7462631  
Iteration 44: log likelihood = 2.7462968

(switching optimization to BHHH)

Iteration 45: log likelihood = 2.7463591  
Iteration 46: log likelihood = 2.7463591 (not concave)  
Iteration 47: log likelihood = 2.7463596 (not concave)  
Iteration 48: log likelihood = 2.7463598 (not concave)  
Iteration 49: log likelihood = 2.7463599

(switching optimization to BFGS)

Iteration 50: log likelihood = 2.7463599

ARIMA regression

Sample: 2012w19 - 2013w36                      Number of obs        =        70  
 Log likelihood = 2.74636                      Wald chi2(12)        = 10386.45  
                                                  Prob > chi2            =        0.0000

```
-----+-----
```

| D.lnHi      | Coef.     | OPG<br>Std. Err. | z     | P> z  | [95% Conf. Interval] |           |
|-------------|-----------|------------------|-------|-------|----------------------|-----------|
| -----+----- |           |                  |       |       |                      |           |
| lnHi        |           |                  |       |       |                      |           |
| L7DWP       |           |                  |       |       |                      |           |
| D1.         | .0344682  | .0133391         | 2.58  | 0.010 | .0083241             | .0606124  |
| L7LST       |           |                  |       |       |                      |           |
| D1.         | .0892618  | .0277029         | 3.22  | 0.001 | .0349652             | .1435585  |
| L7NDVI      |           |                  |       |       |                      |           |
| D1.         | 1.433432  | .6205987         | 2.31  | 0.021 | .2170813             | 2.649783  |
| _cons       | -.0101395 | .0345735         | -0.29 | 0.769 | -.0779022            | .0576233  |
| -----+----- |           |                  |       |       |                      |           |
| ARMA        |           |                  |       |       |                      |           |
| ar          |           |                  |       |       |                      |           |
| L1.         | -1.702687 | .2898665         | -5.87 | 0.000 | -2.270815            | -1.134559 |
| L2.         | -2.179833 | .5184777         | -4.20 | 0.000 | -3.19603             | -1.163635 |
| L3.         | -1.876594 | .6429881         | -2.92 | 0.004 | -3.136828            | -.6163604 |
| L4.         | -.8024185 | .5060958         | -1.59 | 0.113 | -1.794348            | .1895109  |
| L5.         | -.2849221 | .2491764         | -1.14 | 0.253 | -.7732988            | .2034546  |
| ma          |           |                  |       |       |                      |           |
| L1.         | 1.418338  | .1997268         | 7.10  | 0.000 | 1.026881             | 1.809795  |
| L2.         | 2.287242  | .                | .     | .     | .                    | .         |
| L3.         | 2.264774  | .2488493         | 9.10  | 0.000 | 1.777039             | 2.75251   |
| L4.         | 1.258892  | .0705503         | 17.84 | 0.000 | 1.120616             | 1.397168  |
| L5.         | .9108266  | .2415461         | 3.77  | 0.000 | .4374049             | 1.384248  |
| /sigma      | .2141926  | .0504139         | 4.25  | 0.000 | .1153832             | .313002   |
| -----+----- |           |                  |       |       |                      |           |

Note: The test of the variance against zero is one sided, and the two-sided confidence interval is truncated at zero.

```
.
. estat ic
```

```
-----+-----
```

| Model | Obs | ll(null) | ll(model) | df | AIC      | BIC      |
|-------|-----|----------|-----------|----|----------|----------|
| .     | 70  | .        | 2.74636   | 14 | 22.50728 | 53.98621 |

```
-----+-----
```

Note: N=Obs used in calculating BIC; see [R] BIC note

```
.
. estimates store M201
.
.
.
.
. arima lnHi L7DWP L7LST L7NDVI if tin(2012w19, 2013w36), arima(6,1,5)
```

```
(setting optimization to BHHH)
Iteration 0: log likelihood = -8.4983424
Iteration 1: log likelihood = -7.7806043
Iteration 2: log likelihood = -2.5295176
Iteration 3: log likelihood = -.82861412
Iteration 4: log likelihood = .21502057
(switiching optimization to BFGS)
Iteration 5: log likelihood = .49062186
Iteration 6: log likelihood = 1.0122859
Iteration 7: log likelihood = 1.2426824 (backed up)
```

```

Iteration 8: log likelihood = 2.1311737
Iteration 9: log likelihood = 2.911629
Iteration 10: log likelihood = 3.2472176
Iteration 11: log likelihood = 3.3452208
Iteration 12: log likelihood = 3.7472824
Iteration 13: log likelihood = 3.8876548
Iteration 14: log likelihood = 3.9140271
(switching optimization to BHHH)
Iteration 15: log likelihood = 4.3092151
Iteration 16: log likelihood = 4.3099856 (backed up)
Iteration 17: log likelihood = 4.3104457 (backed up)
Iteration 18: log likelihood = 4.3108437 (backed up)
Iteration 19: log likelihood = 4.3109242 (backed up)
(switching optimization to BFGS)
Iteration 20: log likelihood = 4.3111349 (backed up)
Iteration 21: log likelihood = 4.3198467 (backed up)
Iteration 22: log likelihood = 4.5266731
Iteration 23: log likelihood = 4.5973076
Iteration 24: log likelihood = 5.0379514
Iteration 25: log likelihood = 5.1199352
Iteration 26: log likelihood = 5.6985621
Iteration 27: log likelihood = 5.8394127
Iteration 28: log likelihood = 6.1943807
Iteration 29: log likelihood = 6.3038509
(switching optimization to BHHH)
Iteration 30: log likelihood = 6.4285891
Iteration 31: log likelihood = 6.445726 (backed up)
Iteration 32: log likelihood = 6.4518256 (backed up)
Iteration 33: log likelihood = 6.4569345 (backed up)
Iteration 34: log likelihood = 6.4579724 (backed up)
(switching optimization to BFGS)
Iteration 35: log likelihood = 6.4583558 (backed up)
Iteration 36: log likelihood = 6.4589535 (backed up)
Iteration 37: log likelihood = 6.4625017
Iteration 38: log likelihood = 6.5610228
Iteration 39: log likelihood = 6.5766496
Iteration 40: log likelihood = 6.6788158
Iteration 41: log likelihood = 6.682801
Iteration 42: log likelihood = 6.698556
Iteration 43: log likelihood = 6.7091954
Iteration 44: log likelihood = 6.7121414
(switching optimization to BHHH)
Iteration 45: log likelihood = 6.712269
Iteration 46: log likelihood = 6.7122691 (backed up)
Iteration 47: log likelihood = 6.7122692 (not concave)
Iteration 48: log likelihood = 6.7122738 (not concave)
Iteration 49: log likelihood = 6.7122778 (not concave)
(switching optimization to BFGS)
Iteration 50: log likelihood = 6.7122798
Iteration 51: log likelihood = 6.7122826 (backed up)
Iteration 52: log likelihood = 6.7122843 (backed up)
Iteration 53: log likelihood = 6.7122845 (backed up)
Iteration 54: log likelihood = 6.7122849 (backed up)
Iteration 55: log likelihood = 6.7122852 (backed up)
Iteration 56: log likelihood = 6.7122853 (backed up)
Iteration 57: log likelihood = 6.7122853 (backed up)
Iteration 58: log likelihood = 6.7122853 (backed up)
Iteration 59: log likelihood = 6.7122853 (backed up)
(switching optimization to BHHH)
Iteration 60: log likelihood = 6.7122854 (not concave)
Iteration 61: log likelihood = 6.7122861 (not concave)
Iteration 62: log likelihood = 6.7122875 (not concave)
Iteration 63: log likelihood = 6.7122883 (not concave)
Iteration 64: log likelihood = 6.7122885 (not concave)
(switching optimization to BFGS)
Iteration 65: log likelihood = 6.7122886
Iteration 66: log likelihood = 6.7122886

```

ARIMA regression

Sample: 2012w19 - 2013w36

Number of obs = 70



Sample: 2012w19 - 2013w36  
 Log likelihood = -10.88849

Number of obs = 70  
 Wald chi2(4) = 32.56  
 Prob > chi2 = 0.0000

| D.lnHi |        | Coef.     | OPG<br>Std. Err. | z     | P> z  | [95% Conf. Interval] |          |
|--------|--------|-----------|------------------|-------|-------|----------------------|----------|
| -----  |        |           |                  |       |       |                      |          |
| lnHi   |        |           |                  |       |       |                      |          |
| L7DWP  | Dl.    | .0352464  | .0167862         | 2.10  | 0.036 | .002346              | .0681468 |
| L7LST  | Dl.    | .103655   | .0251477         | 4.12  | 0.000 | .0543665             | .1529435 |
|        | _cons  | -.0208092 | .0257976         | -0.81 | 0.420 | -.0713715            | .0297531 |
| -----  |        |           |                  |       |       |                      |          |
| ARMA   |        |           |                  |       |       |                      |          |
|        | ar     |           |                  |       |       |                      |          |
| L1.    | L1.    | -.4149715 | .333382          | -1.24 | 0.213 | -1.068388            | .2384452 |
|        | ma     |           |                  |       |       |                      |          |
| L1.    | L1.    | .0601303  | .3979042         | 0.15  | 0.880 | -.7197476            | .8400082 |
| -----  |        |           |                  |       |       |                      |          |
|        | /sigma | .2824101  | .0290265         | 9.73  | 0.000 | .2255192             | .3393011 |
| -----  |        |           |                  |       |       |                      |          |

Note: The test of the variance against zero is one sided, and the two-sided confidence interval is truncated at zero.

. estat ic

| Model | Obs | ll(null) | ll(model) | df | AIC      | BIC      |
|-------|-----|----------|-----------|----|----------|----------|
| .     | 70  | .        | -10.88849 | 6  | 33.77699 | 47.26796 |

Note: N=Obs used in calculating BIC; see [R] BIC note

. estimates store M21

. arima lnHi L7DWP L7LST if tin(2012w19, 2013w36), arima(2,1,1)

(setting optimization to BHHH)  
 Iteration 0: log likelihood = -11.890506  
 Iteration 1: log likelihood = -11.352826  
 Iteration 2: log likelihood = -11.184893  
 Iteration 3: log likelihood = -11.060925  
 Iteration 4: log likelihood = -10.93418  
 (switching optimization to BFGS)  
 Iteration 5: log likelihood = -10.909406  
 Iteration 6: log likelihood = -10.861383  
 Iteration 7: log likelihood = -10.816139  
 Iteration 8: log likelihood = -10.734573  
 Iteration 9: log likelihood = -10.734573 (backed up)  
 Iteration 10: log likelihood = -10.734573 (backed up)  
 Iteration 11: log likelihood = -10.734573 (backed up)  
 BFGS stepping has contracted, resetting BFGS Hessian (0)  
 Iteration 12: log likelihood = -10.734573 (backed up)  
 Iteration 13: log likelihood = -10.576069 (backed up)  
 Iteration 14: log likelihood = -10.512666 (backed up)  
 (switching optimization to BHHH)  
 Iteration 15: log likelihood = -10.039145 (backed up)  
 Iteration 16: log likelihood = -9.9471668  
 Iteration 17: log likelihood = -9.8420982  
 Iteration 18: log likelihood = -9.840031 (backed up)

```

Iteration 19: log likelihood = -9.8394741 (backed up)
(switcing optimization to BFGS)
Iteration 20: log likelihood = -9.8393958 (backed up)
Iteration 21: log likelihood = -9.7869523
Iteration 22: log likelihood = -9.7829896
Iteration 23: log likelihood = -9.7791964
Iteration 24: log likelihood = -9.7790818
Iteration 25: log likelihood = -9.7790392
Iteration 26: log likelihood = -9.7790383

```

ARIMA regression

```

Sample: 2012w19 - 2013w36      Number of obs   =      70
                                Wald chi2(5)         =    456.28
Log likelihood = -9.779038     Prob > chi2      =    0.0000

```

|       |        | Coef.     | OPG<br>Std. Err. | z      | P> z  | [95% Conf. Interval] |           |
|-------|--------|-----------|------------------|--------|-------|----------------------|-----------|
| ----- |        |           |                  |        |       |                      |           |
| lnHi  |        |           |                  |        |       |                      |           |
|       | L7DWP  |           |                  |        |       |                      |           |
|       | D1.    | .032302   | .0155313         | 2.08   | 0.038 | .0018612             | .0627428  |
|       | L7LST  |           |                  |        |       |                      |           |
|       | D1.    | .1079328  | .0254211         | 4.25   | 0.000 | .0581085             | .1577572  |
|       | _cons  | -.0209254 | .0259211         | -0.81  | 0.420 | -.07173              | .0298791  |
| ----- |        |           |                  |        |       |                      |           |
| ARMA  |        |           |                  |        |       |                      |           |
|       | ar     |           |                  |        |       |                      |           |
|       | L1.    | -1.325108 | .1291718         | -10.26 | 0.000 | -1.57828             | -1.071936 |
|       | L2.    | -.4029192 | .1392834         | -2.89  | 0.004 | -.6759097            | -.1299288 |
|       | ma     |           |                  |        |       |                      |           |
|       | L1.    | .9999958  | 604.2722         | 0.00   | 0.999 | -1183.352            | 1185.352  |
|       | /sigma | .2744847  | 82.91785         | 0.00   | 0.499 | 0                    | 162.7905  |
| ----- |        |           |                  |        |       |                      |           |

Note: The test of the variance against zero is one sided, and the two-sided confidence interval is truncated at zero.

```

.
. estat ic

```

| Model | Obs | ll(null) | ll(model) | df | AIC      | BIC      |
|-------|-----|----------|-----------|----|----------|----------|
| .     | 70  | .        | -9.779038 | 7  | 33.55808 | 49.29754 |

Note: N=Obs used in calculating BIC; see [R] BIC note

```

. estimates store M22

```

```

. arima lnHi L7DWP L7LST if tin(2012w19, 2013w36), arima(1,1,2)

```

```

(setting optimization to BHHH)
Iteration 0: log likelihood = -11.023342
Iteration 1: log likelihood = -9.6723745
Iteration 2: log likelihood = -8.9384683
Iteration 3: log likelihood = -8.8937635
Iteration 4: log likelihood = -8.7498709
(switcing optimization to BFGS)
Iteration 5: log likelihood = -8.721359
Iteration 6: log likelihood = -8.66917
Iteration 7: log likelihood = -8.6659805
Iteration 8: log likelihood = -8.664499

```



```
Iteration 9: log likelihood = -8.6643219
Iteration 10: log likelihood = -8.6642787
Iteration 11: log likelihood = -8.6642777
Iteration 12: log likelihood = -8.6642776
```

ARIMA regression

```
Sample: 2012w19 - 2013w36           Number of obs   =           70
Log likelihood = -8.664278           Wald chi2(5)    =           38.84
                                   Prob > chi2       =           0.0000
```

| D.lnHi |        | Coef.     | OPG<br>Std. Err. | z     | P> z  | [95% Conf. Interval] |          |
|--------|--------|-----------|------------------|-------|-------|----------------------|----------|
| lnHi   | L7DWP  |           |                  |       |       |                      |          |
|        | D1.    | .035216   | .013976          | 2.52  | 0.012 | .0078236             | .0626083 |
|        | L7LST  |           |                  |       |       |                      |          |
|        | D1.    | .1157995  | .0275287         | 4.21  | 0.000 | .0618443             | .1697548 |
|        | _cons  | -.0191386 | .0375829         | -0.51 | 0.611 | -.0927997            | .0545225 |
| ARMA   | ar     |           |                  |       |       |                      |          |
|        | L1.    | .1307163  | .4053583         | 0.32  | 0.747 | -.6637714            | .9252039 |
|        | ma     |           |                  |       |       |                      |          |
|        | L1.    | -.5145005 | .3633739         | -1.42 | 0.157 | -1.2267              | .1976993 |
|        | L2.    | .4233441  | .1378593         | 3.07  | 0.002 | .1531448             | .6935435 |
|        | /sigma | .2730167  | .0292358         | 9.34  | 0.000 | .2157155             | .3303179 |

Note: The test of the variance against zero is one sided, and the two-sided confidence interval is truncated at zero.

```
. estat ic
```

| Model | Obs | ll(null) | ll(model) | df | AIC      | BIC      |
|-------|-----|----------|-----------|----|----------|----------|
| .     | 70  | .        | -8.664278 | 7  | 31.32856 | 47.06802 |

Note: N=Obs used in calculating BIC; see [R] BIC note

```
. estimates store M23
```

```
. arima lnHi L7DWP L7LST if tin(2012w19, 2013w36), arima(3,1,1)
```

```
(setting optimization to BHHH)
Iteration 0: log likelihood = -11.133686
Iteration 1: log likelihood = -9.7025731
Iteration 2: log likelihood = -9.446757
Iteration 3: log likelihood = -9.4138499
Iteration 4: log likelihood = -9.3811795
(swimming optimization to BFGS)
Iteration 5: log likelihood = -9.361189
Iteration 6: log likelihood = -9.334346
Iteration 7: log likelihood = -9.3320159
Iteration 8: log likelihood = -9.3313732
Iteration 9: log likelihood = -9.331326
Iteration 10: log likelihood = -9.3313083
Iteration 11: log likelihood = -9.331308
```

ARIMA regression

Sample: 2012w19 - 2013w36  
 Log likelihood = -9.331308

Number of obs = 70  
 Wald chi2(6) = 33.35  
 Prob > chi2 = 0.0000

| D.lnHi |  | Coef.     | OPG<br>Std. Err. | z     | P> z  | [95% Conf. Interval] |          |
|--------|--|-----------|------------------|-------|-------|----------------------|----------|
| -----  |  |           |                  |       |       |                      |          |
| lnHi   |  |           |                  |       |       |                      |          |
| L7DWP  |  |           |                  |       |       |                      |          |
| D1.    |  | .0355708  | .0159435         | 2.23  | 0.026 | .0043221             | .0668195 |
| L7LST  |  |           |                  |       |       |                      |          |
| D1.    |  | .1127562  | .0273669         | 4.12  | 0.000 | .0591182             | .1663943 |
| _cons  |  |           |                  |       |       |                      |          |
|        |  | -.0202084 | .0349757         | -0.58 | 0.563 | -.0887595            | .0483428 |
| -----  |  |           |                  |       |       |                      |          |
| ARMA   |  |           |                  |       |       |                      |          |
| ar     |  |           |                  |       |       |                      |          |
| L1.    |  | -.2918563 | .6880835         | -0.42 | 0.671 | -1.640475            | 1.056763 |
| L2.    |  | .1418157  | .2683304         | 0.53  | 0.597 | -.3841023            | .6677337 |
| L3.    |  | .2090785  | .1254461         | 1.67  | 0.096 | -.0367913            | .4549483 |
| ma     |  |           |                  |       |       |                      |          |
| L1.    |  | -.0671967 | .6740259         | -0.10 | 0.921 | -1.388263            | 1.25387  |
| /sigma |  |           |                  |       |       |                      |          |
|        |  | .2759132  | .0296768         | 9.30  | 0.000 | .2177479             | .3340786 |
| -----  |  |           |                  |       |       |                      |          |

Note: The test of the variance against zero is one sided, and the two-sided confidence interval is truncated at zero.

.  
 . estat ic

| Model | Obs | ll(null) | ll(model) | df | AIC      | BIC      |
|-------|-----|----------|-----------|----|----------|----------|
| .     | 70  | .        | -9.331308 | 8  | 34.66262 | 52.65058 |

Note: N=Obs used in calculating BIC; see [R] BIC note

.  
 . estimates store M24

.  
 . arima lnHi L7DWP L7LST if tin(2012w19, 2013w36), arima(1,1,3)

(setting optimization to BHHH)  
 Iteration 0: log likelihood = -11.377772  
 Iteration 1: log likelihood = -9.3550268  
 Iteration 2: log likelihood = -8.4490478  
 Iteration 3: log likelihood = -8.1654966  
 Iteration 4: log likelihood = -8.0258455  
 (switching optimization to BFGS)  
 Iteration 5: log likelihood = -7.9593984  
 Iteration 6: log likelihood = -7.3715558  
 Iteration 7: log likelihood = -7.2792805  
 Iteration 8: log likelihood = -7.2583827  
 Iteration 9: log likelihood = -7.2447188  
 Iteration 10: log likelihood = -7.2442876  
 Iteration 11: log likelihood = -7.2442269  
 Iteration 12: log likelihood = -7.2442202  
 Iteration 13: log likelihood = -7.2442199

ARIMA regression

Sample: 2012w19 - 2013w36

Number of obs = 70  
 Wald chi2(6) = 135.79

Log likelihood = -7.24422 Prob > chi2 = 0.0000

```
-----+-----
```

|             |        | OPG       |           |       |       |                      |           |  |
|-------------|--------|-----------|-----------|-------|-------|----------------------|-----------|--|
| D.lnHi      |        | Coef.     | Std. Err. | z     | P> z  | [95% Conf. Interval] |           |  |
| -----+----- |        |           |           |       |       |                      |           |  |
| lnHi        |        |           |           |       |       |                      |           |  |
|             | L7DWP  |           |           |       |       |                      |           |  |
|             | D1.    | .0329685  | .013817   | 2.39  | 0.017 | .0058876             | .0600493  |  |
|             | L7LST  |           |           |       |       |                      |           |  |
|             | D1.    | .1189216  | .0272758  | 4.36  | 0.000 | .065462              | .1723813  |  |
|             | _cons  | -.0187553 | .0387049  | -0.48 | 0.628 | -.0946154            | .0571049  |  |
| -----+----- |        |           |           |       |       |                      |           |  |
| ARMA        |        |           |           |       |       |                      |           |  |
|             | ar     |           |           |       |       |                      |           |  |
|             | L1.    | -.8495896 | .1299484  | -6.54 | 0.000 | -1.104284            | -.5948953 |  |
|             | ma     |           |           |       |       |                      |           |  |
|             | L1.    | .5385544  | 281.0097  | 0.00  | 0.998 | -550.2303            | 551.3074  |  |
|             | L2.    | .0009602  | 129.711   | 0.00  | 1.000 | -254.2279            | 254.2299  |  |
|             | L3.    | .4624248  | 129.9882  | 0.00  | 0.997 | -254.3097            | 255.2345  |  |
| -----+----- |        |           |           |       |       |                      |           |  |
|             | /sigma | .2640037  | 37.11367  | 0.01  | 0.497 | 0                    | 73.00545  |  |
| -----+----- |        |           |           |       |       |                      |           |  |

Note: The test of the variance against zero is one sided, and the two-sided confidence interval is truncated at zero.

```
. estat ic
```

```
-----+-----
```

| Model | Obs | ll(null) | ll(model) | df | AIC      | BIC     |
|-------|-----|----------|-----------|----|----------|---------|
| .     | 70  | .        | -7.24422  | 8  | 30.48844 | 48.4764 |

```
-----+-----
```

Note: N=Obs used in calculating BIC; see [R] BIC note

```
. estimates store M25
```

```
. arima lnHi L7DWP L7LST if tin(2012w19, 2013w36), arima(3,1,2)
```

```
(setting optimization to BHHH)
Iteration 0: log likelihood = -10.874276
Iteration 1: log likelihood = -9.2671279
Iteration 2: log likelihood = -6.4539875
Iteration 3: log likelihood = -5.5789403
Iteration 4: log likelihood = -4.130617
(switiching optimization to BFGS)
Iteration 5: log likelihood = -4.1259038
Iteration 6: log likelihood = -3.8741071
Iteration 7: log likelihood = -3.6244149
Iteration 8: log likelihood = -3.593672
Iteration 9: log likelihood = -3.5914595
Iteration 10: log likelihood = -3.5876556
Iteration 11: log likelihood = -3.5874999
Iteration 12: log likelihood = -3.5874855
Iteration 13: log likelihood = -3.5874842
Iteration 14: log likelihood = -3.5874842
```

ARIMA regression

```
Sample: 2012w19 - 2013w36
Log likelihood = -3.587484
Number of obs = 70
Wald chi2(6) = 166.70
Prob > chi2 = 0.0000
```

| D.lnHi |        | Coef.     | OPG<br>Std. Err. | z     | P> z  | [95% Conf. Interval] |           |
|--------|--------|-----------|------------------|-------|-------|----------------------|-----------|
| lnHi   | L7DWP  |           |                  |       |       |                      |           |
|        | D1.    | .0319624  | .0085803         | 3.73  | 0.000 | .0151452             | .0487795  |
|        | L7LST  |           |                  |       |       |                      |           |
|        | D1.    | .0955552  | .0214199         | 4.46  | 0.000 | .0535729             | .1375375  |
|        | _cons  | -.0204758 | .0332836         | -0.62 | 0.538 | -.0857104            | .0447588  |
| -----  |        |           |                  |       |       |                      |           |
| ARMA   |        |           |                  |       |       |                      |           |
|        | ar     |           |                  |       |       |                      |           |
|        | L1.    | -.0752773 | .1447457         | -0.52 | 0.603 | -.3589737            | .208419   |
|        | L2.    | -.5590046 | .132473          | -4.22 | 0.000 | -.8186469            | -.2993623 |
|        | L3.    | -.039912  | .1321117         | -0.30 | 0.763 | -.2988463            | .2190222  |
|        | ma     |           |                  |       |       |                      |           |
|        | L1.    | -.3264749 | .0830424         | -3.93 | 0.000 | -.4892351            | -.1637147 |
|        | L2.    | 1         | .                | .     | .     | .                    | .         |
|        | /sigma | .2451178  | .0258135         | 9.50  | 0.000 | .1945243             | .2957114  |

Note: The test of the variance against zero is one sided, and the two-sided confidence interval is truncated at zero.

.  
. estat ic

| Model | Obs | ll(null) | ll(model) | df | AIC      | BIC      |
|-------|-----|----------|-----------|----|----------|----------|
| .     | 70  | .        | -3.587484 | 8  | 23.17497 | 41.16293 |

Note: N=Obs used in calculating BIC; see [R] BIC note

.  
. estimates store M26  
.  
.  
. arima lnHi L7DWP L7LST if tin(2012w19, 2013w36), arima(2,1,3)

(setting optimization to BHHH)  
Iteration 0: log likelihood = -9.6982613  
Iteration 1: log likelihood = -8.8527218  
Iteration 2: log likelihood = -7.6749049  
Iteration 3: log likelihood = -7.5666556  
Iteration 4: log likelihood = -7.4944714  
(switching optimization to BFGS)  
Iteration 5: log likelihood = -7.0459002  
Iteration 6: log likelihood = -6.04304  
Iteration 7: log likelihood = -5.1162593  
Iteration 8: log likelihood = -4.4713257  
Iteration 9: log likelihood = -4.1301045  
Iteration 10: log likelihood = -4.0523666  
Iteration 11: log likelihood = -3.900442  
Iteration 12: log likelihood = -3.6377185  
Iteration 13: log likelihood = -3.6227877  
Iteration 14: log likelihood = -3.6009898  
(switching optimization to BHHH)  
Iteration 15: log likelihood = -3.5978399  
Iteration 16: log likelihood = -3.5978189 (backed up)  
Iteration 17: log likelihood = -3.597807 (backed up)  
Iteration 18: log likelihood = -3.597807 (backed up)  
Iteration 19: log likelihood = -3.5978069 (backed up)  
(switching optimization to BFGS)  
Iteration 20: log likelihood = -3.5978069 (backed up)

```

Iteration 21: log likelihood = -3.5973292
Iteration 22: log likelihood = -3.5968487
Iteration 23: log likelihood = -3.5967364
Iteration 24: log likelihood = -3.5966789
Iteration 25: log likelihood = -3.5966704
Iteration 26: log likelihood = -3.5966661
Iteration 27: log likelihood = -3.5966661

```

ARIMA regression

```

Sample: 2012w19 - 2013w36      Number of obs   =      70
                               Wald chi2(6)         =     168.12
Log likelihood = -3.596666     Prob > chi2      =     0.0000

```

| D.lnHi |        | OPG       |          | z     | P> z  | [95% Conf. Interval] |           |
|--------|--------|-----------|----------|-------|-------|----------------------|-----------|
|        | Coef.  | Std. Err. |          |       |       |                      |           |
| -----  |        |           |          |       |       |                      |           |
| lnHi   |        |           |          |       |       |                      |           |
|        | L7DWP  |           |          |       |       |                      |           |
|        | D1.    | .0319703  | .0085403 | 3.74  | 0.000 | .0152317             | .048709   |
|        | L7LST  |           |          |       |       |                      |           |
|        | D1.    | .0954343  | .0213476 | 4.47  | 0.000 | .0535939             | .1372748  |
|        | _cons  | -.0204479 | .0334906 | -0.61 | 0.541 | -.0860882            | .0451924  |
| -----  |        |           |          |       |       |                      |           |
| ARMA   |        |           |          |       |       |                      |           |
|        | ar     |           |          |       |       |                      |           |
|        | L1.    | -.0118645 | .2195761 | -0.05 | 0.957 | -.4422257            | .4184967  |
|        | L2.    | -.5551411 | .1308421 | -4.24 | 0.000 | -.811587             | -.2986952 |
|        | ma     |           |          |       |       |                      |           |
|        | L1.    | -.3863592 | .2464936 | -1.57 | 0.117 | -.8694777            | .0967593  |
|        | L2.    | 1.01953   | .        | .     | .     | .                    | .         |
|        | L3.    | -.0598069 | .2399576 | -0.25 | 0.803 | -.5301152            | .4105013  |
| -----  |        |           |          |       |       |                      |           |
|        | /sigma | .2451048  | .0265187 | 9.24  | 0.000 | .193129              | .2970805  |
| -----  |        |           |          |       |       |                      |           |

Note: The test of the variance against zero is one sided, and the two-sided confidence interval is truncated at zero.

```

. estat ic

```

| Model | Obs | ll(null) | ll(model) | df | AIC      | BIC      |
|-------|-----|----------|-----------|----|----------|----------|
| .     | 70  | .        | -3.596666 | 8  | 23.19333 | 41.18129 |

Note: N=Obs used in calculating BIC; see [R] BIC note

```

. estimates store M27

```

```

. arima lnHi L7DWP L7LST if tin(2012w19, 2013w36), arima(3,1,3)

```

```

(setting optimization to BHHH)
Iteration 0: log likelihood = -9.5910039
Iteration 1: log likelihood = -6.5356204
Iteration 2: log likelihood = -6.1924862
Iteration 3: log likelihood = -6.0367742
Iteration 4: log likelihood = -4.4508987
(switching optimization to BFGS)
Iteration 5: log likelihood = -4.2313348
Iteration 6: log likelihood = -4.1323593 (backed up)
Iteration 7: log likelihood = -3.5765298
Iteration 8: log likelihood = -3.5108529

```

```

Iteration 9: log likelihood = -3.4569551
Iteration 10: log likelihood = -3.4133925
Iteration 11: log likelihood = -3.380646
Iteration 12: log likelihood = -3.3463118
Iteration 13: log likelihood = -3.2053805
Iteration 14: log likelihood = -3.1683602
(switching optimization to BHHH)
Iteration 15: log likelihood = -3.139898
Iteration 16: log likelihood = -3.1390726 (backed up)
Iteration 17: log likelihood = -3.1387659 (backed up)
Iteration 18: log likelihood = -3.1386872 (backed up)
Iteration 19: log likelihood = -3.1381542 (backed up)
(switching optimization to BFGS)
Iteration 20: log likelihood = -3.1381207 (backed up)
Iteration 21: log likelihood = -3.1380868 (backed up)
Iteration 22: log likelihood = -3.1372519
Iteration 23: log likelihood = -3.1357575
Iteration 24: log likelihood = -3.1356917
Iteration 25: log likelihood = -3.1356505
Iteration 26: log likelihood = -3.1356478
Iteration 27: log likelihood = -3.1356474

```

ARIMA regression

```

Sample: 2012w19 - 2013w36      Number of obs   =      70
                               Wald chi2(6)          =     132.51
Log likelihood = -3.135647     Prob > chi2     =      0.0000

```

|       |        | Coef.     | OPG<br>Std. Err. | z     | P> z  | [95% Conf. Interval] |           |
|-------|--------|-----------|------------------|-------|-------|----------------------|-----------|
| ----- |        |           |                  |       |       |                      |           |
| lnHi  |        |           |                  |       |       |                      |           |
|       | L7DWP  |           |                  |       |       |                      |           |
|       | D1.    | .0302273  | .0078069         | 3.87  | 0.000 | .014926              | .0455286  |
|       | L7LST  |           |                  |       |       |                      |           |
|       | D1.    | .0977306  | .0210483         | 4.64  | 0.000 | .0564766             | .1389845  |
|       | _cons  | -.0202096 | .0350825         | -0.58 | 0.565 | -.08897              | .0485508  |
| ----- |        |           |                  |       |       |                      |           |
| ARMA  |        |           |                  |       |       |                      |           |
|       | ar     |           |                  |       |       |                      |           |
|       | L1.    | -.9913755 | .1365483         | -7.26 | 0.000 | -1.259005            | -.7237458 |
|       | L2.    | -.5938832 | .2044511         | -2.90 | 0.004 | -.9946001            | -.1931664 |
|       | L3.    | -.4937172 | .1492344         | -3.31 | 0.001 | -.7862113            | -.2012231 |
|       | ma     |           |                  |       |       |                      |           |
|       | L1.    | .6708793  | .1667768         | 4.02  | 0.000 | .3440027             | .9977559  |
|       | L2.    | .6708795  | .                | .     | .     | .                    | .         |
|       | L3.    | .9999995  | .                | .     | .     | .                    | .         |
|       | /sigma | .2409237  | .0248145         | 9.71  | 0.000 | .1922883             | .2895592  |
| ----- |        |           |                  |       |       |                      |           |

Note: The test of the variance against zero is one sided, and the two-sided confidence interval is truncated at zero.

```

. estat ic

```

| Model | Obs | ll(null) | ll(model) | df | AIC      | BIC      |
|-------|-----|----------|-----------|----|----------|----------|
| .     | 70  | .        | -3.135647 | 8  | 22.27129 | 40.25926 |

Note: N=Obs used in calculating BIC; see [R] BIC note

```

. estimates store M28

```

```
.
.
. arima lnHi L7DWP L7LST if tin(2012w19, 2013w36), arima(4,1,3)
```

```
(setting optimization to BHHH)
Iteration 0: log likelihood = -10.063851
Iteration 1: log likelihood = -7.5392755
Iteration 2: log likelihood = -6.5304014
Iteration 3: log likelihood = -5.293059
Iteration 4: log likelihood = -4.9550352
(switching optimization to BFGS)
Iteration 5: log likelihood = -4.5557
Iteration 6: log likelihood = -4.1447811 (backed up)
Iteration 7: log likelihood = -3.7014782
Iteration 8: log likelihood = -3.4484612
Iteration 9: log likelihood = -3.3445364
Iteration 10: log likelihood = -3.2669762
Iteration 11: log likelihood = -2.9438286
Iteration 12: log likelihood = -2.8883896
Iteration 13: log likelihood = -2.8809083
Iteration 14: log likelihood = -2.8790081
(switching optimization to BHHH)
Iteration 15: log likelihood = -2.8787865
Iteration 16: log likelihood = -2.8787855 (backed up)
Iteration 17: log likelihood = -2.8787854 (backed up)
Iteration 18: log likelihood = -2.8787853 (backed up)
Iteration 19: log likelihood = -2.8787853 (backed up)
(switching optimization to BFGS)
Iteration 20: log likelihood = -2.8787853 (backed up)
Iteration 21: log likelihood = -2.8787839 (backed up)
Iteration 22: log likelihood = -2.8787754
Iteration 23: log likelihood = -2.8787738
Iteration 24: log likelihood = -2.8787734
```

ARIMA regression

```
Sample: 2012w19 - 2013w36          Number of obs   =          70
                                Wald chi2(8)         =         190.70
Log likelihood = -2.878773          Prob > chi2     =          0.0000
```

|       |        | Coef.     | OPG<br>Std. Err. | z     | P> z  | [95% Conf. Interval] |           |
|-------|--------|-----------|------------------|-------|-------|----------------------|-----------|
| ----- |        |           |                  |       |       |                      |           |
| lnHi  |        |           |                  |       |       |                      |           |
|       | L7DWP  |           |                  |       |       |                      |           |
|       | D1.    | .0299824  | .0084759         | 3.54  | 0.000 | .0133699             | .0465949  |
|       | L7LST  |           |                  |       |       |                      |           |
|       | D1.    | .1000267  | .022119          | 4.52  | 0.000 | .0566743             | .143379   |
|       | _cons  | -.0205276 | .0329182         | -0.62 | 0.533 | -.0850461            | .0439908  |
| ----- |        |           |                  |       |       |                      |           |
| ARMA  |        |           |                  |       |       |                      |           |
|       | ar     |           |                  |       |       |                      |           |
|       | L1.    | -1.021841 | .1617596         | -6.32 | 0.000 | -1.338884            | -.7047977 |
|       | L2.    | -.6406856 | .220212          | -2.91 | 0.004 | -1.072293            | -.209078  |
|       | L3.    | -.5767076 | .1904488         | -3.03 | 0.002 | -.9499804            | -.2034348 |
|       | L4.    | -.0899142 | .1439119         | -0.62 | 0.532 | -.3719763            | .1921479  |
|       | ma     |           |                  |       |       |                      |           |
|       | L1.    | .66627    | 1475.2           | 0.00  | 1.000 | -2890.673            | 2892.005  |
|       | L2.    | .6662668  | 1475.198         | 0.00  | 1.000 | -2890.669            | 2892.002  |
|       | L3.    | 1.000001  | .                | .     | .     | .                    | .         |
| ----- |        |           |                  |       |       |                      |           |
|       | /sigma | .2402228  | .0295312         | 8.13  | 0.000 | .1823427             | .2981029  |
| ----- |        |           |                  |       |       |                      |           |

Note: The test of the variance against zero is one sided, and the two-sided confidence interval is truncated at zero.

. estat ic

| Model | Obs | ll(null) | ll(model) | df | AIC      | BIC     |
|-------|-----|----------|-----------|----|----------|---------|
| .     | 70  | .        | -2.878773 | 10 | 25.75755 | 48.2425 |

Note: N=Obs used in calculating BIC; see [R] BIC note

. estimates store M29

.  
.

. arima lnHi L7DWP L7LST if tin(2012w19, 2013w36), arima(3,1,4)

(setting optimization to BHHH)

Iteration 0: log likelihood = -9.5936478  
Iteration 1: log likelihood = -5.7435419  
Iteration 2: log likelihood = -4.3580479  
Iteration 3: log likelihood = -4.3439393 (backed up)  
Iteration 4: log likelihood = -4.2668676  
(switching optimization to BFGS)  
Iteration 5: log likelihood = -4.2450889  
Iteration 6: log likelihood = -3.8976553  
Iteration 7: log likelihood = -3.2645449  
Iteration 8: log likelihood = -3.1524962  
Iteration 9: log likelihood = -2.972875  
Iteration 10: log likelihood = -2.9682942  
Iteration 11: log likelihood = -2.954677  
Iteration 12: log likelihood = -2.9542148  
Iteration 13: log likelihood = -2.9540801  
Iteration 14: log likelihood = -2.9540588  
(switching optimization to BHHH)  
Iteration 15: log likelihood = -2.9540568  
Iteration 16: log likelihood = -2.9540568 (backed up)  
Iteration 17: log likelihood = -2.9540568 (backed up)  
Iteration 18: log likelihood = -2.9540568 (not concave)  
Iteration 19: log likelihood = -2.9540568 (not concave)  
(switching optimization to BFGS)  
Iteration 20: log likelihood = -2.9540568  
Iteration 21: log likelihood = -2.9540568 (backed up)  
Iteration 22: log likelihood = -2.9540568 (backed up)  
Iteration 23: log likelihood = -2.9540568 (backed up)  
Iteration 24: log likelihood = -2.9540568 (backed up)  
Iteration 25: log likelihood = -2.9540568 (backed up)  
Iteration 26: log likelihood = -2.9540568 (backed up)  
Iteration 27: log likelihood = -2.9540568 (backed up)  
Iteration 28: log likelihood = -2.9540568 (backed up)  
Iteration 29: log likelihood = -2.9540568

ARIMA regression

Sample: 2012w19 - 2013w36                      Number of obs        =        70  
                                                 Wald chi2(8)         =        163.28  
Log likelihood = -2.954057                      Prob > chi2         =        0.0000

| D.lnHi | Coef.     | OPG       |  | z     | P> z  | [95% Conf. Interval] |          |
|--------|-----------|-----------|--|-------|-------|----------------------|----------|
|        |           | Std. Err. |  |       |       |                      |          |
| lnHi   |           |           |  |       |       |                      |          |
| L7DWP  |           |           |  |       |       |                      |          |
| D1.    | .0300535  | .0084335  |  | 3.56  | 0.000 | .0135241             | .0465829 |
| L7LST  |           |           |  |       |       |                      |          |
| D1.    | .0994312  | .021805   |  | 4.56  | 0.000 | .0566942             | .1421683 |
| _cons  | -.0204396 | .0334837  |  | -0.61 | 0.542 | -.0860665            | .0451872 |



```
ARMA
```

| ar     |  |           |          |          |       |           |           |          |
|--------|--|-----------|----------|----------|-------|-----------|-----------|----------|
| L1.    |  | -.8819622 | .3181541 | -2.77    | 0.006 | -1.505533 | -.2583916 |          |
| L2.    |  | -.4981217 | .3207628 | -1.55    | 0.120 | -1.126805 | .1305619  |          |
| L3.    |  | -.4766546 | .1697211 | -2.81    | 0.005 | -.8093017 | -.1440075 |          |
| ma     |  |           |          |          |       |           |           |          |
| L1.    |  | .5354841  | 3016.254 | 0.00     | 1.000 | -5911.213 | 5912.284  |          |
| L2.    |  | .5791886  | 3700.463 | 0.00     | 1.000 | -7252.195 | 7253.354  |          |
| L3.    |  | .9126311  | .        | .        | .     | .         | .         |          |
| L4.    |  | -.1310758 | 56.71331 | -0.00    | 0.998 | -111.2871 | 111.025   |          |
| /sigma |  |           | .2404501 | 52.06303 | 0.00  | 0.498     | 0         | 102.2821 |

Note: The test of the variance against zero is one sided, and the two-sided confidence interval is truncated at zero.

```
. estat ic
```

| Model | Obs | ll(null) | ll(model) | df | AIC      | BIC      |
|-------|-----|----------|-----------|----|----------|----------|
| .     | 70  | .        | -2.954057 | 10 | 25.90811 | 48.39307 |

Note: N=Obs used in calculating BIC; see [R] BIC note

```
. estimates store M30
```

```
.  
.  
.
```

```
. arima lnHi L7DWP L7LST if tin(2012w19, 2013w36), arima(4,1,4)
```

```
(setting optimization to BHHH)
Iteration 0: log likelihood = -7.2070807
Iteration 1: log likelihood = -5.3696846
Iteration 2: log likelihood = -5.2367946
Iteration 3: log likelihood = -4.6309181
Iteration 4: log likelihood = -4.5734749 (backed up)
(switching optimization to BFGS)
Iteration 5: log likelihood = -4.4828996 (backed up)
Iteration 6: log likelihood = -4.1905891 (backed up)
Iteration 7: log likelihood = -3.804735
Iteration 8: log likelihood = -3.3787309
Iteration 9: log likelihood = -3.2797686
Iteration 10: log likelihood = -3.2360336
Iteration 11: log likelihood = -3.1085148
Iteration 12: log likelihood = -3.0710797
Iteration 13: log likelihood = -3.0643017
Iteration 14: log likelihood = -3.0593391
(switching optimization to BHHH)
Iteration 15: log likelihood = -3.0593391 (backed up)
Iteration 16: log likelihood = -3.0535792 (backed up)
Iteration 17: log likelihood = -3.0286064 (backed up)
Iteration 18: log likelihood = -3.0238365 (backed up)
Iteration 19: log likelihood = -2.9095913 (backed up)
(switching optimization to BFGS)
Iteration 20: log likelihood = -2.9095187 (backed up)
Iteration 21: log likelihood = -2.8916874 (backed up)
Iteration 22: log likelihood = -2.653272
Iteration 23: log likelihood = -2.2445247
Iteration 24: log likelihood = -2.1610407
Iteration 25: log likelihood = -1.8977748
Iteration 26: log likelihood = -1.8135675
Iteration 27: log likelihood = -1.7149351
Iteration 28: log likelihood = -1.700635
Iteration 29: log likelihood = -1.6844307
(switching optimization to BHHH)
Iteration 30: log likelihood = -1.6759934
```

```

Iteration 31: log likelihood = -1.6759766 (backed up)
Iteration 32: log likelihood = -1.6758448 (backed up)
Iteration 33: log likelihood = -1.6758167 (backed up)
Iteration 34: log likelihood = -1.6757714 (backed up)
(switching optimization to BFGS)
Iteration 35: log likelihood = -1.6757658 (backed up)
Iteration 36: log likelihood = -1.6757389 (backed up)
Iteration 37: log likelihood = -1.6755766 (backed up)
Iteration 38: log likelihood = -1.6748406
Iteration 39: log likelihood = -1.6747784
Iteration 40: log likelihood = -1.6747649
Iteration 41: log likelihood = -1.6747623
Iteration 42: log likelihood = -1.6747613
Iteration 43: log likelihood = -1.6747613

```

ARIMA regression

```

Sample: 2012w19 - 2013w36          Number of obs   =       70
                                Wald chi2(8)        =       75.64
Log likelihood = -1.674761         Prob > chi2      =       0.0000

```

|       |        | Coef.     | OPG<br>Std. Err. | z     | P> z  | [95% Conf. Interval] |           |
|-------|--------|-----------|------------------|-------|-------|----------------------|-----------|
| ----- |        |           |                  |       |       |                      |           |
| lnHi  |        |           |                  |       |       |                      |           |
|       | L7DWP  |           |                  |       |       |                      |           |
|       | D1.    | .0312037  | .0083254         | 3.75  | 0.000 | .0148862             | .0475212  |
|       | L7LST  |           |                  |       |       |                      |           |
|       | D1.    | .1025752  | .0203534         | 5.04  | 0.000 | .0626834             | .1424671  |
|       | _cons  | -.0126904 | .0109687         | -1.16 | 0.247 | -.0341887            | .0088078  |
| ----- |        |           |                  |       |       |                      |           |
| ARMA  |        |           |                  |       |       |                      |           |
|       | ar     |           |                  |       |       |                      |           |
|       | L1.    | -.075203  | .1420006         | -0.53 | 0.596 | -.353519             | .203113   |
|       | L2.    | .2982293  | .1736459         | 1.72  | 0.086 | -.0421104            | .638569   |
|       | L3.    | -.0094616 | .165471          | -0.06 | 0.954 | -.3337788            | .3148556  |
|       | L4.    | .3916599  | .1723319         | 2.27  | 0.023 | .0538957             | .7294242  |
|       | ma     |           |                  |       |       |                      |           |
|       | L1.    | -.3384826 | .1544162         | -2.19 | 0.028 | -.6411327            | -.0358324 |
|       | L2.    | -4.96e-07 | 36201.89         | -0.00 | 1.000 | -70954.4             | 70954.4   |
|       | L3.    | .3384828  | .                | .     | .     | .                    | .         |
|       | L4.    | -.9999996 | .                | .     | .     | .                    | .         |
| ----- |        |           |                  |       |       |                      |           |
|       | /sigma | .2330033  | .0266203         | 8.75  | 0.000 | .1808285             | .285178   |
| ----- |        |           |                  |       |       |                      |           |

Note: The test of the variance against zero is one sided, and the two-sided confidence interval is truncated at zero.

```

.
. estat ic

```

| Model | Obs | ll(null) | ll(model) | df | AIC      | BIC      |
|-------|-----|----------|-----------|----|----------|----------|
| .     | 70  | .        | -1.674761 | 10 | 23.34952 | 45.83448 |

Note: N=Obs used in calculating BIC; see [R] BIC note

```

.
. estimates store M31
.
.
. arima lnHi L7DWP L7LST if tin(2012w19, 2013w36), arima(5,1,4)

```

(setting optimization to BHHH)

```

Iteration 0: log likelihood = -8.9036424
Iteration 1: log likelihood = -4.5839343
Iteration 2: log likelihood = -4.1481359
Iteration 3: log likelihood = -3.4362395 (not concave)
Iteration 4: log likelihood = -2.7213308
(switching optimization to BFGS)
Iteration 5: log likelihood = -2.7196207 (backed up)
Iteration 6: log likelihood = -2.6951166 (backed up)
Iteration 7: log likelihood = -2.3259387 (backed up)
Iteration 8: log likelihood = -2.1663108
Iteration 9: log likelihood = -2.121233
Iteration 10: log likelihood = -2.089272
Iteration 11: log likelihood = -1.9901325
Iteration 12: log likelihood = -1.8198283
Iteration 13: log likelihood = -1.6375388
Iteration 14: log likelihood = -1.4487008
(switching optimization to BHHH)
Iteration 15: log likelihood = -1.4439771
Iteration 16: log likelihood = -1.4057584 (backed up)
Iteration 17: log likelihood = -1.3757044 (backed up)
Iteration 18: log likelihood = -1.356203 (backed up)
Iteration 19: log likelihood = -1.2648898 (backed up)
(switching optimization to BFGS)
Iteration 20: log likelihood = -1.2643286 (backed up)
Iteration 21: log likelihood = -1.2482869
Iteration 22: log likelihood = -1.1828283 (backed up)
Iteration 23: log likelihood = -.96902274
Iteration 24: log likelihood = -.91887682
Iteration 25: log likelihood = -.90982101
Iteration 26: log likelihood = -.90688745
Iteration 27: log likelihood = -.90593678
Iteration 28: log likelihood = -.90553687
Iteration 29: log likelihood = -.9054921
(switching optimization to BHHH)
Iteration 30: log likelihood = -.90549031 (not concave)
Iteration 31: log likelihood = -.9054903 (not concave)
Iteration 32: log likelihood = -.90549027 (not concave)
Iteration 33: log likelihood = -.90549027 (not concave)
Iteration 34: log likelihood = -.90549027 (not concave)
(switching optimization to BFGS)
Iteration 35: log likelihood = -.90549027

```

ARIMA regression

```

Sample: 2012w19 - 2013w36          Number of obs   =          70
                                   Wald chi2(9)         =   13211.59
Log likelihood = -.9054903         Prob > chi2      =    0.0000

```

|        |       | OPG       |           |       |       |                      |
|--------|-------|-----------|-----------|-------|-------|----------------------|
| D.lnHi |       | Coef.     | Std. Err. | z     | P> z  | [95% Conf. Interval] |
| -----  |       |           |           |       |       |                      |
| lnHi   |       |           |           |       |       |                      |
|        | L7DWP |           |           |       |       |                      |
|        | D1.   | .0277491  | .0069697  | 3.98  | 0.000 | .0140887 .0414096    |
|        | L7LST |           |           |       |       |                      |
|        | D1.   | .0986595  | .0204539  | 4.82  | 0.000 | .0585706 .1387485    |
|        | _cons | -.0219581 | .0352996  | -0.62 | 0.534 | -.0911441 .0472278   |
| -----  |       |           |           |       |       |                      |
| ARMA   |       |           |           |       |       |                      |
|        | ar    |           |           |       |       |                      |
|        | L1.   | -1.921513 | .1974089  | -9.73 | 0.000 | -2.308427 -1.534599  |
|        | L2.   | -1.53587  | .3792623  | -4.05 | 0.000 | -2.27921 -.7925291   |
|        | L3.   | -1.111792 | .3800994  | -2.93 | 0.003 | -1.856773 -.3668112  |
|        | L4.   | -.506518  | .3122983  | -1.62 | 0.105 | -1.118611 .1055754   |
|        | L5.   | .0254745  | .1471463  | 0.17  | 0.863 | -.262927 .313876     |
|        | ma    |           |           |       |       |                      |
|        | L1.   | 1.677391  | .         | .     | .     | .                    |

|        |  |          |          |       |       |          |          |
|--------|--|----------|----------|-------|-------|----------|----------|
| L2.    |  | 1.361685 | .120553  | 11.30 | 0.000 | 1.125405 | 1.597964 |
| L3.    |  | 1.677416 | .        | .     | .     | .        | .        |
| L4.    |  | 1.000007 | .1156127 | 8.65  | 0.000 | .7734101 | 1.226604 |
| -----  |  |          |          |       |       |          |          |
| /sigma |  | .2270149 | .0300544 | 7.55  | 0.000 | .1681093 | .2859205 |
| -----  |  |          |          |       |       |          |          |

Note: The test of the variance against zero is one sided, and the two-sided confidence interval is truncated at zero.

.  
. estat ic

| Model | Obs | ll(null) | ll(model) | df | AIC      | BIC      |
|-------|-----|----------|-----------|----|----------|----------|
| .     | 70  | .        | -.9054903 | 11 | 23.81098 | 48.54443 |

Note: N=Obs used in calculating BIC; see [R] BIC note

. estimates store M32  
.  
.  
.  
. arima lnHi L7DWP L7LST if tin(2012w19, 2013w36), arima(4,1,5)

(setting optimization to BHHH)  
Iteration 0: log likelihood = -7.4439904  
Iteration 1: log likelihood = -5.5089573  
Iteration 2: log likelihood = -4.199391  
Iteration 3: log likelihood = -3.9624919  
Iteration 4: log likelihood = -3.0272778  
(switching optimization to BFGS)  
Iteration 5: log likelihood = -2.8405881  
Iteration 6: log likelihood = -2.376467  
Iteration 7: log likelihood = -1.9627229  
Iteration 8: log likelihood = -1.7794883  
Iteration 9: log likelihood = -1.7033051  
Iteration 10: log likelihood = -1.5869252  
Iteration 11: log likelihood = -1.5184721  
Iteration 12: log likelihood = -1.1863389  
Iteration 13: log likelihood = -.896037  
Iteration 14: log likelihood = -.88254978 (backed up)  
(switching optimization to BHHH)  
Iteration 15: log likelihood = -.77298708  
Iteration 16: log likelihood = -.77145458 (backed up)  
Iteration 17: log likelihood = -.76996278 (backed up)  
Iteration 18: log likelihood = -.73759144 (backed up)  
Iteration 19: log likelihood = -.73424362 (backed up)  
(switching optimization to BFGS)  
Iteration 20: log likelihood = -.72963335 (backed up)  
Iteration 21: log likelihood = -.67415944  
Iteration 22: log likelihood = -.56587957  
Iteration 23: log likelihood = -.39309154  
Iteration 24: log likelihood = -.34785039  
Iteration 25: log likelihood = -.33833904  
Iteration 26: log likelihood = -.33208735  
Iteration 27: log likelihood = -.33112397  
Iteration 28: log likelihood = -.32714911  
Iteration 29: log likelihood = -.32492804  
(switching optimization to BHHH)  
Iteration 30: log likelihood = -.32456464  
Iteration 31: log likelihood = -.32456435 (backed up)  
Iteration 32: log likelihood = -.32456414 (backed up)  
Iteration 33: log likelihood = -.32455832 (backed up)  
Iteration 34: log likelihood = -.32455626 (backed up)  
(switching optimization to BFGS)  
Iteration 35: log likelihood = -.324556 (backed up)  
Iteration 36: log likelihood = -.3245536 (backed up)  
Iteration 37: log likelihood = -.32444203

```

Iteration 38: log likelihood = -.32443475
Iteration 39: log likelihood = -.32439141
Iteration 40: log likelihood = -.32438432
Iteration 41: log likelihood = -.324381
Iteration 42: log likelihood = -.32438043
Iteration 43: log likelihood = -.32437992
Iteration 44: log likelihood = -.3243799

```

ARIMA regression

```

Sample: 2012w19 - 2013w36      Number of obs   =      70
                               Wald chi2(9)         =   33510.55
Log likelihood = -.3243799     Prob > chi2      =    0.0000

```

| D.lnHi |        | OPG       |          | z     | P> z  | [95% Conf. Interval] |           |
|--------|--------|-----------|----------|-------|-------|----------------------|-----------|
|        | Coef.  | Std. Err. |          |       |       |                      |           |
| -----  |        |           |          |       |       |                      |           |
| lnHi   |        |           |          |       |       |                      |           |
|        | L7DWP  |           |          |       |       |                      |           |
|        | D1.    | .0316902  | .0115037 | 2.75  | 0.006 | .0091434             | .054237   |
|        | L7LST  |           |          |       |       |                      |           |
|        | D1.    | .1069342  | .0236404 | 4.52  | 0.000 | .0605998             | .1532686  |
|        | _cons  | -.0155474 | .0406968 | -0.38 | 0.702 | -.0953116            | .0642168  |
| -----  |        |           |          |       |       |                      |           |
| ARMA   |        |           |          |       |       |                      |           |
|        | ar     |           |          |       |       |                      |           |
|        | L1.    | -1.471874 | .2388755 | -6.16 | 0.000 | -1.940061            | -1.003686 |
|        | L2.    | -1.636725 | .3232579 | -5.06 | 0.000 | -2.270299            | -1.003151 |
|        | L3.    | -1.194314 | .3183322 | -3.75 | 0.000 | -1.818234            | -.5703949 |
|        | L4.    | -.236936  | .2369856 | -1.00 | 0.317 | -.7014192            | .2275472  |
|        | ma     |           |          |       |       |                      |           |
|        | L1.    | 1.128897  | .2103231 | 5.37  | 0.000 | .7166709             | 1.541122  |
|        | L2.    | 2.501421  | .        | .     | .     | .                    | .         |
|        | L3.    | 2.698448  | .        | .     | .     | .                    | .         |
|        | L4.    | 1.811045  | .273559  | 6.62  | 0.000 | 1.27488              | 2.347211  |
|        | L5.    | 1.485123  | .6457317 | 2.30  | 0.021 | .2195118             | 2.750733  |
|        | /sigma | .1535425  | .0309318 | 4.96  | 0.000 | .0929172             | .2141677  |
| -----  |        |           |          |       |       |                      |           |

Note: The test of the variance against zero is one sided, and the two-sided confidence interval is truncated at zero.

```

. estat ic

```

| Model | Obs | ll(null) | ll(model) | df | AIC      | BIC      |
|-------|-----|----------|-----------|----|----------|----------|
| .     | 70  | .        | -.3243799 | 11 | 22.64876 | 47.38221 |

Note: N=Obs used in calculating BIC; see [R] BIC note

```

. estimates store M33
.
.
.
.
. arima lnHi L7DWP L7LST if tin(2012w19, 2013w36), arima(5,1,5)

```

```

(setting optimization to BHHH)
Iteration 0: log likelihood = -8.8223069
Iteration 1: log likelihood = -5.1029509
Iteration 2: log likelihood = -3.7090544
Iteration 3: log likelihood = -3.6425884 (backed up)
Iteration 4: log likelihood = -3.0759893
(switching optimization to BFGS)

```

```

Iteration 5:  log likelihood = -3.0584781 (backed up)
Iteration 6:  log likelihood = -2.6118809 (backed up)
Iteration 7:  log likelihood = -2.5646984 (backed up)
Iteration 8:  log likelihood = -2.4513116
Iteration 9:  log likelihood = -2.0669599
Iteration 10: log likelihood = -1.9138389
Iteration 11: log likelihood = -1.464224
Iteration 12: log likelihood = -1.3966835 (backed up)
Iteration 13: log likelihood = -1.0907508
Iteration 14: log likelihood = -1.0340787
(switching optimization to BHHH)
Iteration 15: log likelihood = -.89440802
Iteration 16: log likelihood = -.86344768 (backed up)
Iteration 17: log likelihood = -.77235633
Iteration 18: log likelihood = -.70756281
Iteration 19: log likelihood = -.70482906
(switching optimization to BFGS)
Iteration 20: log likelihood = -.69431773 (backed up)
Iteration 21: log likelihood = -.55889778
Iteration 22: log likelihood = -.35556813
Iteration 23: log likelihood = -.34697315
Iteration 24: log likelihood = -.17703328
Iteration 25: log likelihood = .08651624
Iteration 26: log likelihood = .10457581
Iteration 27: log likelihood = .12218854
Iteration 28: log likelihood = .13383754
Iteration 29: log likelihood = .13549681
(switching optimization to BHHH)
Iteration 30: log likelihood = .13578045
Iteration 31: log likelihood = .13578065 (backed up)
Iteration 32: log likelihood = .13578227 (backed up)
Iteration 33: log likelihood = .13578268 (backed up)
Iteration 34: log likelihood = .13578347 (backed up)
(switching optimization to BFGS)
Iteration 35: log likelihood = .13578348 (backed up)
Iteration 36: log likelihood = .13578371 (backed up)
Iteration 37: log likelihood = .13591387 (backed up)
Iteration 38: log likelihood = .13643989
Iteration 39: log likelihood = .13666104
Iteration 40: log likelihood = .13681918
Iteration 41: log likelihood = .13682272
Iteration 42: log likelihood = .13683159
Iteration 43: log likelihood = .13683246
Iteration 44: log likelihood = .13683283
(switching optimization to BHHH)
Iteration 45: log likelihood = .13683286 (not concave)
Iteration 46: log likelihood = .13683286 (not concave)
Iteration 47: log likelihood = .13683287 (not concave)
Iteration 48: log likelihood = .13683287 (not concave)
Iteration 49: log likelihood = .13683287 (not concave)
(switching optimization to BFGS)
Iteration 50: log likelihood = .13683287

```

ARIMA regression

```

Sample: 2012w19 - 2013w36          Number of obs   =          70
                                Wald chi2(9)         =       3311.61
Log likelihood = .1368329          Prob > chi2      =          0.0000

```

|        |       | OPG       |           |       |       |                      |          |
|--------|-------|-----------|-----------|-------|-------|----------------------|----------|
| D.lnHi |       | Coef.     | Std. Err. | z     | P> z  | [95% Conf. Interval] |          |
| lnHi   | L7DWP |           |           |       |       |                      |          |
|        | D1.   | .0329279  | .0080372  | 4.10  | 0.000 | .0171754             | .0486805 |
|        | L7LST |           |           |       |       |                      |          |
|        | D1.   | .0829415  | .0195379  | 4.25  | 0.000 | .0446479             | .1212351 |
|        | _cons | -.0191424 | .0401045  | -0.48 | 0.633 | -.0977458            | .0594609 |

```

-----+-----
ARMA
  ar |
L1. | -1.439751 .2082432 -6.91 0.000 -1.8479 -1.031601
L2. | -1.822584 .3419752 -5.33 0.000 -2.492843 -1.152325
L3. | -1.496998 .3962825 -3.78 0.000 -2.273698 -.720299
L4. | -.5517668 .3253167 -1.70 0.090 -1.189376 .0858422
L5. | -.2793657 .1620035 -1.72 0.085 -.5968867 .0381554
  |
  ma |
L1. | 1.159222 .1290978 8.98 0.000 .9061946 1.412249
L2. | 2.006867 . . . . .
L3. | 2.006866 . . . . .
L4. | 1.159221 . . . . .
L5. | .9999988 .1520516 6.58 0.000 .7019833 1.298014
-----+-----
/sigma | .2227257 .0326689 6.82 0.000 .1586958 .2867557
-----+-----

```

Note: The test of the variance against zero is one sided, and the two-sided confidence interval is truncated at zero.

```

.
. estat ic

```

```

-----+-----
Model | Obs ll(null) ll(model) df AIC BIC
-----+-----
. | 70 . .1368329 11 21.72633 46.45978
-----+-----

```

Note: N=Obs used in calculating BIC; see [R] BIC note

```

.
. estimates store M34

```

```

.
.
.
.
.

```

```

. arima lnHi L7DWP L7LST if tin(2012w19, 2013w36), arima(6,1,5)

```

```

(setting optimization to BHHH)
Iteration 0: log likelihood = -9.7314096
Iteration 1: log likelihood = -4.9454522
Iteration 2: log likelihood = -3.4487411
Iteration 3: log likelihood = -3.3578193
Iteration 4: log likelihood = -3.3576536 (not concave)
(switching optimization to BFGS)
Iteration 5: log likelihood = -1.0563238
Iteration 6: log likelihood = -.81445442
Iteration 7: log likelihood = -.44125328
Iteration 8: log likelihood = -.32520169
Iteration 9: log likelihood = -.284345
Iteration 10: log likelihood = -.28112462
Iteration 11: log likelihood = -.25233357
Iteration 12: log likelihood = -.22425836
Iteration 13: log likelihood = -.18765604
Iteration 14: log likelihood = -.14910609
(switching optimization to BHHH)
Iteration 15: log likelihood = -.11403508
Iteration 16: log likelihood = -.11363289 (backed up)
Iteration 17: log likelihood = -.11363235 (backed up)
Iteration 18: log likelihood = -.11363105 (backed up)
Iteration 19: log likelihood = -.11362552 (backed up)
(switching optimization to BFGS)
Iteration 20: log likelihood = -.11354671 (backed up)
Iteration 21: log likelihood = -.11331772 (backed up)
Iteration 22: log likelihood = -.11279594
Iteration 23: log likelihood = -.09995428
Iteration 24: log likelihood = -.09830908
Iteration 25: log likelihood = -.09694938

```

```

Iteration 26: log likelihood = -.09642456
Iteration 27: log likelihood = -.09571922
Iteration 28: log likelihood = -.09564546
Iteration 29: log likelihood = -.09563555
(switching optimization to BHHH)
Iteration 30: log likelihood = -.09563344 (not concave)
Iteration 31: log likelihood = -.09563308
Iteration 32: log likelihood = -.09563302 (backed up)
Iteration 33: log likelihood = -.09563298 (backed up)
Iteration 34: log likelihood = -.09563298 (not concave)
(switching optimization to BFGS)
Iteration 35: log likelihood = -.0956329
Iteration 36: log likelihood = -.09563289 (backed up)
Iteration 37: log likelihood = -.09563286 (backed up)
Iteration 38: log likelihood = -.09563286 (backed up)
Iteration 39: log likelihood = -.09563286 (backed up)
Iteration 40: log likelihood = -.09563286 (backed up)
Iteration 41: log likelihood = -.09563286 (backed up)
Iteration 42: log likelihood = -.09563286 (backed up)
Iteration 43: log likelihood = -.09563286 (backed up)
Iteration 44: log likelihood = -.09563286 (backed up)
(switching optimization to BHHH)
Iteration 45: log likelihood = -.09563286 (backed up)
Iteration 46: log likelihood = -.09563286 (not concave)
Iteration 47: log likelihood = -.09563285 (not concave)
Iteration 48: log likelihood = -.09563285 (not concave)
Iteration 49: log likelihood = -.09563285 (not concave)
(switching optimization to BFGS)
Iteration 50: log likelihood = -.09563285

```

ARIMA regression

```

Sample: 2012w19 - 2013w36          Number of obs   =          70
                                   Wald chi2(10)       =         127.73
Log likelihood = -.0956328         Prob > chi2      =          0.0000

```

|        |        | OPG       |           |       |       |                      |          |
|--------|--------|-----------|-----------|-------|-------|----------------------|----------|
| D.lnHi |        | Coef.     | Std. Err. | z     | P> z  | [95% Conf. Interval] |          |
| -----  |        |           |           |       |       |                      |          |
| lnHi   |        |           |           |       |       |                      |          |
|        | L7DWP  |           |           |       |       |                      |          |
|        | D1.    | .031413   | .0120516  | 2.61  | 0.009 | .0077922             | .0550337 |
|        | L7LST  |           |           |       |       |                      |          |
|        | D1.    | .1212937  | .0270972  | 4.48  | 0.000 | .0681842             | .1744032 |
|        | _cons  | -.0085381 | .0075858  | -1.13 | 0.260 | -.0234061            | .0063299 |
| -----  |        |           |           |       |       |                      |          |
| ARMA   |        |           |           |       |       |                      |          |
|        | ar     |           |           |       |       |                      |          |
|        | L1.    | -.1088023 | .4293419  | -0.25 | 0.800 | -.9502969            | .7326923 |
|        | L2.    | .2908357  | .1835527  | 1.58  | 0.113 | -.0689209            | .6505923 |
|        | L3.    | .1937089  | .1332567  | 1.45  | 0.146 | -.0674695            | .4548873 |
|        | L4.    | .5850845  | .1364439  | 4.29  | 0.000 | .3176594             | .8525096 |
|        | L5.    | -.1856658 | .2702609  | -0.69 | 0.492 | -.7153675            | .3440359 |
|        | L6.    | -.3550061 | .1461252  | -2.43 | 0.015 | -.6414063            | -.068606 |
|        | ma     |           |           |       |       |                      |          |
|        | L1.    | -.3058928 | .         | .     | .     | .                    | .        |
|        | L2.    | .0123934  | .         | .     | .     | .                    | .        |
|        | L3.    | .0480795  | .4593642  | 0.10  | 0.917 | -.8522578            | .9484168 |
|        | L4.    | -1.012396 | .         | .     | .     | .                    | .        |
|        | L5.    | .257816   | .4568874  | 0.56  | 0.573 | -.6376668            | 1.153299 |
| -----  |        |           |           |       |       |                      |          |
|        | /sigma | .2254344  | .0278798  | 8.09  | 0.000 | .1707911             | .2800777 |
| -----  |        |           |           |       |       |                      |          |

Note: The test of the variance against zero is one sided, and the two-sided confidence interval is truncated at zero.



```
. estat ic
```

| Model | Obs | ll(null) | ll(model) | df | AIC      | BIC      |
|-------|-----|----------|-----------|----|----------|----------|
| .     | 70  | .        | -.0956328 | 12 | 24.19127 | 51.17321 |

Note: N=Obs used in calculating BIC; see [R] BIC note

```
. estimates store M35
```

```
.  
. .  
. .  
. .  
. .
```

```
. arima lnHi L7DWP L7LST if tin(2012w19, 2013w36), arima(6,1,6)
```

```
(setting optimization to BHHH)
```

```
Iteration 0: log likelihood = -10.484445  
Iteration 1: log likelihood = -5.7755702  
Iteration 2: log likelihood = -5.7541991 (backed up)  
Iteration 3: log likelihood = -5.7534724 (backed up)  
Iteration 4: log likelihood = -5.7534681 (backed up)
```

```
(switching optimization to BFGS)
```

```
Iteration 5: log likelihood = -5.7534677 (backed up)  
Iteration 6: log likelihood = -3.9819497  
Iteration 7: log likelihood = -3.8694801  
Iteration 8: log likelihood = -1.4851995  
Iteration 9: log likelihood = -.08461663  
Iteration 10: log likelihood = .26252501 (backed up)  
Iteration 11: log likelihood = .75570134  
Iteration 12: log likelihood = 1.1154924  
Iteration 13: log likelihood = 1.3344716  
Iteration 14: log likelihood = 1.3938502
```

```
(switching optimization to BHHH)
```

```
Iteration 15: log likelihood = 1.4889979  
Iteration 16: log likelihood = 1.4890462 (backed up)  
Iteration 17: log likelihood = 1.4891336 (backed up)  
Iteration 18: log likelihood = 1.4891551 (backed up)  
Iteration 19: log likelihood = 1.4891602 (backed up)
```

```
(switching optimization to BFGS)
```

```
Iteration 20: log likelihood = 1.4891704 (backed up)  
Iteration 21: log likelihood = 1.4891784 (backed up)  
Iteration 22: log likelihood = 1.7737806  
Iteration 23: log likelihood = 1.8476384  
Iteration 24: log likelihood = 2.0209928  
Iteration 25: log likelihood = 2.0787505  
Iteration 26: log likelihood = 2.1173627  
Iteration 27: log likelihood = 2.1363736  
Iteration 28: log likelihood = 2.1411076  
Iteration 29: log likelihood = 2.1440631
```

```
(switching optimization to BHHH)
```

```
Iteration 30: log likelihood = 2.1444922  
Iteration 31: log likelihood = 2.1444923 (backed up)  
Iteration 32: log likelihood = 2.1444923 (backed up)  
Iteration 33: log likelihood = 2.1444933 (backed up)  
Iteration 34: log likelihood = 2.1444944 (backed up)
```

```
(switching optimization to BFGS)
```

```
Iteration 35: log likelihood = 2.144499 (backed up)  
Iteration 36: log likelihood = 2.1445002 (backed up)  
Iteration 37: log likelihood = 2.1445004 (backed up)  
Iteration 38: log likelihood = 2.144583  
Iteration 39: log likelihood = 2.1445909  
Iteration 40: log likelihood = 2.1446312  
Iteration 41: log likelihood = 2.1446345  
Iteration 42: log likelihood = 2.1446354  
Iteration 43: log likelihood = 2.1446357
```

```
ARIMA regression
```

Sample: 2012w19 - 2013w36  
 Log likelihood = 2.144636

Number of obs = 70  
 Wald chi2(11) = 28055.69  
 Prob > chi2 = 0.0000

| D.lnHi |     | Coef.     | OPG<br>Std. Err. | z     | P> z  | [95% Conf. Interval] |           |
|--------|-----|-----------|------------------|-------|-------|----------------------|-----------|
| lnHi   |     |           |                  |       |       |                      |           |
| L7DWP  | D1. | .0323895  | .0143801         | 2.25  | 0.024 | .0042051             | .060574   |
| L7LST  | D1. | .1065709  | .0249831         | 4.27  | 0.000 | .057605              | .1555368  |
| _cons  |     | -.0101065 | .0100923         | -1.00 | 0.317 | -.0298871            | .0096741  |
| ARMA   |     |           |                  |       |       |                      |           |
| ar     |     |           |                  |       |       |                      |           |
| L1.    |     | -.5466847 | .2586152         | -2.11 | 0.035 | -1.053561            | -.0398083 |
| L2.    |     | -.4334176 | .2632515         | -1.65 | 0.100 | -.9493811            | .0825459  |
| L3.    |     | .1234847  | .1538215         | 0.80  | 0.422 | -.1779999            | .4249693  |
| L4.    |     | .6958297  | .1827636         | 3.81  | 0.000 | .3376197             | 1.05404   |
| L5.    |     | .0939592  | .2931313         | 0.32  | 0.749 | -.4805676            | .6684861  |
| L6.    |     | .0387682  | .2495115         | 0.16  | 0.877 | -.4502654            | .5278017  |
| ma     |     |           |                  |       |       |                      |           |
| L1.    |     | .1859132  | .2340348         | 0.79  | 0.427 | -.2727865            | .6446129  |
| L2.    |     | .6804413  | .                | .     | .     | .                    | .         |
| L3.    |     | -.093096  | .                | .     | .     | .                    | .         |
| L4.    |     | -.903964  | .                | .     | .     | .                    | .         |
| L5.    |     | -.0928176 | .2243692         | -0.41 | 0.679 | -.5325731            | .3469379  |
| L6.    |     | -.7764773 | .1503228         | -5.17 | 0.000 | -1.071105            | -.48185   |
| /sigma |     | .2174904  | .0273259         | 7.96  | 0.000 | .1639327             | .2710481  |

Note: The test of the variance against zero is one sided, and the two-sided confidence interval is truncated at zero.

.  
 . estat ic

| Model | Obs | ll(null) | ll(model) | df | AIC      | BIC      |
|-------|-----|----------|-----------|----|----------|----------|
| .     | 70  | .        | 2.144636  | 13 | 21.71073 | 50.94117 |

Note: N=Obs used in calculating BIC; see [R] BIC note

.  
 . estimates store M36  
 .  
 .  
 . arima lnHi L7DWP L7LST L5NDVI L7NDVI if tin(2012w19, 2013w36), arima(6,1,5)

(setting optimization to BHHH)  
 Iteration 0: log likelihood = -9.0988403  
 Iteration 1: log likelihood = -3.753652  
 Iteration 2: log likelihood = -3.6865272  
 Iteration 3: log likelihood = -2.3544431  
 Iteration 4: log likelihood = .17834954  
 (switching optimization to BFGS)  
 Iteration 5: log likelihood = 1.6714045  
 Iteration 6: log likelihood = 2.0529322  
 Iteration 7: log likelihood = 2.82479  
 Iteration 8: log likelihood = 2.9236373  
 Iteration 9: log likelihood = 4.5847295  
 Iteration 10: log likelihood = 5.2326107

```

Iteration 11: log likelihood = 5.5099667
Iteration 12: log likelihood = 5.8557078
Iteration 13: log likelihood = 5.8918975
Iteration 14: log likelihood = 5.9022964
(switching optimization to BHHH)
Iteration 15: log likelihood = 6.4127676
Iteration 16: log likelihood = 6.548209
Iteration 17: log likelihood = 6.5610617 (backed up)
Iteration 18: log likelihood = 6.6050767 (backed up)
Iteration 19: log likelihood = 6.6098056 (backed up)
(switching optimization to BFGS)
Iteration 20: log likelihood = 6.610081 (backed up)
Iteration 21: log likelihood = 6.7251534
Iteration 22: log likelihood = 7.0449468
Iteration 23: log likelihood = 7.0930408
Iteration 24: log likelihood = 7.1830244
Iteration 25: log likelihood = 7.2536584
Iteration 26: log likelihood = 7.2870306
Iteration 27: log likelihood = 7.3172958
Iteration 28: log likelihood = 7.3189367
Iteration 29: log likelihood = 7.3249916
(switching optimization to BHHH)
Iteration 30: log likelihood = 7.3280113
Iteration 31: log likelihood = 7.3280115 (not concave)
Iteration 32: log likelihood = 7.3285108
Iteration 33: log likelihood = 7.3285109 (backed up)
Iteration 34: log likelihood = 7.328511 (backed up)
(switching optimization to BFGS)
Iteration 35: log likelihood = 7.3285111 (backed up)
Iteration 36: log likelihood = 7.3285658 (backed up)
Iteration 37: log likelihood = 7.3287023 (backed up)
Iteration 38: log likelihood = 7.3288782
Iteration 39: log likelihood = 7.3289983
Iteration 40: log likelihood = 7.329146
Iteration 41: log likelihood = 7.3291738
Iteration 42: log likelihood = 7.3291826
Iteration 43: log likelihood = 7.3291842
Iteration 44: log likelihood = 7.3291848

```

ARIMA regression

```

Sample: 2012w19 - 2013w36          Number of obs   =          70
                                   Wald chi2(12)        =       2332.22
Log likelihood = 7.329185          Prob > chi2      =          0.0000

```

| ----- |        |           |                  |       |       |                      |           |
|-------|--------|-----------|------------------|-------|-------|----------------------|-----------|
|       | D.lnHi | Coef.     | OPG<br>Std. Err. | z     | P> z  | [95% Conf. Interval] |           |
| ----- |        |           |                  |       |       |                      |           |
| lnHi  | L7DWP  |           |                  |       |       |                      |           |
|       | D1.    | .0325667  | .0122657         | 2.66  | 0.008 | .0085264             | .056607   |
|       | L7LST  |           |                  |       |       |                      |           |
|       | D1.    | .1404217  | .0171067         | 8.21  | 0.000 | .1068931             | .1739502  |
|       | L5NDVI |           |                  |       |       |                      |           |
|       | D1.    | .8278705  | .6310043         | 1.31  | 0.190 | -.4088752            | 2.064616  |
|       | L7NDVI |           |                  |       |       |                      |           |
|       | D1.    | 1.384557  | .4872082         | 2.84  | 0.004 | .4296462             | 2.339467  |
|       | _cons  | -.0095866 | .0016796         | -5.71 | 0.000 | -.0128786            | -.0062947 |
| ----- |        |           |                  |       |       |                      |           |
| ARMA  | ar     |           |                  |       |       |                      |           |
|       | L1.    | .1528434  | .1979723         | 0.77  | 0.440 | -.2351752            | .5408619  |
|       | L2.    | .4104153  | .1342139         | 3.06  | 0.002 | .1473608             | .6734698  |
|       | L3.    | .1320319  | .1658664         | 0.80  | 0.426 | -.1930603            | .4571241  |
|       | L4.    | .531294   | .1102072         | 4.82  | 0.000 | .315292              | .7472961  |
|       | L5.    | -.4528669 | .1481085         | -3.06 | 0.002 | -.7431543            | -.1625796 |

|        |  |           |          |       |       |           |           |
|--------|--|-----------|----------|-------|-------|-----------|-----------|
| L6.    |  | -.4063789 | .1776436 | -2.29 | 0.022 | -.754554  | -.0582039 |
| ma     |  |           |          |       |       |           |           |
| L1.    |  | -.9769594 | .        | .     | .     | .         | .         |
| L2.    |  | -.0166803 | .        | .     | .     | .         | .         |
| L3.    |  | -.016698  | .224815  | -0.07 | 0.941 | -.4573273 | .4239313  |
| L4.    |  | -.9769506 | .2143595 | -4.56 | 0.000 | -1.397087 | -.5568138 |
| L5.    |  | .9999984  | .        | .     | .     | .         | .         |
| -----  |  |           |          |       |       |           |           |
| /sigma |  | .1948034  | .0325176 | 5.99  | 0.000 | .1310701  | .2585367  |
| -----  |  |           |          |       |       |           |           |

Note: The test of the variance against zero is one sided, and the two-sided confidence interval is truncated at zero.

.  
. estat ic

| Model | Obs | ll(null) | ll(model) | df | AIC      | BIC      |
|-------|-----|----------|-----------|----|----------|----------|
| .     | 70  | .        | 7.329185  | 14 | 13.34163 | 44.82056 |

Note: N=Obs used in calculating BIC; see [R] BIC note

. estimates store M37

. arima lnHi L7DWP L7LST L5NDVI L7NDVI if tin(2012w19, 2013w36), arima(5,1,5)

```
(setting optimization to BHHH)
Iteration 0: log likelihood = -8.6259497
Iteration 1: log likelihood = -6.9531401
Iteration 2: log likelihood = -6.8971663
Iteration 3: log likelihood = -6.2995247
Iteration 4: log likelihood = -5.1545915
(switching optimization to BFGS)
Iteration 5: log likelihood = -1.8839926
Iteration 6: log likelihood = -1.8603221 (backed up)
Iteration 7: log likelihood = -1.7920547 (backed up)
Iteration 8: log likelihood = -.43751299
Iteration 9: log likelihood = .00740859
Iteration 10: log likelihood = .42376019
Iteration 11: log likelihood = .67841773
Iteration 12: log likelihood = .93662865
Iteration 13: log likelihood = 1.1373631
Iteration 14: log likelihood = 1.3448334
(switching optimization to BHHH)
Iteration 15: log likelihood = 1.6684655
Iteration 16: log likelihood = 1.6686229 (backed up)
Iteration 17: log likelihood = 1.6697304 (backed up)
Iteration 18: log likelihood = 1.6732697 (backed up)
Iteration 19: log likelihood = 1.676284 (backed up)
(switching optimization to BFGS)
Iteration 20: log likelihood = 1.6790581 (backed up)
Iteration 21: log likelihood = 1.6860438
Iteration 22: log likelihood = 2.0392591
Iteration 23: log likelihood = 2.0732926
Iteration 24: log likelihood = 2.2746783
Iteration 25: log likelihood = 2.3206486
Iteration 26: log likelihood = 2.34465
Iteration 27: log likelihood = 2.3500975
Iteration 28: log likelihood = 2.3641456
Iteration 29: log likelihood = 2.3657178
(switching optimization to BHHH)
Iteration 30: log likelihood = 2.3659759 (not concave)
Iteration 31: log likelihood = 2.3660538 (not concave)
Iteration 32: log likelihood = 2.3660745 (not concave)
Iteration 33: log likelihood = 2.3660851 (not concave)
```

Iteration 34: log likelihood = 2.366091 (not concave)  
(switching optimization to BFGS)  
Iteration 35: log likelihood = 2.3660976  
Iteration 36: log likelihood = 2.3661251 (backed up)  
Iteration 37: log likelihood = 2.3661274 (backed up)  
Iteration 38: log likelihood = 2.3661278 (backed up)  
Iteration 39: log likelihood = 2.3661283 (backed up)  
Iteration 40: log likelihood = 2.3661286 (backed up)  
Iteration 41: log likelihood = 2.3661294 (backed up)  
Iteration 42: log likelihood = 2.3661295 (backed up)  
Iteration 43: log likelihood = 2.3661297 (backed up)  
Iteration 44: log likelihood = 2.3661298 (backed up)  
(switching optimization to BHHH)  
Iteration 45: log likelihood = 2.3661308 (backed up)  
Iteration 46: log likelihood = 2.3661314 (backed up)  
Iteration 47: log likelihood = 2.3661317 (not concave)  
Iteration 48: log likelihood = 2.3661364 (not concave)  
Iteration 49: log likelihood = 2.3661389 (not concave)  
(switching optimization to BFGS)  
Iteration 50: log likelihood = 2.3661412  
Iteration 51: log likelihood = 2.3661648 (backed up)  
Iteration 52: log likelihood = 2.366166 (backed up)  
Iteration 53: log likelihood = 2.3661663 (backed up)  
Iteration 54: log likelihood = 2.3661664 (backed up)  
Iteration 55: log likelihood = 2.3661664 (backed up)  
Iteration 56: log likelihood = 2.3661667 (backed up)  
Iteration 57: log likelihood = 2.3661675 (backed up)  
Iteration 58: log likelihood = 2.3661676 (backed up)  
Iteration 59: log likelihood = 2.3661679 (backed up)  
(switching optimization to BHHH)  
Iteration 60: log likelihood = 2.3661682 (not concave)  
Iteration 61: log likelihood = 2.3661684 (not concave)  
Iteration 62: log likelihood = 2.3661685 (not concave)  
Iteration 63: log likelihood = 2.3661687 (not concave)  
Iteration 64: log likelihood = 2.3661688 (not concave)  
(switching optimization to BFGS)  
Iteration 65: log likelihood = 2.3661689  
Iteration 66: log likelihood = 2.3661689 (backed up)  
Iteration 67: log likelihood = 2.366169 (backed up)  
Iteration 68: log likelihood = 2.3661691 (backed up)  
Iteration 69: log likelihood = 2.3661691 (backed up)  
Iteration 70: log likelihood = 2.3661691 (backed up)  
Iteration 71: log likelihood = 2.3661692 (backed up)  
Iteration 72: log likelihood = 2.3661692 (backed up)  
Iteration 73: log likelihood = 2.3661692 (backed up)  
Iteration 74: log likelihood = 2.3661692 (backed up)  
(switching optimization to BHHH)  
Iteration 75: log likelihood = 2.3661692 (not concave)  
Iteration 76: log likelihood = 2.3661693 (not concave)  
Iteration 77: log likelihood = 2.3661693 (not concave)  
Iteration 78: log likelihood = 2.3661693 (not concave)  
Iteration 79: log likelihood = 2.3661693 (not concave)  
(switching optimization to BFGS)  
Iteration 80: log likelihood = 2.3661693  
Iteration 81: log likelihood = 2.3661693 (backed up)  
Iteration 82: log likelihood = 2.3661694 (backed up)  
Iteration 83: log likelihood = 2.3661694 (backed up)  
Iteration 84: log likelihood = 2.3661694 (backed up)  
Iteration 85: log likelihood = 2.3661694 (backed up)  
Iteration 86: log likelihood = 2.3661694 (backed up)  
Iteration 87: log likelihood = 2.3661694 (backed up)  
Iteration 88: log likelihood = 2.3661694 (backed up)  
Iteration 89: log likelihood = 2.3661694 (backed up)  
(switching optimization to BHHH)  
Iteration 90: log likelihood = 2.3661694 (not concave)  
Iteration 91: log likelihood = 2.3661694 (not concave)  
Iteration 92: log likelihood = 2.3661694 (not concave)  
Iteration 93: log likelihood = 2.3661694 (not concave)  
Iteration 94: log likelihood = 2.3661694 (not concave)  
(switching optimization to BFGS)  
Iteration 95: log likelihood = 2.3661694

ARIMA regression

Sample: 2012w19 - 2013w36                      Number of obs        =        70  
 Log likelihood = 2.366169                      Wald chi2(11)        =       8926.00  
                                                  Prob > chi2           =       0.0000

```
-----+-----
```

| D.lnHi      | Coef.     | OPG<br>Std. Err. | z     | P> z  | [95% Conf. Interval] |           |
|-------------|-----------|------------------|-------|-------|----------------------|-----------|
| -----+----- |           |                  |       |       |                      |           |
| lnHi        |           |                  |       |       |                      |           |
| L7DWP       |           |                  |       |       |                      |           |
| D1.         | .0297894  | .0092286         | 3.23  | 0.001 | .0117017             | .0478771  |
| L7LST       |           |                  |       |       |                      |           |
| D1.         | .0927742  | .0230971         | 4.02  | 0.000 | .0475048             | .1380437  |
| L5NDVI      |           |                  |       |       |                      |           |
| D1.         | 1.031031  | .6701947         | 1.54  | 0.124 | -.282526             | 2.344589  |
| L7NDVI      |           |                  |       |       |                      |           |
| D1.         | 1.410961  | .6441065         | 2.19  | 0.028 | .1485356             | 2.673387  |
| _cons       | -.0094847 | .0058952         | -1.61 | 0.108 | -.0210392            | .0020697  |
| -----+----- |           |                  |       |       |                      |           |
| ARMA        |           |                  |       |       |                      |           |
| ar          |           |                  |       |       |                      |           |
| L1.         | -1.190511 | .1548594         | -7.69 | 0.000 | -1.49403             | -.8869921 |
| L2.         | -.0864805 | .2843526         | -0.30 | 0.761 | -.6438014            | .4708404  |
| L3.         | .0146235  | .2440309         | 0.06  | 0.952 | -.4636682            | .4929152  |
| L4.         | .3262406  | .2933412         | 1.11  | 0.266 | -.2486975            | .9011787  |
| L5.         | .4663633  | .1622761         | 2.87  | 0.004 | .1483079             | .7844186  |
| ma          |           |                  |       |       |                      |           |
| L1.         | .7111666  | .1972891         | 3.60  | 0.000 | .3244871             | 1.097846  |
| L2.         | -.2699879 | .                | .     | .     | .                    | .         |
| L3.         | .2700154  | .1925918         | 1.40  | 0.161 | -.1074577            | .6474884  |
| L4.         | -.7112077 | .                | .     | .     | .                    | .         |
| L5.         | -1.000035 | .                | .     | .     | .                    | .         |
| /sigma      | .2157641  | .0224006         | 9.63  | 0.000 | .1718597             | .2596685  |

Note: The test of the variance against zero is one sided, and the two-sided confidence interval is truncated at zero.

. estat ic

```
-----+-----
```

| Model | Obs | ll(null) | ll(model) | df | AIC      | BIC     |
|-------|-----|----------|-----------|----|----------|---------|
| .     | 70  | .        | 2.366169  | 13 | 21.26766 | 50.4981 |

```
-----+-----
```

Note: N=Obs used in calculating BIC; see [R] BIC note

. estimates store M38

. arima lnHi L7DWP L7LST L5NDVI L7NDVI if tin(2012w19, 2013w36), arima(4,1,5)

(setting optimization to BHHH)  
 Iteration 0: log likelihood = -7.5377054  
 Iteration 1: log likelihood = -5.7167335  
 Iteration 2: log likelihood = -5.6998595 (backed up)  
 Iteration 3: log likelihood = -5.6955487 (backed up)  
 Iteration 4: log likelihood = -5.6952544 (backed up)  
 (switching optimization to BFGS)

```

Iteration 5: log likelihood = -5.6858519 (backed up)
Iteration 6: log likelihood = -2.5369203
Iteration 7: log likelihood = -1.9739519
Iteration 8: log likelihood = -.86960564
Iteration 9: log likelihood = -.6129126
Iteration 10: log likelihood = -.32858821
Iteration 11: log likelihood = -.08267033
Iteration 12: log likelihood = -.02310451
Iteration 13: log likelihood = .08795086
Iteration 14: log likelihood = .16085068
(switching optimization to BHHH)
Iteration 15: log likelihood = .17231189
Iteration 16: log likelihood = .17232923 (backed up)
Iteration 17: log likelihood = .17233221 (backed up)
Iteration 18: log likelihood = .17233225 (backed up)
Iteration 19: log likelihood = .17233226 (backed up)
(switching optimization to BFGS)
Iteration 20: log likelihood = .17233228 (backed up)
Iteration 21: log likelihood = .17279008 (backed up)
Iteration 22: log likelihood = .17707584
Iteration 23: log likelihood = .17883138
Iteration 24: log likelihood = .18054497
Iteration 25: log likelihood = .18118543
Iteration 26: log likelihood = .18143258
Iteration 27: log likelihood = .18152745
Iteration 28: log likelihood = .1817194
Iteration 29: log likelihood = .18173679
(switching optimization to BHHH)
Iteration 30: log likelihood = .18174197 (not concave)
Iteration 31: log likelihood = .18174206 (not concave)
Iteration 32: log likelihood = .18174207
Iteration 33: log likelihood = .18174208 (not concave)
Iteration 34: log likelihood = .18174208 (not concave)
(switching optimization to BFGS)
Iteration 35: log likelihood = .18174208
Iteration 36: log likelihood = .18174208 (backed up)
Iteration 37: log likelihood = .18174208 (backed up)
Iteration 38: log likelihood = .18174208 (backed up)
Iteration 39: log likelihood = .18174208 (backed up)
Iteration 40: log likelihood = .18174208 (backed up)
Iteration 41: log likelihood = .18174208 (backed up)
Iteration 42: log likelihood = .18174208 (backed up)
Iteration 43: log likelihood = .18174208 (backed up)
Iteration 44: log likelihood = .18174208 (backed up)
(switching optimization to BHHH)
Iteration 45: log likelihood = .18174208 (not concave)
Iteration 46: log likelihood = .18174208 (not concave)
Iteration 47: log likelihood = .18174208 (not concave)
Iteration 48: log likelihood = .18174209 (not concave)
Iteration 49: log likelihood = .18174209 (not concave)
(switching optimization to BFGS)
Iteration 50: log likelihood = .18174209

```

ARIMA regression

```

Sample: 2012w19 - 2013w36
Number of obs = 70
Wald chi2(11) = 169.46
Log likelihood = .1817421
Prob > chi2 = 0.0000

```

|        |        | OPG      |           |      |       |                      |          |
|--------|--------|----------|-----------|------|-------|----------------------|----------|
| D.lnHi |        | Coef.    | Std. Err. | z    | P> z  | [95% Conf. Interval] |          |
| lnHi   | L7DWP  |          |           |      |       |                      |          |
|        | D1.    | .0332634 | .0098597  | 3.37 | 0.001 | .0139386             | .0525881 |
|        | L7LST  |          |           |      |       |                      |          |
|        | D1.    | .0899009 | .0243424  | 3.69 | 0.000 | .0421907             | .1376112 |
|        | L5NDVI |          |           |      |       |                      |          |

|        |           |          |       |       |           |          |
|--------|-----------|----------|-------|-------|-----------|----------|
| D1.    | .8351238  | .6194121 | 1.35  | 0.178 | -.3789016 | 2.049149 |
| L7NDVI |           |          |       |       |           |          |
| D1.    | 1.327547  | .6053621 | 2.19  | 0.028 | .141059   | 2.514035 |
| _cons  | -.0090746 | .0060191 | -1.51 | 0.132 | -.0208718 | .0027226 |
| -----  |           |          |       |       |           |          |
| ARMA   |           |          |       |       |           |          |
| ar     |           |          |       |       |           |          |
| L1.    | -.1792738 | .5871357 | -0.31 | 0.760 | -1.330039 | .9714911 |
| L2.    | .1817347  | .2382908 | 0.76  | 0.446 | -.2853066 | .648776  |
| L3.    | -.1227614 | .1783554 | -0.69 | 0.491 | -.4723315 | .2268088 |
| L4.    | .3864101  | .2046556 | 1.89  | 0.059 | -.0147076 | .7875277 |
| ma     |           |          |       |       |           |          |
| L1.    | -.3786442 | .8603982 | -0.44 | 0.660 | -2.064994 | 1.307705 |
| L2.    | .0452942  | .        | .     | .     | .         | .        |
| L3.    | .2697856  | .4878272 | 0.55  | 0.580 | -.6863382 | 1.225909 |
| L4.    | -.9968925 | .        | .     | .     | .         | .        |
| L5.    | .0604583  | .4957896 | 0.12  | 0.903 | -.9112714 | 1.032188 |
| -----  |           |          |       |       |           |          |
| /sigma | .2284507  | .0317594 | 7.19  | 0.000 | .1662034  | .2906981 |

Note: The test of the variance against zero is one sided, and the two-sided confidence interval is truncated at zero.

.  
. estat ic

| Model | Obs | ll(null) | ll(model) | df | AIC      | BIC      |
|-------|-----|----------|-----------|----|----------|----------|
| .     | 70  | .        | .1817421  | 13 | 25.63652 | 54.86695 |

Note: N=Obs used in calculating BIC; see [R] BIC note

. estimates store M39

. arima lnHi L7DWP L7LST L5NDVI L7NDVI if tin(2012w19, 2013w36), arima(4,1,4)

```
(setting optimization to BHHH)
Iteration 0: log likelihood = -7.3257399
Iteration 1: log likelihood = -4.753895
Iteration 2: log likelihood = -4.567625
Iteration 3: log likelihood = -4.4877472 (backed up)
Iteration 4: log likelihood = -4.4873649 (backed up)
(switching optimization to BFGS)
Iteration 5: log likelihood = -4.4873088 (backed up)
Iteration 6: log likelihood = -1.8132975
Iteration 7: log likelihood = -.84778752
Iteration 8: log likelihood = -.42186544
Iteration 9: log likelihood = -.29792567
Iteration 10: log likelihood = -.14047295
Iteration 11: log likelihood = -.08906573
Iteration 12: log likelihood = .08832849
Iteration 13: log likelihood = .09951972
Iteration 14: log likelihood = .13238818
(switching optimization to BHHH)
Iteration 15: log likelihood = .13996654
Iteration 16: log likelihood = .13996778 (backed up)
Iteration 17: log likelihood = .13996822 (backed up)
Iteration 18: log likelihood = .13996828 (backed up)
Iteration 19: log likelihood = .13996828 (backed up)
(switching optimization to BFGS)
Iteration 20: log likelihood = .13996828 (backed up)
Iteration 21: log likelihood = .14182455 (backed up)
Iteration 22: log likelihood = .14570765
```



```

Iteration 23: log likelihood = .14686778
Iteration 24: log likelihood = .1474736
Iteration 25: log likelihood = .14750265
Iteration 26: log likelihood = .14752537
Iteration 27: log likelihood = .14752873
Iteration 28: log likelihood = .14752901
Iteration 29: log likelihood = .14752911

```

ARIMA regression

```

Sample: 2012w19 - 2013w36      Number of obs   =      70
                               Wald chi2(10)        =     173.44
Log likelihood = .1475291      Prob > chi2     =      0.0000

```

| D.lnHi |           | OPG       |       | z     | P> z      | [95% Conf. Interval] |  |
|--------|-----------|-----------|-------|-------|-----------|----------------------|--|
|        | Coef.     | Std. Err. |       |       |           |                      |  |
| lnHi   |           |           |       |       |           |                      |  |
| L7DWP  |           |           |       |       |           |                      |  |
| D1.    | .0336097  | .0093779  | 3.58  | 0.000 | .0152292  | .0519901             |  |
| L7LST  |           |           |       |       |           |                      |  |
| D1.    | .0893415  | .0240812  | 3.71  | 0.000 | .0421431  | .1365398             |  |
| L5NDVI |           |           |       |       |           |                      |  |
| D1.    | .8242303  | .579412   | 1.42  | 0.155 | -.3113964 | 1.959857             |  |
| L7NDVI |           |           |       |       |           |                      |  |
| D1.    | 1.312499  | .5783868  | 2.27  | 0.023 | .1788816  | 2.446116             |  |
| _cons  | -.0090038 | .0058818  | -1.53 | 0.126 | -.020532  | .0025244             |  |
| -----  |           |           |       |       |           |                      |  |
| ARMA   |           |           |       |       |           |                      |  |
| ar     |           |           |       |       |           |                      |  |
| L1.    | -.2352599 | .2322101  | -1.01 | 0.311 | -.6903833 | .2198635             |  |
| L2.    | .1668797  | .2260443  | 0.74  | 0.460 | -.2761591 | .6099184             |  |
| L3.    | -.1087537 | .1741796  | -0.62 | 0.532 | -.4501394 | .232632              |  |
| L4.    | .3735496  | .2093134  | 1.78  | 0.074 | -.0366972 | .7837964             |  |
| ma     |           |           |       |       |           |                      |  |
| L1.    | -.2762705 | .4355393  | -0.63 | 0.526 | -1.129912 | .5773709             |  |
| L2.    | -.0267155 | .         | .     | .     | .         | .                    |  |
| L3.    | .3235882  | .4529449  | 0.71  | 0.475 | -.5641675 | 1.211344             |  |
| L4.    | -1.020602 | .         | .     | .     | .         | .                    |  |
| /sigma | .2237878  | .0300965  | 7.44  | 0.000 | .1647998  | .2827758             |  |

Note: The test of the variance against zero is one sided, and the two-sided confidence interval is truncated at zero.

```

.
. estat ic

```

| Model | Obs | ll(null) | ll(model) | df | AIC      | BIC      |
|-------|-----|----------|-----------|----|----------|----------|
| .     | 70  | .        | .1475291  | 12 | 23.70494 | 50.68688 |

Note: N=Obs used in calculating BIC; see [R] BIC note

```

.
. estimates store M40

```

```

.
.
. estimates stats M1 M101 M102 M103 M2 M3 M4 M5 M6 M7 M8 M9 M10 M11 M12 M13 M14 M15 M16 M17 M18
M19 M20 M21 M22 M23 M24 M25 M26 M27 M28 M29 M30 M31 M32 M33 M34 M35 M36 M201 M202 M37 M38 M39
> M40

```

| Model | Obs | ll(null) | ll(model) | df | AIC      | BIC      |
|-------|-----|----------|-----------|----|----------|----------|
| M1    | 70  | .        | -7.168514 | 10 | 34.33703 | 56.82198 |
| M101  | 70  | .        | -13.42246 | 6  | 38.84492 | 52.33589 |
| M102  | 70  | .        | -16.42423 | 5  | 42.84847 | 54.09095 |
| M103  | 70  | .        | -11.47655 | 6  | 34.95309 | 48.44406 |
| M2    | 70  | .        | -7.355228 | 9  | 32.71046 | 52.94691 |
| M3    | 70  | .        | -7.716914 | 8  | 31.43383 | 49.42179 |
| M4    | 70  | .        | -8.655586 | 7  | 31.31117 | 47.05064 |
| M5    | 70  | .        | -10.88849 | 6  | 33.77699 | 47.26796 |
| M6    | 70  | .        | -13.99401 | 5  | 37.98802 | 49.2305  |
| M7    | 70  | .        | -21.10717 | 4  | 50.21433 | 59.20831 |
| M8    | 70  | .        | -8.655586 | 7  | 31.31117 | 47.05064 |
| M9    | 70  | .        | -7.94795  | 8  | 31.8959  | 49.88386 |
| M10   | 70  | .        | -7.203828 | 8  | 30.40766 | 48.39562 |
| M11   | 70  | .        | -7.725932 | 9  | 33.45186 | 53.68832 |
| M12   | 70  | .        | -6.32069  | 8  | 28.64138 | 46.62934 |
| M13   | 70  | .        | -2.767082 | 9  | 23.53416 | 43.77062 |
| M14   | 70  | .        | -2.792328 | 10 | 25.58466 | 48.06961 |
| M15   | 70  | .        | -2.670309 | 10 | 25.34062 | 47.82557 |
| M16   | 70  | .        | -2.309591 | 11 | 26.61918 | 51.35263 |
| M17   | 70  | .        | .468079   | 11 | 21.06384 | 45.79729 |
| M18   | 70  | .        | -.8144143 | 12 | 25.62883 | 52.61077 |
| M19   | 70  | .        | -1.186507 | 12 | 26.37301 | 53.35496 |
| M20   | 70  | .        | 1.781855  | 12 | 20.43629 | 47.41823 |
| M21   | 70  | .        | -10.88849 | 6  | 33.77699 | 47.26796 |
| M22   | 70  | .        | -9.779038 | 7  | 33.55808 | 49.29754 |
| M23   | 70  | .        | -8.664278 | 7  | 31.32856 | 47.06802 |
| M24   | 70  | .        | -9.331308 | 8  | 34.66262 | 52.65058 |
| M25   | 70  | .        | -7.24422  | 8  | 30.48844 | 48.4764  |
| M26   | 70  | .        | -3.587484 | 8  | 23.17497 | 41.16293 |
| M27   | 70  | .        | -3.596666 | 8  | 23.19333 | 41.18129 |
| M28   | 70  | .        | -3.135647 | 8  | 22.27129 | 40.25926 |
| M29   | 70  | .        | -2.878773 | 10 | 25.75755 | 48.2425  |
| M30   | 70  | .        | -2.954057 | 10 | 25.90811 | 48.39307 |
| M31   | 70  | .        | -1.674761 | 10 | 23.34952 | 45.83448 |
| M32   | 70  | .        | -.9054903 | 11 | 23.81098 | 48.54443 |
| M33   | 70  | .        | -.3243799 | 11 | 22.64876 | 47.38221 |
| M34   | 70  | .        | .1368329  | 11 | 21.72633 | 46.45978 |
| M35   | 70  | .        | -.0956328 | 12 | 24.19127 | 51.17321 |
| M36   | 70  | .        | 2.144636  | 13 | 21.71073 | 50.94117 |
| M201  | 70  | .        | 2.74636   | 14 | 22.50728 | 53.98621 |
| M202  | 70  | .        | 6.712289  | 14 | 14.57542 | 46.05436 |
| M37   | 70  | .        | 7.329185  | 14 | 13.34163 | 44.82056 |
| M38   | 70  | .        | 2.366169  | 13 | 21.26766 | 50.4981  |
| M39   | 70  | .        | .1817421  | 13 | 25.63652 | 54.86695 |
| M40   | 70  | .        | .1475291  | 12 | 23.70494 | 50.68688 |

Note: N=Obs used in calculating BIC; see [R] BIC note

```
.
.
.
. ** We see here that M37 and M202 are the best models in terms of AIC. Therefore we use these
two to create
```

```
.
. ** predictions for the study period, now involving the fitting period -(2012w19 - 2013w36) as
well as the
```

```
.
. ** evaluation period (2011w19-2012w18). Then we recalculate the logtransformation, creating
numbers in actual predicted incidence.
```

```
.
.
.
. arima lnHi L7DWP L7LST L5NDVI L7NDVI, arima(6,1,5)
```

```
(setting optimization to BHHH)
```

```

Iteration 0: log likelihood = -22.298679
Iteration 1: log likelihood = -18.887532
Iteration 2: log likelihood = -18.691433
Iteration 3: log likelihood = -18.284163
Iteration 4: log likelihood = -18.270472 (backed up)
(switching optimization to BFGS)
Iteration 5: log likelihood = -18.255182 (backed up)
Iteration 6: log likelihood = -15.923284
Iteration 7: log likelihood = -15.853381
Iteration 8: log likelihood = -15.460629
Iteration 9: log likelihood = -14.689023
Iteration 10: log likelihood = -14.587843
Iteration 11: log likelihood = -13.90904
Iteration 12: log likelihood = -13.417209
Iteration 13: log likelihood = -13.048731
Iteration 14: log likelihood = -12.862278
(switching optimization to BHHH)
Iteration 15: log likelihood = -12.562738
Iteration 16: log likelihood = -12.540436
Iteration 17: log likelihood = -12.534138 (backed up)
Iteration 18: log likelihood = -12.512145
Iteration 19: log likelihood = -12.505572 (backed up)
(switching optimization to BFGS)
Iteration 20: log likelihood = -12.505435 (backed up)
Iteration 21: log likelihood = -12.468327
Iteration 22: log likelihood = -12.071319
Iteration 23: log likelihood = -11.569511
Iteration 24: log likelihood = -11.433567
Iteration 25: log likelihood = -11.239107
Iteration 26: log likelihood = -11.190798
Iteration 27: log likelihood = -10.799541
Iteration 28: log likelihood = -10.645571
Iteration 29: log likelihood = -10.527881
(switching optimization to BHHH)
Iteration 30: log likelihood = -10.475649
Iteration 31: log likelihood = -10.467962 (backed up)
Iteration 32: log likelihood = -10.467136 (backed up)
Iteration 33: log likelihood = -10.46706 (backed up)
Iteration 34: log likelihood = -10.466921 (backed up)
(switching optimization to BFGS)
Iteration 35: log likelihood = -10.46692 (backed up)
Iteration 36: log likelihood = -10.46648 (backed up)
Iteration 37: log likelihood = -10.463073
Iteration 38: log likelihood = -10.449686
Iteration 39: log likelihood = -10.442555
Iteration 40: log likelihood = -10.440498
Iteration 41: log likelihood = -10.439305
Iteration 42: log likelihood = -10.439111
Iteration 43: log likelihood = -10.439062
Iteration 44: log likelihood = -10.439049
(switching optimization to BHHH)
Iteration 45: log likelihood = -10.439045 (not concave)
Iteration 46: log likelihood = -10.439045 (not concave)
Iteration 47: log likelihood = -10.439045 (not concave)
Iteration 48: log likelihood = -10.439045 (not concave)
Iteration 49: log likelihood = -10.439045 (not concave)
(switching optimization to BFGS)
Iteration 50: log likelihood = -10.439045

```

ARIMA regression

```

Sample: 2011w27 - 2013w36          Number of obs   =      114
                                   Wald chi2(13)       =      448.71
Log likelihood = -10.43905         Prob > chi2     =      0.0000

```

```

-----+-----
                |                OPG
                |      Coef.   Std. Err.   z   P>|z|   [95% Conf. Interval]
-----+-----
lnHi           |
L7DWP         |

```

|        |           |          |        |       |           |           |
|--------|-----------|----------|--------|-------|-----------|-----------|
| D1.    | .0257025  | .0111891 | 2.30   | 0.022 | .0037722  | .0476329  |
| L7LST  |           |          |        |       |           |           |
| D1.    | .1152267  | .0146107 | 7.89   | 0.000 | .0865903  | .1438632  |
| L5NDVI |           |          |        |       |           |           |
| D1.    | .6947368  | .5566177 | 1.25   | 0.212 | -.3962139 | 1.785688  |
| L7NDVI |           |          |        |       |           |           |
| D1.    | 1.537456  | .4923495 | 3.12   | 0.002 | .5724683  | 2.502443  |
| _cons  | -.0083395 | .0006945 | -12.01 | 0.000 | -.0097008 | -.0069783 |
| -----  |           |          |        |       |           |           |
| ARMA   |           |          |        |       |           |           |
| ar     |           |          |        |       |           |           |
| L1.    | .2909708  | .1402287 | 2.07   | 0.038 | .0161276  | .565814   |
| L2.    | .2988342  | .1578226 | 1.89   | 0.058 | -.0104925 | .6081609  |
| L3.    | .298608   | .1275222 | 2.34   | 0.019 | .0486692  | .5485469  |
| L4.    | .561064   | .1195376 | 4.69   | 0.000 | .3267745  | .7953534  |
| L5.    | -.5501359 | .1226556 | -4.49  | 0.000 | -.7905364 | -.3097354 |
| L6.    | -.2597369 | .1335631 | -1.94  | 0.052 | -.5215157 | .0020419  |
| ma     |           |          |        |       |           |           |
| L1.    | -.8485374 | .        | .      | .     | .         | .         |
| L2.    | -.1277489 | .0961706 | -1.33  | 0.184 | -.3162398 | .060742   |
| L3.    | -.2187091 | .        | .      | .     | .         | .         |
| L4.    | -.7745337 | .2491407 | -3.11  | 0.002 | -1.26284  | -.2862268 |
| L5.    | .9737784  | .2796871 | 3.48   | 0.000 | .4256018  | 1.521955  |
| -----  |           |          |        |       |           |           |
| /sigma | .2489817  | .0307607 | 8.09   | 0.000 | .1886919  | .3092716  |
| -----  |           |          |        |       |           |           |

Note: The test of the variance against zero is one sided, and the two-sided confidence interval is truncated at zero.

```

.
. predict M37, y
(14 missing values generated)

.
. gen ARIMAHIGHM37=exp(M37)
(14 missing values generated)

.
.
. arima lnHi L7DWP L7LST L7NDVI, arima(6,1,5)

(setting optimization to BHHH)
Iteration 0: log likelihood = -23.607841
Iteration 1: log likelihood = -20.761276
Iteration 2: log likelihood = -18.646794
Iteration 3: log likelihood = -18.339528
Iteration 4: log likelihood = -17.842438
(swimming optimization to BFGS)
Iteration 5: log likelihood = -17.818927 (backed up)
Iteration 6: log likelihood = -16.086962
Iteration 7: log likelihood = -15.512626
Iteration 8: log likelihood = -15.262353
Iteration 9: log likelihood = -14.712251
Iteration 10: log likelihood = -14.628691
Iteration 11: log likelihood = -14.507857
Iteration 12: log likelihood = -14.440531
Iteration 13: log likelihood = -14.438149
Iteration 14: log likelihood = -14.408116
(swimming optimization to BHHH)
Iteration 15: log likelihood = -14.233257
Iteration 16: log likelihood = -14.218202 (backed up)
Iteration 17: log likelihood = -14.210509 (backed up)
Iteration 18: log likelihood = -14.210361 (backed up)
Iteration 19: log likelihood = -14.21034 (backed up)
(swimming optimization to BFGS)

```

```

Iteration 20: log likelihood = -14.210334 (backed up)
Iteration 21: log likelihood = -14.155911
Iteration 22: log likelihood = -14.04352
Iteration 23: log likelihood = -13.88572
Iteration 24: log likelihood = -13.39612
Iteration 25: log likelihood = -12.963994
Iteration 26: log likelihood = -12.616855
Iteration 27: log likelihood = -12.118749
Iteration 28: log likelihood = -11.80311
Iteration 29: log likelihood = -11.64575
(swimming optimization to BHHH)
Iteration 30: log likelihood = -11.538191
Iteration 31: log likelihood = -11.537383 (backed up)
Iteration 32: log likelihood = -11.537136 (backed up)
Iteration 33: log likelihood = -11.53707 (backed up)
Iteration 34: log likelihood = -11.53707 (backed up)
(swimming optimization to BFGS)
Iteration 35: log likelihood = -11.53707 (backed up)
Iteration 36: log likelihood = -11.534729
Iteration 37: log likelihood = -11.526747
Iteration 38: log likelihood = -11.523731
Iteration 39: log likelihood = -11.515017
Iteration 40: log likelihood = -11.511784
Iteration 41: log likelihood = -11.51116
Iteration 42: log likelihood = -11.511021
Iteration 43: log likelihood = -11.510877
Iteration 44: log likelihood = -11.51086
(swimming optimization to BHHH)
Iteration 45: log likelihood = -11.510857 (not concave)
Iteration 46: log likelihood = -11.510857 (not concave)
Iteration 47: log likelihood = -11.510857 (not concave)
Iteration 48: log likelihood = -11.510857 (not concave)
Iteration 49: log likelihood = -11.510857 (not concave)
(swimming optimization to BFGS)
Iteration 50: log likelihood = -11.510857
Iteration 51: log likelihood = -11.510857 (backed up)
Iteration 52: log likelihood = -11.510857 (backed up)
Iteration 53: log likelihood = -11.510857 (backed up)
Iteration 54: log likelihood = -11.510857 (backed up)
Iteration 55: log likelihood = -11.510857 (backed up)
Iteration 56: log likelihood = -11.510857 (backed up)
Iteration 57: log likelihood = -11.510857 (backed up)
Iteration 58: log likelihood = -11.510857 (backed up)
Iteration 59: log likelihood = -11.510857 (backed up)
(swimming optimization to BHHH)
Iteration 60: log likelihood = -11.510857 (not concave)
Iteration 61: log likelihood = -11.510857 (not concave)
Iteration 62: log likelihood = -11.510857 (not concave)
Iteration 63: log likelihood = -11.510857 (not concave)
Iteration 64: log likelihood = -11.510857 (not concave)
(swimming optimization to BFGS)
Iteration 65: log likelihood = -11.510857

```

ARIMA regression

```

Sample: 2011w27 - 2013w36
Log likelihood = -11.51086
Number of obs = 114
Wald chi2(12) = 7745.02
Prob > chi2 = 0.0000

```

|        |        | OPG      |           |      |       |                      |          |
|--------|--------|----------|-----------|------|-------|----------------------|----------|
| D.lnHi |        | Coef.    | Std. Err. | z    | P> z  | [95% Conf. Interval] |          |
| lnHi   | L7DWP  |          |           |      |       |                      |          |
|        | D1.    | .0298873 | .0096808  | 3.09 | 0.002 | .0109132             | .0488614 |
|        | L7LST  |          |           |      |       |                      |          |
|        | D1.    | .1175246 | .0145969  | 8.05 | 0.000 | .0889152             | .146134  |
|        | L7NDVI |          |           |      |       |                      |          |

|       |        |  |           |          |        |       |           |           |
|-------|--------|--|-----------|----------|--------|-------|-----------|-----------|
|       | D1.    |  | 1.928777  | .392817  | 4.91   | 0.000 | 1.15887   | 2.698684  |
|       | _cons  |  | -.0084066 | .0006988 | -12.03 | 0.000 | -.0097763 | -.007037  |
| ----- |        |  |           |          |        |       |           |           |
| ARMA  |        |  |           |          |        |       |           |           |
|       | ar     |  |           |          |        |       |           |           |
|       | L1.    |  | .3213923  | .1426251 | 2.25   | 0.024 | .0418522  | .6009324  |
|       | L2.    |  | .3060204  | .159101  | 1.92   | 0.054 | -.0058117 | .6178526  |
|       | L3.    |  | .2884556  | .1298891 | 2.22   | 0.026 | .0338777  | .5430336  |
|       | L4.    |  | .5146181  | .1334147 | 3.86   | 0.000 | .2531301  | .7761061  |
|       | L5.    |  | -.553195  | .1309212 | -4.23  | 0.000 | -.8097958 | -.2965942 |
|       | L6.    |  | -.2160199 | .1352549 | -1.60  | 0.110 | -.4811146 | .0490747  |
|       |        |  |           |          |        |       |           |           |
|       | ma     |  |           |          |        |       |           |           |
|       | L1.    |  | -.8612027 | .3005348 | -2.87  | 0.004 | -1.45024  | -.2721653 |
|       | L2.    |  | -.1114014 | .0766365 | -1.45  | 0.146 | -.2616063 | .0388034  |
|       | L3.    |  | -.2169854 | .        | .      | .     | .         | .         |
|       | L4.    |  | -.7756819 | .3081842 | -2.52  | 0.012 | -1.379712 | -.1716519 |
|       | L5.    |  | .9697876  | .        | .      | .     | .         | .         |
| ----- |        |  |           |          |        |       |           |           |
|       | /sigma |  | .2513475  | .0204828 | 12.27  | 0.000 | .2112018  | .2914931  |
| ----- |        |  |           |          |        |       |           |           |

Note: The test of the variance against zero is one sided, and the two-sided confidence interval is truncated at zero.

```

.
. predict M202, y
(14 missing values generated)

.
. gen ARIMAHIGHM202=exp(M202)
(14 missing values generated)

.
.
. ** To graph these two with the actual incidence we write:

.
.
. tsline Hi ARIMAHIGHM202 ARIMAHIGHM37

.
.
. ** To analyze the residuals of the model, we use Ljung Box Q-test to see whether there is
autocorrelation in the residuals, then indicating missing

.
. *variables/missing model fit, or if these are represented by random white noise.

.
.
. arima lnHi L7DWP L7LST L5NDVI L7NDVI, arima(6,1,5)

(setting optimization to BHHH)
Iteration 0: log likelihood = -22.298679
Iteration 1: log likelihood = -18.887532
Iteration 2: log likelihood = -18.691433
Iteration 3: log likelihood = -18.284163
Iteration 4: log likelihood = -18.270472 (backed up)
(swimming optimization to BFGS)
Iteration 5: log likelihood = -18.255182 (backed up)
Iteration 6: log likelihood = -15.923284
Iteration 7: log likelihood = -15.853381
Iteration 8: log likelihood = -15.460629
Iteration 9: log likelihood = -14.689023
Iteration 10: log likelihood = -14.587843
Iteration 11: log likelihood = -13.90904

```

```

Iteration 12: log likelihood = -13.417209
Iteration 13: log likelihood = -13.048731
Iteration 14: log likelihood = -12.862278
(switching optimization to BHHH)
Iteration 15: log likelihood = -12.562738
Iteration 16: log likelihood = -12.540436
Iteration 17: log likelihood = -12.534138 (backed up)
Iteration 18: log likelihood = -12.512145
Iteration 19: log likelihood = -12.505572 (backed up)
(switching optimization to BFGS)
Iteration 20: log likelihood = -12.505435 (backed up)
Iteration 21: log likelihood = -12.468327
Iteration 22: log likelihood = -12.071319
Iteration 23: log likelihood = -11.569511
Iteration 24: log likelihood = -11.433567
Iteration 25: log likelihood = -11.239107
Iteration 26: log likelihood = -11.190798
Iteration 27: log likelihood = -10.799541
Iteration 28: log likelihood = -10.645571
Iteration 29: log likelihood = -10.527881
(switching optimization to BHHH)
Iteration 30: log likelihood = -10.475649
Iteration 31: log likelihood = -10.467962 (backed up)
Iteration 32: log likelihood = -10.467136 (backed up)
Iteration 33: log likelihood = -10.46706 (backed up)
Iteration 34: log likelihood = -10.466921 (backed up)
(switching optimization to BFGS)
Iteration 35: log likelihood = -10.46692 (backed up)
Iteration 36: log likelihood = -10.46648 (backed up)
Iteration 37: log likelihood = -10.463073
Iteration 38: log likelihood = -10.449686
Iteration 39: log likelihood = -10.442555
Iteration 40: log likelihood = -10.440498
Iteration 41: log likelihood = -10.439305
Iteration 42: log likelihood = -10.439111
Iteration 43: log likelihood = -10.439062
Iteration 44: log likelihood = -10.439049
(switching optimization to BHHH)
Iteration 45: log likelihood = -10.439045 (not concave)
Iteration 46: log likelihood = -10.439045 (not concave)
Iteration 47: log likelihood = -10.439045 (not concave)
Iteration 48: log likelihood = -10.439045 (not concave)
Iteration 49: log likelihood = -10.439045 (not concave)
(switching optimization to BFGS)
Iteration 50: log likelihood = -10.439045

```

ARIMA regression

```

Sample: 2011w27 - 2013w36          Number of obs   =      114
                                   Wald chi2(13)       =      448.71
Log likelihood = -10.43905         Prob > chi2     =      0.0000

```

|        |        | OPG       |           |        |       |                      |           |
|--------|--------|-----------|-----------|--------|-------|----------------------|-----------|
| D.lnHi |        | Coef.     | Std. Err. | z      | P> z  | [95% Conf. Interval] |           |
| lnHi   | L7DWP  |           |           |        |       |                      |           |
|        | D1.    | .0257025  | .0111891  | 2.30   | 0.022 | .0037722             | .0476329  |
|        | L7LST  |           |           |        |       |                      |           |
|        | D1.    | .1152267  | .0146107  | 7.89   | 0.000 | .0865903             | .1438632  |
|        | L5NDVI |           |           |        |       |                      |           |
|        | D1.    | .6947368  | .5566177  | 1.25   | 0.212 | -.3962139            | 1.785688  |
|        | L7NDVI |           |           |        |       |                      |           |
|        | D1.    | 1.537456  | .4923495  | 3.12   | 0.002 | .5724683             | 2.502443  |
|        | _cons  | -.0083395 | .0006945  | -12.01 | 0.000 | -.0097008            | -.0069783 |

| ARMA   |           |          |       |       |           |           |
|--------|-----------|----------|-------|-------|-----------|-----------|
| ar     |           |          |       |       |           |           |
| L1.    | .2909708  | .1402287 | 2.07  | 0.038 | .0161276  | .565814   |
| L2.    | .2988342  | .1578226 | 1.89  | 0.058 | -.0104925 | .6081609  |
| L3.    | .298608   | .1275222 | 2.34  | 0.019 | .0486692  | .5485469  |
| L4.    | .561064   | .1195376 | 4.69  | 0.000 | .3267745  | .7953534  |
| L5.    | -.5501359 | .1226556 | -4.49 | 0.000 | -.7905364 | -.3097354 |
| L6.    | -.2597369 | .1335631 | -1.94 | 0.052 | -.5215157 | .0020419  |
| ma     |           |          |       |       |           |           |
| L1.    | -.8485374 | .        | .     | .     | .         | .         |
| L2.    | -.1277489 | .0961706 | -1.33 | 0.184 | -.3162398 | .060742   |
| L3.    | -.2187091 | .        | .     | .     | .         | .         |
| L4.    | -.7745337 | .2491407 | -3.11 | 0.002 | -1.26284  | -.2862268 |
| L5.    | .9737784  | .2796871 | 3.48  | 0.000 | .4256018  | 1.521955  |
| -----  |           |          |       |       |           |           |
| /sigma | .2489817  | .0307607 | 8.09  | 0.000 | .1886919  | .3092716  |
| -----  |           |          |       |       |           |           |

Note: The test of the variance against zero is one sided, and the two-sided confidence interval is truncated at zero.

```
.
. predict res, r
(15 missing values generated)
```

```
.
. wntestq res
```

Portmanteau test for white noise

```
-----
Portmanteau (Q) statistic = 23.9975
Prob > chi2(40) = 0.9787
```

```
.
.
. ** No autocorrelation is seen in the residuals of the models.
```

```
.
. ** Now, we also want to see what the mean average prediction error is for the evaluation
period of the best fit model.
```

```
.
. ** This is done by taking ARIMAHIGHM37 minus actual cases, then dividing this with the actual
cases. All is done as time series,
```

```
.
. ** then we divide this by (100/no of observations in the evaluation period) and multiply
with the sum of the residuals.
```

```
.
. gen MPEhi=(ARIMAHIGHM37-Hi)/ Hi if tin(2011w19, 2012w18)
(85 missing values generated)
```

```
.
. sum MPEhi
```

| Variable | Obs | Mean   | Std. Dev. | Min       | Max      |
|----------|-----|--------|-----------|-----------|----------|
| MPEhi    | 44  | .06368 | .3500036  | -.6812162 | 1.390622 |

```
.
. display r(sum)
2.8019194
```



```

.
. display = (100/(44))* 2.8019194
6.3679986
.
.
.
.
.
. ** Now, we see that the ARIMAHIGHM37 is the best model regarding AIC and has a good MAE for
the evaluation period as well as looks good visually.
.
. ** We use this model to create a forecast, this is done by:
.
.
.
. arima lnHi L7DWP L7LST L5NDVI L7NDVI, arima(6,1,5)

(setting optimization to BHHH)
Iteration 0: log likelihood = -22.298679
Iteration 1: log likelihood = -18.887532
Iteration 2: log likelihood = -18.691433
Iteration 3: log likelihood = -18.284163
Iteration 4: log likelihood = -18.270472 (backed up)
(swimming optimization to BFGS)
Iteration 5: log likelihood = -18.255182 (backed up)
Iteration 6: log likelihood = -15.923284
Iteration 7: log likelihood = -15.853381
Iteration 8: log likelihood = -15.460629
Iteration 9: log likelihood = -14.689023
Iteration 10: log likelihood = -14.587843
Iteration 11: log likelihood = -13.90904
Iteration 12: log likelihood = -13.417209
Iteration 13: log likelihood = -13.048731
Iteration 14: log likelihood = -12.862278
(swimming optimization to BHHH)
Iteration 15: log likelihood = -12.562738
Iteration 16: log likelihood = -12.540436
Iteration 17: log likelihood = -12.534138 (backed up)
Iteration 18: log likelihood = -12.512145
Iteration 19: log likelihood = -12.505572 (backed up)
(swimming optimization to BFGS)
Iteration 20: log likelihood = -12.505435 (backed up)
Iteration 21: log likelihood = -12.468327
Iteration 22: log likelihood = -12.071319
Iteration 23: log likelihood = -11.569511
Iteration 24: log likelihood = -11.433567
Iteration 25: log likelihood = -11.239107
Iteration 26: log likelihood = -11.190798
Iteration 27: log likelihood = -10.799541
Iteration 28: log likelihood = -10.645571
Iteration 29: log likelihood = -10.527881
(swimming optimization to BHHH)
Iteration 30: log likelihood = -10.475649
Iteration 31: log likelihood = -10.467962 (backed up)
Iteration 32: log likelihood = -10.467136 (backed up)
Iteration 33: log likelihood = -10.46706 (backed up)
Iteration 34: log likelihood = -10.466921 (backed up)
(swimming optimization to BFGS)
Iteration 35: log likelihood = -10.46692 (backed up)
Iteration 36: log likelihood = -10.46648 (backed up)
Iteration 37: log likelihood = -10.463073
Iteration 38: log likelihood = -10.449686
Iteration 39: log likelihood = -10.442555
Iteration 40: log likelihood = -10.440498
Iteration 41: log likelihood = -10.439305
Iteration 42: log likelihood = -10.439111
Iteration 43: log likelihood = -10.439062
Iteration 44: log likelihood = -10.439049

```

```
(switching optimization to BHHH)
Iteration 45: log likelihood = -10.439045 (not concave)
Iteration 46: log likelihood = -10.439045 (not concave)
Iteration 47: log likelihood = -10.439045 (not concave)
Iteration 48: log likelihood = -10.439045 (not concave)
Iteration 49: log likelihood = -10.439045 (not concave)
(switching optimization to BFGS)
Iteration 50: log likelihood = -10.439045
```

ARIMA regression

```
Sample: 2011w27 - 2013w36          Number of obs   =      114
                                   Wald chi2(13)       =      448.71
Log likelihood = -10.43905         Prob > chi2      =      0.0000
```

|        |        | OPG       |          | z      | P> z  | [95% Conf. Interval] |           |
|--------|--------|-----------|----------|--------|-------|----------------------|-----------|
| D.lnHi | Coef.  | Std. Err. |          |        |       |                      |           |
| -----  |        |           |          |        |       |                      |           |
| lnHi   |        |           |          |        |       |                      |           |
|        | L7DWP  |           |          |        |       |                      |           |
|        | D1.    | .0257025  | .0111891 | 2.30   | 0.022 | .0037722             | .0476329  |
|        | L7LST  |           |          |        |       |                      |           |
|        | D1.    | .1152267  | .0146107 | 7.89   | 0.000 | .0865903             | .1438632  |
|        | L5NDVI |           |          |        |       |                      |           |
|        | D1.    | .6947368  | .5566177 | 1.25   | 0.212 | -.3962139            | 1.785688  |
|        | L7NDVI |           |          |        |       |                      |           |
|        | D1.    | 1.537456  | .4923495 | 3.12   | 0.002 | .5724683             | 2.502443  |
|        | _cons  | -.0083395 | .0006945 | -12.01 | 0.000 | -.0097008            | -.0069783 |
| -----  |        |           |          |        |       |                      |           |
| ARMA   |        |           |          |        |       |                      |           |
|        | ar     |           |          |        |       |                      |           |
|        | L1.    | .2909708  | .1402287 | 2.07   | 0.038 | .0161276             | .565814   |
|        | L2.    | .2988342  | .1578226 | 1.89   | 0.058 | -.0104925            | .6081609  |
|        | L3.    | .298608   | .1275222 | 2.34   | 0.019 | .0486692             | .5485469  |
|        | L4.    | .561064   | .1195376 | 4.69   | 0.000 | .3267745             | .7953534  |
|        | L5.    | -.5501359 | .1226556 | -4.49  | 0.000 | -.7905364            | -.3097354 |
|        | L6.    | -.2597369 | .1335631 | -1.94  | 0.052 | -.5215157            | .0020419  |
|        | ma     |           |          |        |       |                      |           |
|        | L1.    | -.8485374 | .        | .      | .     | .                    | .         |
|        | L2.    | -.1277489 | .0961706 | -1.33  | 0.184 | -.3162398            | .060742   |
|        | L3.    | -.2187091 | .        | .      | .     | .                    | .         |
|        | L4.    | -.7745337 | .2491407 | -3.11  | 0.002 | -1.26284             | -.2862268 |
|        | L5.    | .9737784  | .2796871 | 3.48   | 0.000 | .4256018             | 1.521955  |
|        | /sigma | .2489817  | .0307607 | 8.09   | 0.000 | .1886919             | .3092716  |
| -----  |        |           |          |        |       |                      |           |

Note: The test of the variance against zero is one sided, and the two-sided confidence interval is truncated at zero.

```
. predict M37fcast, dynamic(tw(2013w37)) y
(8 missing values generated)
```

```
.
.
.
. gen Forecast=exp(M37fcast)
(8 missing values generated)
```

```
.
.
.
. * In our study, we choose to use 4weekly forecasts. Therefore we first calculate the residuals
for each week comparing forecast with the actual incidence just
```

. \* as the MAE was calculated for the evaluation period. See example below. However, this was done in Excel and is not included here more than by example.

.

.

. \* gen MPEForecast=(ARIMAHIGHM37-Hi)/ Hi if tin(2013w37, 2013w41)

.

. \* sum MPEhi

.

. \* display r(sum)

.

. \* display = (100/(4))\* r(sum)

. log close

name: <unnamed>

log: C:\Users\David\Google Drive\Zambia - ISEX T10\Data Monze + Choma\FINAL MODELS -  
GRAPHS AND DOFILES\Log-file - exemplifying the process using High Zone.smcl

log type: smcl

closed on: 27 Dec 2013, 12:42:18

-----
